# Supplementary material for: Tissue Culture in Ornamentals: Cultivation Factors, Propagation Techniques, and Its Application
Source: MDPI journal article supplement (doi:10.3390/plants11233208), 2022-11-23
Supplement: s1 [file s1]

# Tissue culture in ornamentals: Factors and techniques in propagation, and its application

Hasan Mehbub <sup>1</sup>, Ayasha Akter <sup>2</sup>, Mst. Arjina Akter <sup>3,4</sup>, Md Shamim Hasan Mandal <sup>5</sup>, Md. Ashraful Hoque <sup>3</sup>, Monika Teluja <sup>6</sup>, Hasan Mehraj <sup>4,\*</sup>

<sup>1</sup> The United Graduate School of Agricultural Science, Ehime University, Matsuyama 790-8556, Japan

<sup>2</sup> Department of Horticulture, Bangladesh Agricultural University, Mymensingh, Bangladesh

<sup>3</sup> Department of Plant Pathology, Bangladesh Agricultural University, Mymensingh, Bangladesh

<sup>4</sup> Graduate School of Agricultural Science, Kobe University, Japan

<sup>5</sup> Graduate School of Advanced Science and Engineering, Hiroshima University, Japan

<sup>6</sup> Department of Plant Cytology and Embryology, Institute of Botany, Faculty of Biology, Jagiellonian University, Gronostajowa 9, 30-387 Krakow, Poland

\* Correspondence: hmehraj02@yahoo.com or hmehraj02@port.kobe-u.ac.jp

| Abbreviations      |                  |                                                                                                                                                                                                                   |
|--------------------|------------------|-------------------------------------------------------------------------------------------------------------------------------------------------------------------------------------------------------------------|
| Medium             |                  |                                                                                                                                                                                                                   |
|                    | MS               | Murashige and Skoog                                                                                                                                                                                               |
|                    | 1/2 MS           | Half strength MS medium                                                                                                                                                                                           |
|                    | LM               | Liquid media                                                                                                                                                                                                      |
|                    | MS-LM            | MS liquid medium                                                                                                                                                                                                  |
|                    | mMS <sup>1</sup> | MS medium supplemented with 412.5 mg/L NH <sub>4</sub> NO <sub>3</sub> and 950 mg/L KNO <sub>3</sub>                                                                                                              |
|                    | mMS <sup>2</sup> | MS medium supplemented with 100 mg/L MgSO <sub>4</sub> ·7H <sub>2</sub> O, 100 mg/L NH <sub>4</sub> NO <sub>3</sub> , 30 mg/L Fe-EDTA, 1 mg/L thiamine                                                            |
|                    | mMS <sup>3</sup> | MS medium with the elimination of Cl <sup>-</sup> and reduced NH <sub>4</sub> <sup>+</sup> ions                                                                                                                   |
|                    | mMS <sup>4</sup> | MS medium with extra addition of 330 mg/L CaCl <sub>2</sub> ·6H <sub>2</sub> O, 13.9 mg/L FeSO <sub>4</sub> , 20.65 mg/L Na <sub>2</sub> EDTA·2H <sub>2</sub> O                                                   |
|                    | NN               | Nitsch and Nitsch                                                                                                                                                                                                 |
|                    | NDM              | New Dogashima medium                                                                                                                                                                                              |
|                    | VW               | Vacin and Went                                                                                                                                                                                                    |
|                    | mVW              | Ferric tartrate replaced by Na <sub>2</sub> EDTA 37.3 mg/L and FeSO <sub>4</sub> ·7H <sub>2</sub> O 27.8 mg/L                                                                                                     |
|                    | uVW              | Modified VW medium, modification is not specified                                                                                                                                                                 |
|                    | B5               | Gamborg medium                                                                                                                                                                                                    |
|                    | WH               | White medium                                                                                                                                                                                                      |
|                    | WPM              | Woody Plant Medium                                                                                                                                                                                                |
|                    | SH               | Schenk & Hildebrandt medium                                                                                                                                                                                       |
|                    | TC               | Teixeira Cymbidium medium                                                                                                                                                                                         |
|                    | TC1              | Teixeira Cymbidium medium 1                                                                                                                                                                                       |
|                    | mHm              | Modified Hyponex medium (6.5 N4.5 P–19K + 20N–20P–20K)                                                                                                                                                            |
|                    | SM               | Simplified medium with 5 mL/L of Biofert Plus® NPK (08-09-09) fertilizer and 60 g/L ‘Nanica’ banana pulp                                                                                                          |
|                    | MM               | Basal medium of Mitra et al. (1976)                                                                                                                                                                               |
|                    | KC               | Knudson’s C media                                                                                                                                                                                                 |
|                    | mKC              | Modified by ZnSO <sub>4</sub> ·7H <sub>2</sub> O (from 0.331 to 6.62 mg/L), H <sub>3</sub> BO <sub>3</sub> (from 0.056 to 1.4 mg/L) and MnSO <sub>4</sub> ·H <sub>2</sub> O (from 7.5 to 15 mg/L)                 |
|                    | mNS              | Modified nutrient solution of KC, replacement of the iron source by iron-EDTA of MS medium                                                                                                                        |
|                    | O753             | Orchid Multiplication Medium, PHYTAMAX™                                                                                                                                                                           |
|                    | P0931            | Phytamax basal medium                                                                                                                                                                                             |
|                    | NP               | Ichihashi New Phalaenopsis Medium                                                                                                                                                                                 |
|                    | CIM              | Callus induction medium [half strength MS macro- and micronutrients, 250 mg/L peptone, 100 mg/L myo-inositol, 2 mg/L glycine, 0.5 mg/L nicotinic acid, 0.1 mg/L thiamine-HCl, 0.5 mg/L pyridoxin-HCl, 1 mg/L MES] |
|                    | CM               | Chen medium                                                                                                                                                                                                       |
|                    | DKW              | Driver and Kuniyuki walnut (Driver and Kuniyuki 1984)                                                                                                                                                             |
| Carbon sources     |                  |                                                                                                                                                                                                                   |
|                    | suc.             | Sucrose                                                                                                                                                                                                           |
|                    | mal.             | Maltose                                                                                                                                                                                                           |
|                    | glu.             | Glucose                                                                                                                                                                                                           |
|                    | tre.             | Trehalose                                                                                                                                                                                                         |
| Solidifying agents |                  |                                                                                                                                                                                                                   |
|                    | ag               | Agar                                                                                                                                                                                                              |
|                    | gg               | Gellan gum                                                                                                                                                                                                        |
|                    | pg               | Phytagel                                                                                                                                                                                                          |
|                    | gr               | Gelrite                                                                                                                                                                                                           |
|                    | bag              | Bacto agar                                                                                                                                                                                                        |
|                    | cg               | Clarigel                                                                                                                                                                                                          |
|                    | cn               | Carrageenan                                                                                                                                                                                                       |
|                    | pa               | Phyto agar                                                                                                                                                                                                        |
| Light              |                  |                                                                                                                                                                                                                   |

|                                |                 |                                                                                                                       |
|--------------------------------|-----------------|-----------------------------------------------------------------------------------------------------------------------|
| Plant growth regulators (PGRs) | WF              | White fluorescent                                                                                                     |
|                                | PAR LED         | Photosynthetically Active Radiation (blue; 430 nm 5%, 460 nm 10%; red, 610 nm 10%, 630 nm 35%, 660 nm 35%, 730 nm 5%) |
| Auxin                          | IAA             | Indole-3-acetic-acid                                                                                                  |
|                                | IBA             | Indole-3-butyric acid                                                                                                 |
|                                | NAA             | 1-Napthaleneacetic acid                                                                                               |
|                                | 2,4-D           | 2, 4-Diclorophenoxiacetic acid                                                                                        |
|                                | Pic             | Picloram (4-amino-3,5,6-trichloropicolinic acid), a synthetic auxin                                                   |
| Cytokinins                     | BAP             | 6-benzylaminopurine                                                                                                   |
|                                | BA              | 6-benzyladenine                                                                                                       |
|                                | KIN             | Kinetin                                                                                                               |
|                                | ZT              | Zeatin                                                                                                                |
|                                | TDZ             | Thidiazuron (N-phenyl-N'-1,2,3-thiadiazol-5-yl urea)                                                                  |
|                                | mT              | meta-Topolin                                                                                                          |
|                                | ZR              | Zeatin riboside                                                                                                       |
| Gibberellins                   | GA <sub>3</sub> | gibberellic acid                                                                                                      |
| Elicitor                       | Ch              | Chitosan                                                                                                              |
|                                | O-Ch            | Oligomeric-Chitosan mixture                                                                                           |
|                                | P-Ch            | Polymeric-Chitosan                                                                                                    |
|                                | 5-ALA           | 5-aminolevulinic acid                                                                                                 |
|                                | NAG             | N-acetylglucosamine                                                                                                   |
|                                | SA              | Salicylic acid                                                                                                        |
|                                | L-phe           | L-Phenylalanine                                                                                                       |
|                                | HA9             | Hyaluronic Acid with molecular weight 1.08x10 <sup>6</sup> Da                                                         |
|                                | HA12            | Hyaluronic Acid with molecular weight 1.2x10 <sup>6</sup> Da                                                          |
|                                | JA              | Jasmonic acid                                                                                                         |
|                                | MeJA            | Methyl jasmonate                                                                                                      |
|                                | PG              | P hloroglucinol                                                                                                       |
| Carbocyclic sugar              |                 |                                                                                                                       |
| Plant hormones                 | MI              | <i>myo</i> -inositol                                                                                                  |
|                                | MeI             | <i>meso</i> -inositol                                                                                                 |
|                                | 24-EpiB         | Epin-Extra® (24-epibrassinolide)                                                                                      |
| Lanthanoids                    | RE              | Ribav-Extra®                                                                                                          |
|                                | TRIA            | Triacantanol                                                                                                          |
|                                | Nd              | Neodymium nitrate                                                                                                     |

|       |               |                                                                           |      |                    |       |                                               |
|-------|---------------|---------------------------------------------------------------------------|------|--------------------|-------|-----------------------------------------------|
| Misc. | CCC           | Chlorocholine chloride (CCC: (2-chloroethyl) trimethyl-ammonium chloride) |      |                    |       |                                               |
|       | MES           | 4-morpholineethanesulfonic acid                                           |      |                    |       |                                               |
|       | NAg           | Nano-silve                                                                |      |                    |       |                                               |
|       | 2iP           | 6-( $\gamma,\gamma$ -dimethylallylamino)purine                            |      |                    |       |                                               |
|       | ac            | Activateddd charcoal                                                      |      |                    |       |                                               |
|       | HYPONeX       | liquid, N:P:K=6:3:3                                                       |      |                    |       |                                               |
|       | Thi           | Thiamine                                                                  | Bio  | Biotin             | AS    | Adenine sulphate                              |
|       | L-gl          | L–glutamine                                                               | Nia  | Niacin             | CA    | Citric acid                                   |
|       | Pt            | Peptone                                                                   | PHCl | Pyridoxine HCl     | L-arg | L-arginine                                    |
|       | <i>p</i> –ABC | <i>p</i> –aminobenzoic acid                                               | gly  | Glycine            | 6P    | 6-(4-hydroxy-3-methylbut-2- enylamino) purine |
|       | T–HCl         | Thiamine HCl                                                              | Chl  | Casein hydrolysate | CPPU  | N-(2-chloro4-pyridl)-N'-phenylurea            |
|       | cw            | Coconut water                                                             | pyr  | Pyridoxine         | Tt    | Tryptone                                      |
|       | BH            | Banana homogenate                                                         | NA   | Nicotinic acid     | Spe   | Spermin, a Polyamines                         |
|       | PH            | Potato homogenate                                                         | pac  | Paclobutrazol      | Orn   | Ornithyne, a Polyamines                       |
|       | TH            | tomato homogenate                                                         | glu  | Glutamine          | wks   | Weeks                                         |
|       | Pu            | Putrescine, a Polyamines                                                  | AA   | Ascorbic acid      |       |                                               |

Table S1. Effective plant growth regulators and other factors for the in vitro culture in ornamentals.

| Plant species                       | Media            | Carbon source | Solidifying agent | Media supplements      | Effective concentration and combinations                             | Temperature | Light / dark cycle | Culture period | Target of regeneration                   | Ref                       |
|-------------------------------------|------------------|---------------|-------------------|------------------------|----------------------------------------------------------------------|-------------|--------------------|----------------|------------------------------------------|---------------------------|
| Cymbidium orchid                    |                  |               |                   |                        |                                                                      |             |                    |                |                                          |                           |
| Cymbidium Twilight Moon "Day Light" | TC               | 2% suc.       | 0.8% bag          | –                      | 1-2 mg/L 2,4-D or 1 mg/L TDZ                                         | 25 °C       | 16 h/ 8 h          | –              | Embryogenic callus                       | da Silva 2014a            |
| Cymbidium aloifolium                | MS               | 3% suc.       | 0.8% ag           | 100 mg/L MI            | 5 mg/L NAA                                                           | 25±1 °C     | –                  | 8 wks          | Rhizomes                                 | Nayak et al. 1998         |
| C. aloifolium                       | MS               | 3% suc.       | 0.8% ag           | 100 mg/L MI            | 1 mg/L BA + 0.1 mg/L NAA                                             | 25±1 °C     | –                  | 8 wks          | Shoot/rhizome                            | Nayak et al. 2002         |
| C. aloifolium Sw.                   | MS               | 3% suc.       | 0.8% ag           | 100 mg/L MI            | 14 µM ZR (PLBs); 9.8 µM IBA (root)                                   | 25±1 °C     | –                  | 10 wks         | PLBs and root induction                  |                           |
| Cymbidium "Memoria Amelia Earhart"  | 1/2 MS           | –             | 0.7% ag           | 0.15% ac               | 10 <sup>6</sup> % 24-EpiB; 11.6 µM KIN + 2.9 µM IAA                  | 22±2 °C     | 16 h/ 8 h          | 6 wks          | PLBs                                     | Lukatkin et al. 2019      |
|                                     | MS               | –             | 0.7% ag           | 0.15% ac               | 10 <sup>4</sup> %-10 <sup>5</sup> % 24-EpiB; 0.5 µM KIN + 2.9 µM IAA | 22±2 °C     | 16 h/ 8 h          | 6 wks          | Shoot organogenesis                      |                           |
|                                     | MS               | –             | 0.7% ag           | 0.15% ac               | 10 <sup>4</sup> % RE; 4.4 µM or 13.3 µM BA; 109 µM TDZ + 2.9 µM IAA  | 22±2 °C     | 16 h/ 8 h          | 6 wks          | Shoot organogenesis                      |                           |
| Cymbidium Waltz "Idol"              | mMS <sup>1</sup> | 2% suc.       | 0.2% pg           | –                      | 0.1 mg/L HA9                                                         | 25±2 °C     | 16 h/ 8 h          | 40 days        | PLBs proliferation                       | Kaewjampa et al. 2012     |
| C. insigne                          | mMS <sup>1</sup> | 2% suc.       | 0.2% pg           | –                      | 0.1 mg/L CS                                                          | –           | 16 h/ 8 h          | 8 wks          | PLBs proliferation                       | Nahar et al. 2013         |
| C. faberi Rolfe                     | 1/2 MS           | 3% suc.       | 0.68% ag          | 2 g/L ac + 0.5 g/L Chl | 0.5, 1, 2 mg/L NAA                                                   | 25±2 °C     | 12 h/ 12 h         | 30 days        | PLB organogenesis and proliferation      | Tao et al. 2011           |
|                                     | 1/2 MS           | 3% suc.       | 0.68% ag          | 3 g/L ac + 0.5 g/L Chl | 1 mg/L TDZ + 0.5 mg/L NAA (shoot); 0.5 mg/L IBA (root)               | 25±2 °C     | 12 h/ 12 h         | 30~60 days     | Shoot and root organogenesis             |                           |
| C. dayanum                          | mMS <sup>1</sup> | 2% suc.       | 0.2% pg           | –                      | 0.1 mg/L Ch; 0.1 mg/L HA9                                            | 25 °C       | 16 h/ 8 h          | 40 days        | PLBs proliferation                       | Nahar et al. 2011         |
| C. iridioides D. Don                | MS               | –             | 0.8% ag           | –                      | 0.5 mg/L BAP (shoot); 1 mg/L IBA (root)                              | 25±2 °C     | 16 h/ 8 h          | 8 wks          | Plantlet regeneration                    | Pant and Swar 2011        |
| C. finlaysonianum                   | MS               | –             | 0.6% ag           | –                      | 1.5 mg/L BAP + 0.75 mg/L NAA                                         | 25±2 °C     | 16 h/ 8 h          | 45 days        | Shoot regeneration                       | Islam et al. 2015         |
| Dendrobium orchid                   |                  |               |                   |                        |                                                                      |             |                    |                |                                          |                           |
| Dendrobium hybrid                   | MS               | 2% suc.       | 0.8% ag           | 1 g/L ac               | 1 mg/L NAA + 1 mg/L BAP                                              | 26±1 °C     | 16 h/ 8 h          | 60 days        | PLBs and plantlet regeneration           | Khatun H et al. 2010      |
| Dendrobium hybrid                   | MS               | 2% suc.       | 0.8% ag           | –                      | 1.0 mg/L IAA + 1.0 mg/L IBA                                          | 26±1 °C     | 16 h/ 8 h          | –              | Rooting                                  | Khatun M et al. 2010      |
| Dendrobium hybrid (Sonia 17 and 28) | 1/2 MS           | 2% suc.       | 0.7% ag           | –                      | 44.4 µM BA + 6.97 µM KIN                                             | 25±2 °C     | 16 h/ 8 h          | 60 days        | PLBs and shoot organogenesis             | Martin and Madassery 2006 |
|                                     | 1/2 MS           | 2% suc.       | 0.7% ag           | –                      | 0.44 µM BA (shoot); 2 g/L ac (root)                                  | 25±2 °C     | 16 h/ 8 h          | 60 days        | PLBs to shoots induction, root induction |                           |
| Dendrobium sp.                      | MS               | –             | –                 | –                      | 10 mg/L 2,4-D (PLBs); 0.5 mg/L BAP + 0.5 mg/L NAA (shoot)            | 25±1 °C     | –                  | 60 days        | PLBs and shoot regeneration              | Goswami et al. 2015       |
| Dendrobium sp.                      | MS               | 3% suc.       | 0.8% ag           | –                      | 2.5 mg/L NAA; 0.5 or 2.5 mg/L BAP                                    | 25±2 °C     | 16 h/ 8 h          | 30 & 60 days   | PLBs proliferation                       | Hossen et al. 2021        |
|                                     | MS               | 3% suc.       | 0.8% ag           | –                      | 0.5 mg/L KIN + 2.5 mg/L BAP + 0.5 mg/L NAA                           | 25±2 °C     | 16 h/ 8 h          | 45 days        | Shoot regeneration                       |                           |
|                                     | MS               | 3% suc.       | 0.8% ag           | –                      | 0.5 mg/L KIN + 2.5 mg/L BAP + 5 mg/L NAA                             | 25±2 °C     | 16 h/ 8 h          | 45 days        | Root induction                           |                           |
| D. densiflorum Lindl. ex Wall.      | MS               | 3% suc.       | 0.7% ag           | 100 mg/L MI            | 5 mg/L BAP + 0.1 mg/L NAA                                            | 25±2 °C     | 16 h/ 8 h          | 2 months       | PLBs proliferation                       | Luo et al .2008           |
|                                     | MS               | 3% suc.       | 0.7% ag           | 100 mg/L MI            | 2 mg/L BAP (shoot); 5 mg/L IBA + 5 g/L ac or 2 mg/L Nd (root)        | 25±2 °C     | 16 h/ 8 h          | –              | Shoot and root from PLB                  |                           |
| D. densiflorum Lindl.               | MS               | –             | 0.8% ag           | –                      | 2 mg/L BAP + 0.5 mg/L NAA (shoot); 1.5 mg/L IBA (root)               | 25±2 °C     | 16 h/ 8 h          | 12 wks         | Shoot and root proliferation             | Pradhan et al. 2013       |

|                                                         |            |         |          |                                                                                             |                                                                          |         |            |                                           |                                       |                           |
|---------------------------------------------------------|------------|---------|----------|---------------------------------------------------------------------------------------------|--------------------------------------------------------------------------|---------|------------|-------------------------------------------|---------------------------------------|---------------------------|
| <i>Dendrobium</i> cv. Sonia                             | 1/2 MS     | 3% suc. | 0.7% ag  | –                                                                                           | 1 mg/L BA                                                                | 25±2 °C | 16 h/ 8 h  | –                                         | PLBs multiplication                   | Sheela et al. 2006        |
| <i>D. nobile</i>                                        | MS         | 3% suc. | 0.8% ag  | –                                                                                           | 1 mg/L mT + 0.5 mg/L NAA + 0.8 mg/L Pu                                   | 25±2 °C | 12 h/ 12 h | 8 wks                                     | shoot proliferation                   | Bhattacharyya et al. 2016 |
| <i>D. nobile</i> var. Emma white                        | O753       | –       | –        | –                                                                                           | 2 mg/L BAP (shoot); 2 mg/L IBA (root)                                    | –       | –          | 6 wks                                     | Shoot and root proliferation          | Asghar et al. 2011        |
| <i>D. nobile</i> Lindl.                                 | MM         | 3% suc. | 0.7% ag  | 0.5 g/L MeI + 1 g/L Chl + 0.5 g/L L–gl + 250 mg/L Pt + 0.2 g/L <i>p</i> - ABC + 0.1 g/L Bio | 4 µg/L TRIA (PLB); 2 µg/L TRIA (shoot and root)                          | 25±3 °C | –          | 6~12 wks (PLB), 5~10 wks (shoot and root) | PLBs and shoot organogenesis          | Malabadi et al. 2005      |
| <i>D. nobile</i> Lindl.                                 | MS         | 3% suc. | 0.8% ag  | 100 mg/L MI                                                                                 | 11 µM BA (PLBs); 9.8 µM IBA (root)                                       | 25±1 °C | –          | 10 wks                                    | PLBs, root induction                  | Nayak et al. 2002         |
| <i>D. fimbriatum</i> Lindl. var. <i>oculatum</i> Hk. f. | mNS        | –       | 0.9% ag  | 10% cw + 0.5 mg/L Nia + 0.5 mg/L + PHCl + 0.1 mg/L T-HCl                                    | 0.5 mg/L NAA + 1 mg/L BAP                                                | 25±2 °C | 10 h/ 14 h | 8 wks (PLB)                               | Callus and shoot regeneration         | Roy and Banerjee 2003     |
| <i>D. fimbriatum</i> Lindl. var. <i>oculatum</i> Hk. f. | MM         | 3% suc. | 0.9% ag  | –                                                                                           | 2.4 mg/L (PLB formation); 4.8 mg/L KIN (shoot); 2.4 mg/L BAP (root)      | 25±2 °C | 16 h/ 8 h  | –                                         | PLBs, shoor-root generation           | Tikendra et al. 2021      |
| <i>D. palpebrae</i> Lindl.                              | MS         | –       | 0.8% ag  | –                                                                                           | 1 mg/L NAA + 2 mg/L BAP (in number); 1 mg/L Pic + 2 mg/L BAP (in length) | 25±2 °C | 14 h/ 10 h | –                                         | Multiple shoot bud initiations        | Bhowmik et al. 2020       |
| <i>D. candidum</i> Wall. Ex Lindl.                      | 1/2 MS, LM | 3% suc. | –        | 1 ml/L HYPONeX                                                                              | 2 mg/L BA + 0.1 mg/L NAA                                                 | 25±1 °C | 16 h/ 8 h  | 75 days                                   | Shoot regeneration                    | Shiau et al. 2005         |
| <i>D. candidum</i> Wall. Ex Lindl.                      | 1/2 MS     | 2% suc. | 0.6% ag  | –                                                                                           | 8.8 µM BA + 9.2 µM 2,4-D (callus); 1.08-2.7 µM NAA (Shoot)               | 25±2 °C | 12 h/ 12 h | 60 days                                   | Callus and shoot development          | Zhao et al. 2008          |
| <i>D. heterocarpum</i> Wall. ex Lindl.                  | MS         | 3% suc. | 0.8% ag  | –                                                                                           | 3 µM/L KIN + 12 µM/L NAA                                                 | 25±2 °C | 12 h/ 12 h | –                                         | Plantlet regeneration                 | Longchar and Deb 2022     |
| <i>D. primulinum</i> Lindl.                             | MS         | 3% suc. | 0.8% ag  | –                                                                                           | 1.5 mg/L BAP + 0.5 mg/L NAA (shoot); 0.5 mg/L IAA (root)                 | 25±2 °C | 16 h/ 8 h  | 24 wks (shoot), 16 wks (root)             | Shoot multiplication and rooting      | Pant and Thapa 2012       |
| <i>D. chrysotoxum</i> Lindl                             | MM         | 2% suc. | 0.9% ag  | –                                                                                           | 3.5 mg/L BAP + 0.5 mg/L IBA (shoot); 0.5 mg/L BAP + 3.0 mg/L IBA (shoot) | 25±2 °C | 12 h/ 12 h | –                                         | Plantlet regeneration                 | Tikendra et al. 2019      |
| <i>D. chrysanthum</i>                                   | MS         | –       | 0.8% ag  | –                                                                                           | 5 µM TDZ + 5 µM BAP (shoot); 10 µM NAA                                   | 25±2 °C | 12 h/ 12 h | 30 days                                   | Shooting and rooting                  | Hajong et al. 2013        |
| <i>D. thyrsiflorum</i>                                  | MS         | –       | -        | –                                                                                           | 2 mg/L of TDZ + 0.5 mg/L of NAA                                          | 25±1 °C | 12 h/ 12 h | 5 wks                                     | PLBs and indirect shoot organogenesis | Bhattacharyya et al. 2015 |
|                                                         | MS         | –       | 0.3% cg  | –                                                                                           | 2 mg/L 2iP + 0.5 mg/L IBA                                                | 25±1 °C | 12 h/ 12 h | –                                         | direct shoot organogenesis            |                           |
|                                                         | 1/2 MS     | –       | -        | –                                                                                           | 2 mg/L IBA + 0.6 mg/L NAA                                                | 25±1 °C | 12 h/ 12 h | –                                         | Root induction                        |                           |
| <i>D. wangliangii</i>                                   | 1/2 MS     | 2% suc. | 0.56% ag | –                                                                                           | 1 mg/L BA + 0.1 mg/L NAA                                                 | 22±2 °C | 16 h/ 8 h  | 90 days                                   | PLBs organogenesis                    | Zhao et al. 2013          |
|                                                         | 1/2 MS     | 2% suc. | 0.56% ag | –                                                                                           | 2 mg/L BA + 0.1 mg/L NAA                                                 | 22±2 °C | 16 h/ 8 h  | 70 days                                   | Shoot organogenesis                   |                           |
|                                                         | 1/2 MS     | 2% suc. | 0.56% ag | –                                                                                           | 2 mg/L of TDZ                                                            | 22±2 °C | 16 h/ 8 h  | –                                         | Inflorescences induction              |                           |
| <i>D. officinale</i>                                    | MS         | 3% suc. | 0.55% cn | –                                                                                           | 2 mg/L BA + 0.1 mg/L NAA                                                 | 26±2 °C | 12 h/ 12 h | 60 days                                   | Shoot multiplication                  | Chen et al. 2014          |
| <i>D. formosum</i>                                      | MS         | –       | –        | –                                                                                           | 1 mg/L 2,4-D (PLB); 2.5 mg/L BAP + 1 or 2 mg/L NAA (plantlets)           | 25±1 °C | 16 h/ 8 h  | 60 days                                   | PLBs proliferation and plantlet       | Nasiruddin et al. 2003    |
| <i>D. bensoniae</i>                                     | MS         | –       | –        | –                                                                                           | 1 mg/L BA + 1.5 mg/L IBA                                                 | 25±2 °C | 14 h/ 10 h | 60 days                                   | Shoot regeneration                    | Riva et al. 2016          |

|                                                                                  |        |         |          |                                                                                                                                       |                                                   |         |                                    |          |                                         |                                  |
|----------------------------------------------------------------------------------|--------|---------|----------|---------------------------------------------------------------------------------------------------------------------------------------|---------------------------------------------------|---------|------------------------------------|----------|-----------------------------------------|----------------------------------|
| <b>Phalaenopsis orchid</b> (reviewed at Khatun et al. 2020)                      |        |         |          |                                                                                                                                       |                                                   |         |                                    |          |                                         |                                  |
| <i>Phalaenopsis</i> cv. "Ph908"                                                  | NDM    | 2% suc. | 0.3% ag  | 0.1 g/L MI, 2 mg/L BA,                                                                                                                | 0.25 mg/L TDZ                                     | 25±2 °C | 0 h/ 24 h                          | 60 days  | PLB formation                           | Zanello and Cardoso 2019         |
| <i>Phalaenopsis</i> cv. "RP3"                                                    | NDM    | 2% suc. | 0.3% ag  | 1 mg/L NAA, 2 mg/L GA3                                                                                                                | 0.125 mg/L TDZ + 1 mg/L NAA + 20 mg/L BA          | 25±2 °C | 0 h/ 24 h                          | 60 days  | PLB formation                           |                                  |
| <i>P. amabilis</i> cv. "Blume"                                                   | NP     | –       | –        | –                                                                                                                                     | 3 mg/L TDZ + 1 mg/L NAA                           | 25±1 °C | 0 h/ 24 h (1st 14 days); 16 h/ 8 h | 8 wks    | Embryo formation                        | Mose et al. 2020                 |
| <i>P. amabilis</i> cv. "Surabaya"                                                | CM     | –       | –        | –                                                                                                                                     | 5 mg/L BAP + 2 mg/L NAA (PLBs); 2 mg/L NAA (root) | 25±1 °C | 16 h/ 8 h                          | 160 days | PLBs formation and rooting              | Balilashaki et al. 2015          |
| <i>P. amabilis</i> var. <i>formosa</i>                                           | 1/2 MS | 2% suc. | 0.22% gr | 100 mg/L MI + 0.5 mg/L Nia + 0.5 mg/L + PHCl + 0.1 mg/L T–HCl + 2 mg/L gly + 1000 mg/L Pt + 170 mg/L NaH <sub>2</sub> PO <sub>4</sub> | 3 mg/L TDZ                                        | 26±1 °C | 16 h/ 8 h                          | 45 days  | Embryo formation                        | Chen and Chang 2006              |
| <i>P. amabilis</i> Shimadzu var. <i>formosa</i> and <i>Phalaenopsis</i> "Nebula" | 1/2 MS | 2% suc. | 0.22% gr | 100 mg/L MI + 0.5 mg/L Nia + 0.5 mg/L + PHCl + 0.1 mg/L T–HCl + 2 mg/L gly + 1000 mg/L Pt + 170 mg/L NaH <sub>2</sub> PO <sub>4</sub> | 4 mg/L TDZ (embryo); 0.5 mg/L of BA (plantlet)    | 26±1 °C | 0 h/ 24 h                          | 60 days  | Embryo formation and plantet generation | Gow et al. 2009; Gow et al. 2010 |
| <i>P. gigantea</i>                                                               | NDM    | –       | –        | –                                                                                                                                     | 1 mg/L NAA + 0.1 mg/L TDZ                         | 25±2 °C | –                                  | 6 wks    | Callus and PLBs formation               | Niknejad et al. 2011             |
| <i>Phalaenopsis</i> "Little Steve"                                               | 1/2 MS | 2% suc. | 0.22% gr | 100 mg/L MI + 0.5 mg/L Nia + 0.5 mg/L + PHCl                                                                                          | 4.54 µM TDZ                                       | 26±1 °C | 0 h/ 24 h                          | 30 days  | Embryo formation                        | Kuo et al. 2005                  |

|                                                |        |         |          |                                                                                          |                                                     |         |            |         |                                            |                           |
|------------------------------------------------|--------|---------|----------|------------------------------------------------------------------------------------------|-----------------------------------------------------|---------|------------|---------|--------------------------------------------|---------------------------|
|                                                |        |         |          | + 0.1 mg/L T–HCl + 2 mg/L gly + 1000 mg/L Pt + 170 mg/L NaH <sub>2</sub> PO <sub>4</sub> |                                                     |         |            |         |                                            |                           |
| <i>P. amabilis</i> BL. cv. "Golden Horizon"    | 1/2 MS | 2% suc. | 0.22% gr | 10% cw + 2 g/L Pt + 1 g/L ac + 150 mg/L L–gl                                             | 2 mg/L BA + 0.5 mg/L NAA                            | 24±1 °C | 16 h/ 8 h  | 12 wks  | PLBs                                       | Sinha and Jahan 2011      |
| <i>P. cornu-cervi</i> (Breda) Blume & Rchb. f. | 1/2 MS | –       | –        | –                                                                                        | 0.1 mg/L TDZ + 0.1 mg/L NAA (PLB)                   | 25±1 °C | 16 h/ 8 h  | 45 days | PLBs                                       | Rittirat et al. 2012      |
|                                                | MS     | –       | –        | –                                                                                        | 15% cw + 0.2% ac (root)                             | 25±1 °C | 16 h/ 8 h  | 45 days | Root induction                             |                           |
| <b>Oncidium orchid</b>                         |        |         |          |                                                                                          |                                                     |         |            |         |                                            |                           |
| <i>Oncidium</i> sp. "Dancing Dolls"            | MS     | –       | 0.8% ag  | –                                                                                        | 2 mg/L BAP + 1.5 mg/L NAA                           | 25±1 °C | 12 h/ 12 h | –       | Shoot and root organogenesis               | Kalimuthu et al. 2007     |
| <i>O. sp.</i> "Gower Ramsey"                   | 1/2 MS | 2% suc. | 0.22% gr | 100 mg/L MI + 2 mg/L gly + 1000 mg/L Pt + 170 mg/L NaH <sub>2</sub> PO <sub>4</sub>      | 0.1 µM TIBA or 0.5 µM TIBA                          | 26±1 °C | 16 h/ 8 h  | 8 wks   | Embryo formation                           | Chen et al. 2004          |
| <i>O. tigrinum</i> Llave & Lex.                | MS     | 3% suc. | 0.8% ag  | –                                                                                        | 1-2 mg/L BA + 0.1 mg/L NAA (shoot); 1 g/L ac (root) | 25±1 °C | 16 h/ 8 h  | 90 days | Shoot and root induction                   | Mata-Rosas et al. 2011    |
| <i>O. flexuosum</i> Sims                       | MS     | 3% suc. | 0.5% ag  | –                                                                                        | 1.5 µM TDZ                                          | 25±2 °C | 0 h/ 24 h  | 90 days | PLBs regeneration                          | Mayer et al. 2010         |
| <b>Vanda orchid</b>                            |        |         |          |                                                                                          |                                                     |         |            |         |                                            |                           |
| <i>Vanda tessellata</i> (Roxb.) Hook. ExG.Don  | MS     | 3% suc. | ag       | –                                                                                        | 1.5 mg/L BAP + 0.5 mg/L NAA                         | 25±2 °C | 16 h/ 8 h  | 30 days | Seedlings development and shoot elongation | Bhattacharjee et al. 2014 |

|                                                    |        |            |          |                                                                                |                                                                       |          |            |                |                                              |                       |
|----------------------------------------------------|--------|------------|----------|--------------------------------------------------------------------------------|-----------------------------------------------------------------------|----------|------------|----------------|----------------------------------------------|-----------------------|
|                                                    | MS     | 3% suc.    | ag       | –                                                                              | 1 mg/L BAP + 1 mg/L NAA                                               | 25±2 °C  | 16 h/ 8 h  | 28-35 days     | Shoot induction                              |                       |
|                                                    | 1/2 MS | 3% suc.    | ag       | –                                                                              | 1 mg/L IAA                                                            | 25±2 °C  | 16 h/ 8 h  | –              | Root induction                               |                       |
| <i>V. coerulea</i> Griff ex.Lindl.<br>(Blue Vanda) | P0931  | 3% suc.    | 0.7% ag  | 3 g/L ac                                                                       | 5.36 µM + 3.80 µM                                                     | 24±2 °C  | 16 h/ 8 h  | 8 wks          | PLBs proliferation                           | Roy et al. 2011       |
| <i>V. spathulata</i> Spreng                        | MM     | 2% suc.    | 0.6% ag  | –                                                                              | 2:1µM BA:IAA                                                          | 28±2 °C  | 12 h/ 12 h | 3 months       | Shoot multiplication                         | Decruse et al. 2003   |
| <b>Coelogyne orchid</b>                            |        |            |          |                                                                                |                                                                       |          |            |                |                                              |                       |
| <i>Coelogyne cristata</i>                          | 1/2 MS | 3% suc.    | 0.8% ag  | –                                                                              | 0.44 mg/L TDZ                                                         | 22~25 °C | –          | 60 days        | Shoot induction from shoot axis              | Naing et al. 2010     |
| <i>C. cristata</i>                                 | 1/2 MS | 3% suc.    | 0.8% ag  | –                                                                              | 1 mg/L NAA + 2 mg/L BA                                                | 22~25 °C | –          | 8 wks          | Shoot induction from pseudobulb              |                       |
| <i>C. ovalis</i>                                   | KC     | 3% suc.    | 0.8% ag  | –                                                                              | 10 µM mT + 0.5 µM NAA; 15 µM BAP + 0.5 µM NAA                         | 25±2 °C  | 16 h/ 8 h  | 45 days        | Shoot and PLBs – induction and proliferation | Singh et al. 2020     |
| <i>C. flaccida</i>                                 | MS     | –          | 0.8% ag  | –                                                                              | 4.44 µM NAA + 5.37 µM BA                                              | 25±2 °C  | 12 h/ 12 h | –              | Pseudobulb segments regeneration             | Kaur and Bhutani 2013 |
| <i>C. flaccida</i>                                 | MS     | –          | –        | –                                                                              | 2 mg/L NAA + 2 mg/L KIN                                               | 20±2     | 16 h/ 8 h  | 15 wks         | Plantlets regeneration                       | Kalyan and Sil 2015   |
| <b>Bulbophyllum orchid</b>                         |        |            |          |                                                                                |                                                                       |          |            |                |                                              |                       |
| <i>Bulbophyllum auricomum</i> Lindl.               | MS     | 3% suc.    | 0.8% ag  | 15% cw                                                                         | 2 mg/L BAP + 1.0 mg/L NAA                                             | 25±2 °C  | 16 h/ 8 h  | 1 and 2 months | Callus induction and PLB proliferation       | Aung et al. 2022      |
| <i>B. odoratissimum</i>                            | MS     | 3% suc.    | 0.8% ag  | –                                                                              | 4 mg/L BA + 0.5 mg/L IBA                                              | 25±2 °C  | 16 h/ 8 h  | 12 wks         | Shoot multiplication                         | Prasad et al. 2021    |
| <b>Paphiopedilum orchid</b>                        |        |            |          |                                                                                |                                                                       |          |            |                |                                              |                       |
| <i>Paphiopedilum rothschildianum</i>               | 1/2 MS | 3% suc.    | 3% gr    | –                                                                              | 4.0 µM KIN                                                            | 25±2 °C  | 0 h/ 24 h  | 8 wks          | PLB formation                                | Ng et al. 2011        |
| <i>P. rothschildianum</i>                          | 1/2 MS | 58 mM suc. | 0.22% gr | full-strength MS vitamins, 2 g/L Pt, 170 mg/L NaH <sub>2</sub> PO <sub>4</sub> | 13.56 µM 2,4-D + 4.54 µM TDZ                                          | 25±2 °C  | 0 h/ 24 h  | 90 days        | PLB formation                                | Masnoddin et al. 2016 |
| <b>Other genus of orchid</b>                       |        |            |          |                                                                                |                                                                       |          |            |                |                                              |                       |
| <i>Guarianthe skinneri</i> "Bateman"               | MS     | 3% suc.    | 0.25% pg | 0.1 g/L MI + 0.05 g/L NaHPO <sub>4</sub>                                       | 16.1 µM NAA; 17.1 µM IAA; 6.3 x 10 <sup>-9</sup> µM GA3; 0.0023 µM BA | 25~27 °C | 16 h/ 8 h  | 2 month        | Shoot regeneration                           | Coello et al. 2010    |

|                                       |           |         |          |                                          |                                                                            |          |            |          |                                            |                     |
|---------------------------------------|-----------|---------|----------|------------------------------------------|----------------------------------------------------------------------------|----------|------------|----------|--------------------------------------------|---------------------|
|                                       | MS        | 3% suc. | 0.25% pg | 0.1 g/L MI + 0.05 g/L NaHPO <sub>4</sub> | 5.4 µM NAA; 17.1 µM IAA; 0.001 µM GA3; 4.6 x 10 <sup>-9</sup> µM BA (root) | 25~28 °C | 16 h/ 8 h  | 3 months | Root regeneration                          |                     |
| <i>Orchis catasetum</i>               | MS        | 3% suc. | 0.8% ag  | -                                        | 0.5 mg/L BA + 0.5 mg/L NAA                                                 | 24±2 °C  | 16 h/ 8 h  | 60 days  | PLBs proliferation & plantlet regeneration | Baker et al. 2014   |
| <i>Eulophia dabia</i> (D. Don) Hochr. | MS        | 2% suc. | 0.9% ag  | 0.2% ac                                  | 1 mg/L BAP 0.5 mg/L NAA; 0.1 or 1 mg/L TDZ (for PLBs)                      | 25±2 °C  | 12 h/ 12 h | –        | Plantlet regeneration                      | Chauhan et al. 2015 |
| <i>Grammatophyllum speciosum</i>      | 1/2 MS-LM | 2% mal. | –        | –                                        | –                                                                          | 25±2 °C  | 16 h/ 8 h  | 2 months | PLBs and shoot formation                   | Sopalun et al. 2010 |
|                                       | 1/2 MS-LM | 2% suc. | –        | –                                        | 15 mg/L Ch                                                                 | 25±2 °C  | 16 h/ 8 h  | 2 months | PLBs and shoot formation                   |                     |



|                                                                                         |        |               |          |                                                            |                                                           |           |            |                                     |                                         |                        |
|-----------------------------------------------------------------------------------------|--------|---------------|----------|------------------------------------------------------------|-----------------------------------------------------------|-----------|------------|-------------------------------------|-----------------------------------------|------------------------|
|                                                                                         | 1/2 MS | 2% suc.       | –        | –                                                          | 2.0 mg/l NAA + 1.0 mg/l BA                                | 25±2 °C   | 16 h/ 8 h  | 2 months                            | PLBs and shoot formation                |                        |
| <i>Dimorphorchis lowi</i>                                                               | KC     | 2% suc.       | 0.8% ag  | –                                                          | 2 mg/L KIN (shoot); 1 mg/L IAA + 0.5 mg/L IBA (root)      |           | 24 h/ 0 h  | 180 days                            | Shoot and root regeneration             | Jainol and Gansau 2016 |
| <i>Serapias vomeracea</i>                                                               | KC     | 2% suc.       | 0.35% pg | –                                                          | 0.5 mg/L JA; 0.5 mg/L O-Ch                                | 23±1 °C   | 16 h/ 8 h  | 90 days                             | PLB formation                           | Acemi et al. 2020      |
|                                                                                         | KC     | 2% suc.       | 0.35% pg | –                                                          | 15-20 mg/L P-Ch                                           | 23±1 °C   | 16 h/ 8 h  | 180 days                            | Shoot induction                         |                        |
|                                                                                         | KC     | 2% suc.       | 0.35% pg | –                                                          | 10 mg/L O-Ch, 15 mg/L P-Ch                                | 23±1 °C   | 16 h/ 8 h  | 180 days                            | Root induction                          |                        |
|                                                                                         | KC     | 2% suc.       | 0.35% pg | –                                                          | 0.5 mg/L JA; 10 mg/L O-Ch                                 | 23±1 °C   | 16 h/ 8 h  | 180 days                            | Tuberization                            |                        |
| <i>Rhynchosstylis retusa</i>                                                            | VW     | 2% suc.       | –        | –                                                          | 0.1 mg/L NAA + 1 mg/L KIN or BAP                          | 25±1 °C   | 14 h/ 10 h | –                                   | Callus, PLBs, plantlets                 | Sunitibala et al. 2018 |
| Hybrid ( <i>Aranda</i> Wan Chark Kuan "Blue" × <i>Vanda coerulea</i> Griff. ex. Lindl.) | MS     | 3% suc.       | – gr     | 100 mg/L MI                                                | 1.5 mg/L TDZ (PLB); 1.0 mg/L BA + 0.5 m/L IBA (Plantlets) | 25±1 °C   | 14 h/ 10 h | 40 (PLBs), and 30 (pplantlets) days | PLB induction and plantlets generations | Gantait et al. 2012    |
| <i>Esmeralda clarkei</i> Rchb. f.                                                       | MS     | –             | 0.8% ag  | –                                                          | 1 mg/L BAP (shoot); 1 mg/L NAA (root)                     | 25±2 °C   | 16 h/ 8 h  | 120 days                            | Shoot multiplication and rooting        | Paudel and Pant 2012   |
| <i>Aenhenrya rotundifolia</i> (Blatt.) C.S. Kumar and F.N. Rasm.                        | MM     | 2% suc.       | 0.7% ag  | –                                                          | 6.20 µM mT + 2.25 µM TDZ; 6.20 µM mT + 5.37 µM NAA        | 23±2 °C   | 16 h/ 8 h  | 4 wks                               | shoot proliferation                     | Sherif et al. 2020     |
| <i>Caladenia huegelii</i>                                                               | 1/2 MS | 60 mM suc.    | 0.8% ag  | 500 µM MI + 500 µM MES + 1 µM T-HCl + 2.5 µM pyr + 4 µM NA | 5 µM NAA + 2 µM BA                                        | 20±0.5 °C | –          | –                                   | PLB proliferation                       | Bustam et al. 2016     |
| <i>Cyrtopodium paludicolum</i>                                                          | KC     | 58.43 mM suc. | 0.4% ag  | –                                                          | 1.34 µM NAA + 2.27 µM TDZ                                 | 27±2 °C   | 16 h/ 8 h  | –                                   | PLBs proliferation from root tip        | Picolotto et al. 2017  |
| <i>Ansellia africana</i> Lindl                                                          | MS     | 3% suc.       | 0.8% ag  | –                                                          | 0 µM mT + 5 µM NAA +15 µM IBA + 30 µM PG                  | 25±2 °C   | 12 h/ 12 h | 10 wks                              | Shoots with roots organogenesis         | Saleh-E-In et al. 2021 |
| <i>Tolumnia</i> Snow Fairy                                                              | 1/2 MS | 3% suc.       | 0.8% ag  | 100 mg/L MI + 170 mg/L NaH <sub>2</sub> PO <sub>4</sub>    | 4 mg/L BA                                                 | 25±2 °C   | 12 h/ 12 h | 16 wks                              | PLBs organogenesis                      | Chookoh et al. 2019    |
| <i>Cyrtopodium paranaense</i>                                                           | MS     | 3.5% suc.     | 1% ag    | –                                                          | 0.2 µM IAA + 9 µM TDZ                                     | 25-27 °C  | 0 h/ 24 h  | 3 wks                               | PLBs organogenesis                      | Guo et al. 2010        |
| <i>Brassavola nodosa</i> "Remar" x "Mas Mejor" hybrid                                   | 1/2 MS | 3% suc.       | 0.7% ag  | 2 mg/L gly + 0.1 mg/L NAA + 30% cw                         | 2 mg/L BA + 3 mg/L adenine sulfate                        | 26±4 °C   | 16 h/ 8 h  | 45 days                             | Shoot multiplication                    | Xu et al. 2022         |
|                                                                                         | 1/2 MS | 3% suc.       | 0.7% ag  | 2 mg/L gly + 0.1 mg/L NAA + 30% cw                         | 0.5 mg/L NAA or 1 mg/L IBA                                | 26±4 °C   | 16 h/ 8 h  | 45 days                             | Root induction                          |                        |
| Lily                                                                                    |        |               |          |                                                            |                                                           |           |            |                                     |                                         |                        |
| <i>Cyrtanthus contractus</i> (Fire lily)                                                | MS     | 3% suc.       | 0.8% ag  | 0.1 g/L MI                                                 | 4.4 µM BA + 1.1 µM NAA                                    | 25±2 °C   | 16 h/ 8 h  | 8 wks                               | Shoot induction                         | Ncube et al. 2015      |
| <i>C. guthrieae</i> (Berg lily)                                                         | MS     | 3% suc.       | 0.8% ag  | 0.1 g/L MI                                                 | 4.4 µM BA + 1.1 µM NAA                                    | 25±2 °C   | 16 h/ 8 h  | 8 wks                               | Shoot induction                         |                        |
| <i>C. obliquus</i> (Knysna Lily)                                                        | MS     | 3% suc.       | 0.8% ag  | 0.1 g/L MI                                                 | 6.7 µM BA + 2.7 µM NAA                                    | 25±2 °C   | 16 h/ 8 h  | 8 wks                               | Shoot induction                         |                        |
| <i>C. contractus</i> (Fire lily)                                                        | MS     | 3% suc.       | 0.8% ag  | 0.1 g/L MI                                                 | 4.4 µM BA + 1.1 µM NAA + 10 µM TDZ                        | 25±2 °C   | 16 h/ 8 h  | 8 wks                               | Shoot organogenesis                     |                        |
| <i>C. guthrieae</i> (Berg lily)                                                         | MS     | 3% suc.       | 0.8% ag  | 0.1 g/L MI                                                 | 4.4 µM BA + 1.1 µM NAA                                    | 25±2 °C   | 16 h/ 8 h  | 8 wks                               | Shoot organogenesis                     |                        |
| <i>C. obliquus</i> (Knysna Lily)                                                        | MS     | 3% suc.       | 0.8% ag  | 0.1 g/L MI                                                 | 6.7 µM BA + 2.7 µM NAA + 10 µM BA                         | 25±2 °C   | 16 h/ 8 h  | 8 wks                               | Shoot organogenesis                     |                        |
| <i>Hemerocallis</i> sp (19 Day lily cultivars)                                          | MS     | –             | 0.4% pg  | –                                                          | 1 , 5 or 10 mg/L TDZ                                      | –         | –          | 69 days                             | Shoot organogenesis                     | Matand et al. 2020     |

**Oriental lily**

|                                                            |    |         |         |              |                                                        |         |           |          |                               |                            |
|------------------------------------------------------------|----|---------|---------|--------------|--------------------------------------------------------|---------|-----------|----------|-------------------------------|----------------------------|
| <i>Lilium orientalis</i> cv. "Starfighter" (Oriental lily) | MS | 3% suc. | 0.7% ag | –            | 0.5 mg/L TDZ + 10 mg/L 2,4-D                           | 23±2 °C | 16 h/ 8 h | 1 month  | Shoot organogenesis           | Youssef et al. 2019        |
|                                                            | MS | 3% suc. | 0.7% ag | –            | 0.5 mg/L 2ip + 5 mg/L Pic + 1.0 mg/L BA + 0.2 mg/L NAA | 23±2 °C | 16 h/ 8 h | 3 months | Shoots multiplication         |                            |
|                                                            | MS | 6% suc. | 0.7% ag | 3-6 mg/L pac | –                                                      | 23±2 °C | 16 h/ 8 h | –        | Bulblet formation             |                            |
| <i>Lilium</i> oriental hybrid cv. "Casablanca"             | MS | –       | –       | –            | 0.5 mg/L BA + 0.4 mg/L BA NAA                          | –       | –         | –        | adventitious bud regeneration | Javaheri and Kaviani, 2022 |
| <i>Lilium</i> oriental hybrid cv. "Casablanca"             | MS | 9% suc. | – pg    | ac           | 0.5 mg/L BA                                            | 25±2 °C | 16 h/ 8 h | 8 wks    | Shoot proliferation           | Han et al. 2005            |

|                                            |    |         |          |                                                                              |                                     |         |           |            |                                     |                          |
|--------------------------------------------|----|---------|----------|------------------------------------------------------------------------------|-------------------------------------|---------|-----------|------------|-------------------------------------|--------------------------|
| <b>Tulip</b>                               |    |         |          |                                                                              |                                     |         |           |            |                                     |                          |
| <i>T. gesneriana</i> cv. "Apeldoorn"       | MS | 3% suc. | 0.8% ag  | –                                                                            | 25 or 50 µM Pic + 25 or 50 mg/L TDZ | 20±2 °C | –         | 4 wks      | Callus induction and multiplication | Ptak and Bach 2007       |
|                                            | MS | 3% suc. | 0.8% ag  | –                                                                            | 5 µM BA + 0.5 µM NAA                | 20±2 °C | –         | –          | Plantlet regeneration               |                          |
| <i>T. gesneriana</i> cv. "Apeldoorn"       | MS | 3% suc. | 0.8% bag | 10 mg/L thi + 1 mg/L pyr + 5 mg/L NA + 10 mg/L gly + 100 mg/L glu + 1g/L Chl | 10 mg/L NAA + 0.1~0.5 mg/L TDZ      | 20 °C   | 0 h/ 24 h | 60 days    | Callus induction                    | Podwyszyńska et al. 2020 |
| <i>T. gesneriana</i> cv. "Prominence"      | MS | 3% suc. | 0.8% bag | Same to above                                                                | 2.5 mg/L Pic + 0.1 mg/L TDZ         | 20 °C   | 0 h/ 24 h | 60 days    | Callus induction                    |                          |
| <i>Tulipa gesneriana</i> cv. "Blue Parrot" | MS | 3% suc. | 0.8% bag | Same to above                                                                | 10 mg/L NAA                         | 20 °C   | 0 h/ 24 h | 60 days    | Callus induction                    |                          |
| <i>T. suaveolens</i>                       | MS | –       | –        | –                                                                            | 0.5 mg/L BAP + 1 mg/L NAA           | 25±1 °C | 16 h/ 8 h | 2.5 months | Shoot formation                     | Kritskaya et al. 2019    |
| <i>T. tarda</i> cv. "Stapf. "              | MS | 3% suc. | 0.5% ag  | –                                                                            | 0.5 µM BAP                          | 20 °C   | 0 h/ 24 h | 12 wks     | Callus induction                    | Maślanka et al. 2014     |
|                                            | MS | 6% suc. | 0.5% ag  | –                                                                            | 0.5 µM BAP                          | 20 °C   | 0 h/ 24 h | 12 wks     | Bulb formation                      |                          |
| <i>T. gesneriana</i> cv. "Arma"            | MS | 3% suc. | 0.75% pa | –                                                                            | 1.5 mg/L BA                         | 25±2 °C | –         | 4 wks      | Bulb formation                      | Ibrahim and Draaj 2020   |
| <i>T. gesneriana</i> cv. "Flaming flag"    | MS | 3% suc. | 0.75% pa | –                                                                            | 1.5 mg/L BA                         | 25±2 °C | –         | 4 wks      | Bulb formation                      |                          |

|                                         |        |           |          |                        |                                                        |         |           |                |                          |                            |
|-----------------------------------------|--------|-----------|----------|------------------------|--------------------------------------------------------|---------|-----------|----------------|--------------------------|----------------------------|
| <b>Rose</b>                             |        |           |          |                        |                                                        |         |           |                |                          |                            |
| Rose                                    | MS     | 3% suc.   |          | 400 mg/L MI            | 0.5 mg/L TDZ + 0.1 mg/LNAA; 0.5 mg/L ZT + 0.1 mg/L NAA | 25±2 °C | 16 h/ 8 h | 25,45, 60 days | Flower induction         | Wang et al. 2002           |
| Hybrid <i>Rosa</i> sp.                  | MS     | 3% suc.   | 0.6% ag  | 1 mg/L GA <sub>3</sub> | 3 mg/L BAP                                             | 26±1 °C | -         | -              | Shoot induction          | Oo et al. 2021             |
|                                         | 1/2 MS | 1.5% suc. | 0.5% ag  | –                      | 1 mg/L NAA                                             | 26±1 °C | -         | -              | Root induction           |                            |
| <i>Rosa hybrida</i> cv. Eiffel Tower    | MS     | 3% suc.   | 0.8% ag  | –                      | 1 mg/L BAP + 0.5 mg/L KIN                              | 25±2 °C | 16 h/ 8 h | 4 wks          | Shoot multiplication     | Tawfik et al. 2018         |
|                                         | 1/2 MS | 5% suc.   | 0.8% ag  | –                      | –                                                      | 25±2 °C | 16 h/ 8 h | 20 days        | Root induction           |                            |
| <i>Rosa hybrida</i>                     | MS     | -         | 0.8% ag  | –                      | 3 mg/L BAP                                             | 25±3 °C | -         | 3 wks          | Shoot induction          | Tirkey et al. 2019         |
| <i>Rosa hybrida</i>                     | MS     | 3% suc.   | 0.75% ag | 0.3 g/L ac             | 3 mg/L BAP + 1 mg/L NAA + 0.5 mg/L GA                  | –       | –         | –              | Shoot proliferation      | Khaskheli et al. 2018      |
|                                         | MS     | 3% suc.   | 0.75% ag | 0.3 g/L ac             | 3 mg/L IAA                                             | –       | –         | –              | Root induction           |                            |
| <i>Rosa hybrida</i> cv. Red Masterpiece | MS     | 3% suc.   | 0.82% ag | –                      | 3 mg/L BA + 1 mg/L KIN                                 | 25±1 °C | 16 h/ 8 h | 3 wks          | Multiple shoot induction | Kanchanapoom et. al. 2009) |

|                                  |        |           |          |                                                                             |                                                      |         |           |            |                          |                           |
|----------------------------------|--------|-----------|----------|-----------------------------------------------------------------------------|------------------------------------------------------|---------|-----------|------------|--------------------------|---------------------------|
| <i>Rosa hybrida</i> cv. Heirloom | MS     | 3% suc.   | 0.82% ag | –                                                                           | 13.3 mM BA + 9.3 mM KIN                              | 25±1 °C | 16 h/ 8 h | 3 wks      | Multiple shoot induction | Kanchanapoom et. al. 2010 |
| <i>Rosa</i> sp.                  | MS     | 3% suc.   | 0.7% ag  | –                                                                           | 4 mg/L 2,4-D                                         | 26±1 °C | 16 h/ 8 h | 28-30 days | Callus induction         | Afrin et al. 2022         |
|                                  | MS     | 3% suc.   | 0.7% ag  | –                                                                           | 2 mg/L BAP + 0.5 mg/L KIN                            | 26±1 °C | 16 h/ 8 h | 26-28 days | Shoot regeneration       |                           |
|                                  | MS     | 3% suc.   | 0.7% ag  | –                                                                           | 2 mg/L BAP + 0.5 mg/L KIN + 0.1 mg/L GA3             | 26±1 °C | 16 h/ 8 h | 28 days    | Shoot proliferation      |                           |
|                                  | 1/2 MS | 3% suc.   | 0.7% ag  | –                                                                           | 1 mg/L IBA + 1 mg/L NAA                              | 26±1 °C | 16 h/ 8 h | 15-18 days | Root induction           |                           |
| <i>Rosa</i> sp. cv. Konstancin   | MS     | 1.9% suc. | 0.3% ag  | 100 mg/L MI + 1 mg/L NA + 1 mg/L pyr + 1 mg/L thi + 2 mg/L gly + 10 mg/L AA | 2.2 µM BAP + 0.3 µM GA <sub>3</sub>                  | 23±2 °C | 16 h/ 8 h | 3 wks      | Shoot induction          | Wojtania et al. 2018      |
|                                  | MS     | 1.2% suc. | 0.3% ag  |                                                                             | 3.1 µM BAP + 0.9 µM GA <sub>3</sub> + 138 µM Fe-EDTA | 23±2 °C | 16 h/ 8 h | 5 wks      | Shoot multiplication     |                           |
| <i>Rosa indica</i>               | MS     | 3% suc.   | –        | –                                                                           | 2 or 4 mg/L 2,4-D                                    | 25±2 °C | 16 h/ 8 h | 3 wks      | Callus induction         | Ali et al. 2018           |
|                                  | MS     | 3% suc.   | –        | –                                                                           | 3 mg/L BAP + 3 mg/L IAA                              | 25±2 °C | 16 h/ 8 h | 3 wks      | Shoot regeneration       |                           |
| <i>Rosa indica</i>               | MS     | –         | –        | –                                                                           | 1.5 mg/L BAP or 0.5~1 mg/L BAP + 0.5 mg/L KIN        | 25±2 °C | 16 h/ 8 h | 12 days    | Shoot induction          | Shabbir et al. 2009       |
|                                  | MS     | –         | –        | –                                                                           | 0.5~1 mg/L BAP + 0.5 mg/L KIN                        | 25±2 °C | 16 h/ 8 h | 12 days    | Shoot multiplication     |                           |
| Rose                             | MS     | 3% suc.   | 0.5% gr  | –                                                                           | 3 mg/L BAP + 3 mg/L IAA                              | –       | 16 h/ 8 h | 4-5 weeks  | Shoot organogenesis      | Chhalgri et al. 2020      |

|                                              |                  |            |          |             |                                                        |                                                |               |             |                                        |                         |
|----------------------------------------------|------------------|------------|----------|-------------|--------------------------------------------------------|------------------------------------------------|---------------|-------------|----------------------------------------|-------------------------|
| <i>Rosa</i> sp. cv. Red Eden (climbing rose) | MS               | 3% suc.    | 0.8% ag  | –           | 0.5 mg/L BA + 0 mg/L NAA                               | 26±2 °C                                        | –             | 30 days     | Shoot multiplication                   | Quynh and Pha 2020      |
| Damask rose                                  |                  |            |          |             |                                                        |                                                |               |             |                                        |                         |
| <i>Rosa damascena</i>                        | MS               | –          | –        | –           | 4 mg/L BA + 0.1 mg/L NAA (Shoot); 0.5 mg/L NAA (Root)  | –                                              | –             | 4 weeks     | Shoot and root induction               | Maheswari et al. 2018   |
| <i>R. damascena</i> cv. Azaran               | mMS <sup>3</sup> | –          | –        | –           | 1~2 mg/L BA + 0.1 mg/L GA <sub>3</sub> + 0.1 mg/L NAA  | 23±3 °C                                        | 16 h/ 8 h     | every 4 wks | Shoot proliferation and multiplication | Nikbakht et al. 2005    |
| <i>R. damascena</i> cv. Ghamsar              | mMS <sup>3</sup> | –          | –        | –           | 1~2 mg/L BA + 0.1 mg/L GA <sub>3</sub>                 | 23±3 °C                                        | 16 h/ 8 h     | every 4 wks | Shoot proliferation and multiplication |                         |
| <i>R. damascena</i>                          | MS               | 0.18% suc. | 0.8% ag  | –           | 5 µM BA + 1 µM TDZ                                     | 25±1 °C                                        | 14 h/ 10 h    | 48 wks      | Shoot organogenesis                    | Kumar et al 2001        |
| <i>R. damascena</i> cv. Almarah              | MS               | 3% suc.    | 0.8% ag  | 3 g/L ac    | 2 mg/L BA + 2 mg/L GA <sub>3</sub>                     | –                                              | –             | –           | Shoot organogenesis                    | Alsemaan 2013           |
| <i>R. damascena</i>                          | MS               | 3% suc.    | 0.8% ag  | –           | 2.5~3 mg/L BA + 0.1 mg/L IBA                           | 25 ± 5 °C                                      | 16 h/ 8 h     | –           | Shoot organogenesis                    | Jabbarzadeh et al. 2005 |
| <i>R. damascena</i> cv. Kashan               | MS               | –          | –        | 100 mg/L AA | 3 mg/L BAP                                             | –                                              | –             | –           | Shoot proliferation                    | Mirzaei et al. 2019     |
| Yasooj aromatic rose                         | MS               | –          | –        | 100 mg/L AA | 3 mg/L BAP; 1.5 mg/L BAP + 1.5 mg/L 2ip + 0.1 mg/L IBA | –                                              | –             | –           | Shoot proliferation                    |                         |
| Kashan damask rose × Yasooj aromatic rose    | MS               | –          | –        | 100 mg/L AA | 3 mg/L BAP                                             | –                                              | –             | –           | Shoot proliferation                    |                         |
| Yasooj aromatic rose                         | MS               | –          | –        | 100 mg/L AA | 2 mg/L NAA                                             | –                                              | –             | –           | Root induction                         |                         |
| China rose                                   |                  |            |          |             |                                                        |                                                |               |             |                                        |                         |
| <i>Rosa chinensis</i> Jacq. var.             | MS               | 4%         | suc. – – | 1.5 mg/L    | TDZ 25±2 °C 16 h/ 8 h                                  | 4 wks Shoot organogenesis Tibkwang et al. 2018 | <i>minima</i> | <i>voss</i> |                                        |                         |
| Tuberose                                     |                  |            |          |             |                                                        |                                                |               |             |                                        |                         |
| <i>Polianthes tuberosa</i>                   | MS               | –          | –        | –           | 0.5 mg/L IAA + 1 mg/L KIN                              | 25±1 °C                                        | 16 h/ 8 h     | 60 days     | Plantlet regeneration                  | Ali et al. 2015         |
| <i>P. tuberosa</i>                           | MS               | –          | –        | –           | 0.1 mg/L IAA + KIN                                     | 25±1 °C                                        | 16 h/ 8 h     | 60 days     | Plantlet regeneration                  | Ali et al. 2014         |
| <i>P. tuberosa</i>                           | MS               | –          | –        | –           | 0.25 mg/L BAP + 0.25 mg/L KIN                          | –                                              | –             | –           | Shoot regeneration                     | Daneshvar et al. 2022   |
|                                              | MS               | –          | –        | –           | 0.2 mg/L IBA + 0.5 mg/L NAA                            | –                                              | –             | –           | Root induction                         |                         |
| <i>P. tuberosa</i>                           | MS               | 3% suc.    | 0.8% ag  | –           | 4 mg/L BAP + 0.1 mg/L NAA                              | 25±2 °C                                        | 16 h/ 8 h     | 60 days     | Shoot multiplication                   | Singh et al. 2020       |

|                                                      |        |           |          |                        |                                                                          |          |           |         |                                        |                               |
|------------------------------------------------------|--------|-----------|----------|------------------------|--------------------------------------------------------------------------|----------|-----------|---------|----------------------------------------|-------------------------------|
|                                                      | MS     | 3% suc.   | 0.8% ag  | –                      | 1 mg/L 2,4-D + 1 mg/L NAA + 0.5 mg/L BAP or 1 mg/L 2,4-D + 2.25 mg/L BAP | 25±2 °C  | 16 h/ 8 h | 60 days | Callus induction                       |                               |
|                                                      | MS     | 3% suc.   | 0.8% ag  | –                      | 0.5 mg/L KIN                                                             | 25±2 °C  | 16 h/ 8 h | 60 days | Tuber regeneration                     |                               |
| <i>P. tuberosa</i>                                   | WH     | 2% suc.   | 0.75% ag | –                      | 0.3 mg/L TDZ + 0.5 mg/L NAA                                              | 25±2 °C  | 16 h/ 8 h | –       | Shoot multiplication                   | Gajbhiye et al. 2011          |
|                                                      | WH     | 1% suc.   | 0.75% ag | –                      | 2 mg/L IBA                                                               | 25±2 °C  | 16 h/ 8 h | –       | Root regeneration                      |                               |
| <i>P. tuberosa</i>                                   | WH     | 1.5% suc. | 0.75% ag | 1 mg/L GA <sub>3</sub> | 4 mg/L 2,4-D                                                             | 25±2 °C  | 16 h/ 8 h | –       | Callus induction                       | Raghuvanshi et al. 2013       |
|                                                      | WH     | 1.5% suc. | 0.75% ag | 1 mg/L GA <sub>3</sub> | 1 mg/L TDZ + 0.5 mg/L NAA                                                | 25±2 °C  | 16 h/ 8 h | –       | Shoot proliferation                    |                               |
|                                                      | WH     | 1.5% suc. | 0.75% ag | 1 mg/L GA <sub>3</sub> | 2 mg/L TDZ + 0.5 mg/L NAA                                                | 25±2 °C  | 16 h/ 8 h | –       | Shoot multiplication                   |                               |
|                                                      | WH     | 1.5% suc. | 0.75% ag | 1 mg/L GA <sub>3</sub> | 2 mg/L IBA                                                               | 25±2 °C  | 16 h/ 8 h | –       | Root induction                         |                               |
| <i>P. tuberosa</i>                                   | MS     | 3% suc.   | 0.8% ag  | –                      | 3 mg/L IAA + 0.5 mg/L BAP                                                | 27 °C    | –         | –       | Callus induction                       | Sangavai and Chellapandi 2008 |
|                                                      | MS     | 3% suc.   | 0.8% ag  | –                      | 1.5 mg/L BAP + 0.5 mg/L IAA                                              | 27 °C    | –         | –       | Shoot induction                        |                               |
| <i>P. tuberosa</i>                                   | MS     | –         | –        | –                      | 2 mg/L BAP + 0.5 mg/L NAA                                                | 25±2 °C  | 16 h/ 8 h | –       | Shoot regeneration                     | Khanchana et al. 2019         |
|                                                      | 1/2 MS | –         | –        | –                      | 1 mg/L IBA + 1 mg/L NAA                                                  | 25±2 °C  | 16 h/ 8 h | –       | Root induction                         |                               |
| <i>P. tuberosa</i>                                   | MS     | 3% suc.   | 0.8% ag  | –                      | 4 mg/L BAP + 0.5 mg/L NAA + 0.5 mg/L TDZ                                 | –        | –         | –       | Shoot organogenesis and multiplication | Surendranath et al            |
|                                                      | 1/2 MS | 3% suc.   | 0.8% ag  | –                      | 3 mg/L IBA + 1 mg/L NAA                                                  | –        | –         | –       | Root organogenesis                     |                               |
| <i>P. tuberosa</i>                                   | MS     | 2% suc.   | 0.64% ag | –                      | 4.5 mg/L BAP + 0.05 mg/L NAA                                             | –        | –         | –       | Callus induction                       | Hernández-Mendoza et al. 2021 |
|                                                      | MS     | 2% suc.   | 0.64% ag | –                      | 4.5 mg/L BAP + 0.1 mg/L NAA                                              | –        | –         | –       | Shoot regeneration                     |                               |
|                                                      | MS     | 2% suc.   | 0.64% ag | –                      | 1 mg/L IBAA + 0.1 mg/L BAP                                               | –        | –         | –       | Root induction                         |                               |
| Gladiolus                                            |        |           |          |                        |                                                                          |          |           |         |                                        |                               |
| <i>Gladiolus grandiflorus</i> cv. "White Friendship" | MS     | 3% suc.   | 0.8% ag  | –                      | 4 mg/L BAP                                                               | 25~27 °C | 16 h/ 8 h | –       | Shoot regeneration                     | Memon et al. 2010             |
|                                                      | MS     | 3% suc.   | 0.8% ag  | –                      | 2 mg/L IBA                                                               | 25~27 °C | 16 h/ 8 h | –       | Root regeneration                      |                               |
|                                                      | MS     | 7% suc.   | 0.8% ag  | –                      | 1 mg/L IBA                                                               | 25~27 °C | 16 h/ 8 h | –       | Cormel production                      |                               |
| <i>G. grandiflorus</i> cv. "Pink"                    | MS     | 3 % suc.  | 0.7 % ag | –                      | 2 mg/L BAP + 2 mg/L NAA or 4 mg/L BAP + 1 mg/L NAA                       | 25±1 °C  | 16 h/ 8 h | 14 wks  | Shoot regeneration                     | Torabi et al. 2008            |
|                                                      |        |           |          | –                      | 2 mg/L NAA                                                               | 25±1 °C  | 16 h/ 8 h | 14 wks  | Root organogenesis                     |                               |
|                                                      |        |           |          | –                      | 4 mg/L BAP + 1 mg/L NAA                                                  | 25±1 °C  | 16 h/ 8 h | 14 wks  | Cormel organogenesis                   |                               |
| <i>Gladiolus hybridus</i>                            | MS     | 3% suc.   | 0.75% ag | –                      | 2 mg/L BAP + 0.5 mg/L 2,4-D                                              | 25±2 °C  | –         | –       | Callus induction                       | Tripathi et al. 2017          |
|                                                      |        | 3% suc.   | 0.75% ag | –                      | 2-3 mg/L BA + 0.5 mg/L NAA                                               | 25±2 °C  | –         | –       | Shoot proliferation                    |                               |
|                                                      |        | 1.5% suc. | 0.75% ag | –                      | 0.5 mg/L IBA + 0.5 mg/L KIN                                              | 25±2 °C  | –         | –       | Root proliferation                     |                               |
| <i>G. grandiflorus</i> cv. "White Prosperity"        | MS     | 3% suc.   | 0.8% ag  | –                      | 5 mg/L BA + 0.5 mg/L IAA                                                 | 25±2 °C  | 16 h/ 8 h | –       | Shoot proliferation                    | Deshmukh et al. 2021          |
| <i>Gladiolus</i>                                     | MS     | -         | 0.8% ag  | –                      | 1 mg/L BAP + 0.5 mg/L KIN                                                | 27±2 °C  | 16 h/ 8 h | 27 days | Plantlet regeneration                  | Mateen 2019                   |
|                                                      | MS     | -         | 0.8% ag  | –                      | 1 mg/L BAP + 0.5 mg/L KIN                                                | 27±2 °C  | 16 h/ 8 h | 8 days  | Shoot organogenesis                    |                               |
|                                                      | MS     | -         | 0.8% ag  | –                      | 1 mg/L NAA + 0.25 mg/L KIN                                               | 27±2 °C  | 16 h/ 8 h | 21 days | Shoot multiplication                   |                               |
|                                                      | MS     | -         | 0.8% ag  | –                      | 1 mg/L NAA + 0.5 mg/L IBA                                                | 27±2 °C  | 16 h/ 8 h | 8 days  | Root organogenesis                     |                               |
| <i>G. hybrida</i> cv. "White Prosperity"             | MS     | 3% suc.   | 0.7% ag  | –                      | 2 mg/L 2,4-D                                                             | 25±2 °C  | 16 h/ 8 h | 28 days | Shoot regeneration                     | Devi et al. 2019              |
| <i>G. hybrida</i> cv. "Sylvia"                       | MS     | 3% suc.   | 0.7% ag  | –                      | 2 mg/L 2,4-D                                                             | 25±2 °C  | 16 h/ 8 h | 28 days |                                        |                               |
| <i>G. hybrida</i> cv. "Amsterdam"                    | MS     | 3% suc.   | 0.7% ag  | –                      | 2 mg/L 2,4-D                                                             | 25±2 °C  | 16 h/ 8 h | 28 days |                                        |                               |
| <i>G. hybrida</i> cv. "White Prosperity"             | B5     | 3% suc.   | 0.75% ag | –                      | 1 mg/L BAP                                                               | –        | –         | –       | Shoot organogenesis                    | Kumar et al. 2018             |
|                                                      | MS     | 3% suc.   | 0.75% ag | –                      | 1 mg/L BAP                                                               | –        | –         | –       |                                        |                               |



[illegible]

|                                                            |     |         |         |                                                       |                                                        |         |            |          |                              |                                  |
|------------------------------------------------------------|-----|---------|---------|-------------------------------------------------------|--------------------------------------------------------|---------|------------|----------|------------------------------|----------------------------------|
| <i>Callistemon citrinus</i>                                | WPM | 3% suc. | 0.8% ag | 100 mg/L MI + 1 mg/L thi + 0.5 mg/L pyr + 0.5 mg/L NA | 0.5 mg/L BA + 0.25 mg/L NAA                            | 25 °C   | 16 h/ 8 h  | –        | Shoot proliferation          | Papafotiou and Skylourakis, 2010 |
| <b>Petunias</b>                                            |     |         |         |                                                       |                                                        |         |            |          |                              |                                  |
| <i>Petunia hybrida</i> Vilm. cv. “Bravo”                   | MS  | 3% suc. | –       | MI                                                    | 1.5 mg/L TDZ + 1 mg/L BAP                              | 24±1 °C | 16 h/ 8 h  | –        | Callus induction and         | Farooq et al. 2021               |
|                                                            | MS  | 3% suc. | –       | MI                                                    | 0.5 mg/L IBA + 0.5 mg/L BAP                            | 24±1 °C | 16 h/ 8 h  | –        | Shoot regeneration           |                                  |
| <i>Petunia hybrida</i>                                     | MS  | –       | –       | –                                                     | 0.6 mg/L BAP + 0.5 mg/L IBA                            | –       | –          | –        | Shoot multiplication         | Habas et al. 2019                |
| <b>Periwinkle</b>                                          |     |         |         |                                                       |                                                        |         |            |          |                              |                                  |
| <i>Catharanthus roseus</i> Don                             | MS  | 3% suc. | 0.7% ag | 100 mg/L MI                                           | 3 µM BA + 3 µM KIN + 0.1 µM AgNO3                      | 25±1 °C | 12 h/ 12 h | 12 days  | Shoot formation              | Panigrahi et al. 2018            |
| <i>Catharanthus roseus</i> Don                             | MS  | 3% suc. | 0.7% ag | –                                                     | 1 mg/L IAA + 4 mg/L BA                                 | –       | 16 h/ 8 h  | 4 wks    | Callus induction             | Hoda 2013                        |
|                                                            | MS  | 3% suc. | 0.7% ag | –                                                     | 4 mg/L BA                                              | –       | 16 h/ 8 h  | –        | Shoot formation              |                                  |
|                                                            | MS  | 3% suc. | 0.7% ag | –                                                     | 1 mg/L IAA + 4.0 mg/L BA                               | –       | 16 h/ 8 h  | –        | Root formation               |                                  |
| <b>Hibiscus</b>                                            |     |         |         |                                                       |                                                        |         |            |          |                              |                                  |
| <i>Hibiscus coddii</i> subsp. <i>barnardii</i>             | MS  | 3% suc. | 0.3% gr | –                                                     | 1 mg/L BAP                                             | 24±2 °C | 16 h/ 8 h  | –        | Callus induction             | Plessis et al. 2021              |
| <i>H. syriacus</i>                                         | MS  | 3% suc. | 0.3% gr | –                                                     | 0.01 mg/L TDZ                                          | 25±1 °C | 16 h/ 8 h  | –        | Shoot regeneration           | Seo et al. 2017                  |
|                                                            | MS  | 3% suc. | 0.3% gr | –                                                     | 1 mg/L BAP                                             | 25±1 °C | 16 h/ 8 h  | –        | Callus induction             |                                  |
| <b>Begonia</b>                                             |     |         |         |                                                       |                                                        |         |            |          |                              |                                  |
| <i>Begonia rubrovenia</i> var. <i>meisneri</i> C.B. Clarke | MS  | 3% suc. | 0.8% ag | –                                                     | 0.1 mg/L TDZ (shoot); 0.1 mg/L IAA (root)              | 25±2 °C | 12 h/ 12 h | –        | Plantlet regeneration        | Kumaria et al. 2012              |
| <b>Coleus</b>                                              |     |         |         |                                                       |                                                        |         |            |          |                              |                                  |
| <i>Coleus aromaticus</i> Benth                             | MS  | –       | –       | –                                                     | 1.0 mg/L BAP + 40 mg/L Ch (shoot); 0.5 mg/L NAA (root) | 24±2 °C | 16 h/ 8 h  | –        | Shoot and root organogenesis | Govindaraju and Arulselvi 2018   |
| <b>Hosta</b>                                               |     |         |         |                                                       |                                                        |         |            |          |                              |                                  |
| <i>Hosta sieboldiana</i>                                   | MS  | 3% suc. | 0.2% gg | –                                                     | 0.5~1 mg/L Pic                                         | 25 °C   | 16 h/ 8 h  | 6 wks    | Callus induction             | Saito and Nakano 2002            |
| <i>H. sieboldiana</i>                                      | MS  | 3% suc. | 0.2% gg | 0.5-1 mg/L Pic                                        | 0.1 mg/L NAA + 1 or 5 mg/L TDZ                         | 25 °C   | 16 h/ 8 h  | 2 months | Plantlet regeneration        |                                  |
| <i>H. capitata</i> (Koidz.) Nakai                          | MS  | 3% suc. | 0.7% ag | –                                                     | 2 mg/L TDZ                                             | –       | –          | –        | Shoot multiplication         | Choi et al. 2019                 |
| <i>H. clausa</i> Nakai and <i>H. jonesii</i> M.G.Chung     | MS  | 3% suc. | 0.7% ag | –                                                     | 1 mg/L TDZ                                             | –       | –          | –        | Shoot multiplication         |                                  |
| <i>H. minor</i> (Baker) Nakai                              | MS  | 3% suc. | 0.7% ag | –                                                     | 0.5 mg/L BA                                            | –       | –          | –        | Shoot multiplication         |                                  |
| <i>H. venusta</i> F.Maek.                                  | MS  | 3% suc. | 0.7% ag | –                                                     | 1 mg/L BA; 0.1 mg/L TDZ                                | –       | –          | –        | Shoot multiplication         |                                  |
| <i>H. yingeri</i> S.B.Jones                                | MS  | 3% suc. | 0.7% ag | –                                                     | 0.5 mg/L TDZ                                           | –       | –          | –        | Shoot multiplication         |                                  |
| <i>H. capitata</i>                                         | MS  | 3% suc. | –       | –                                                     | 3 mg/L BA + 0.1 mg/L NAA                               | –       | 16 h/ 8 h  | 6wks     | Shoot regeneration           | Pe et al. 2020                   |
| <i>H. capitata</i>                                         | MS  | 3% suc. | –       | 3 mg/L BA + 0.1 mg/L NAA                              | 20 mg/L NAg                                            | –       | 16 h/ 8 h  | 6wks     | Plant growth                 |                                  |
| <i>H. plantaginea</i> ‘Joseon’                             | MS  | 3% suc. | 0.8% ag | 0.1 mg/L MI                                           | 4 mg/L BA + 0.2 mg/L NAA                               | 23±1 °C | 16 h/ 8 h  | 6wks     | Plantlet regeneration        | Ku et al. 2016                   |

|                                |        |         |         |                                                      |                                  |         |           |            |                       |                       |
|--------------------------------|--------|---------|---------|------------------------------------------------------|----------------------------------|---------|-----------|------------|-----------------------|-----------------------|
| <i>H. plantaginea</i> ‘Joseon’ | MS     | 3% suc. | 0.8% ag | 0.1 mg/L MI                                          | 2 or 4 mg/L KIN + 0.2 mg/L-1 NAA | 23±2 °C | 16 h/ 8 h | 6wks       | Plantlet regeneration |                       |
| <i>H. minor</i> (Baker) Nakai  | MS     | 3% suc. | 0.8% ag | –                                                    | 2.0 µM TDZ + 0.5 µM NAA          | –       | –         | –          | Shoot multiplication  | Song et al. 2020      |
| <i>H. minor</i> (Baker) Nakai  | 1/2 MS | 3% suc. | 0.8% ag | –                                                    | 2 µM IBA                         | –       | –         | –          | Root organogenesis    |                       |
| <b>Bauhinia</b>                |        |         |         |                                                      |                                  |         |           |            |                       |                       |
| <i>Bauhinia racemosa</i> Lam.  | MS     | 3% suc. | 0.8% ag | 50 mg/L AA + 25 mg/L AS + 25 mg/L CA + 25 mg/L L–arg | 3 mg/L BA                        | 26±2 °C | –         | 30–35 days | Shoot induction       | Sharma et al. 2017    |
|                                | MS     | 3% suc. | 0.8% ag |                                                      | 0.75 mg/L BA                     | 26±2 °C | –         | 30–35 days | Shoot multiplication  |                       |
| <b>Morning glory</b>           |        |         |         |                                                      |                                  |         |           |            |                       |                       |
| <i>Ipomoea purpurea</i>        | MS     | 3% suc. | 0.7% ag | –                                                    | 0.25~0.50 mg/L IBA               | 23±1 °C | 16 h/ 8 h | –          | Root organogenesis    | Acemi et al. 2018     |
| <i>Merremia quinquefolia</i>   | MS     | 3% suc. | 0.8% ag | –                                                    | 4.0 mg/L BAP                     | 25±2 °C | 16 h/ 8 h | 45 days    | Shoot multiplication  | Kher et al. 2015      |
| <i>M. quinquefolia</i>         | 1/2 MS | 3% suc. | –       | –                                                    | 2 mg/L IBA                       | 25±2 °C | 16 h/ 8 h | 45 days    | Shoot multiplication  |                       |
| <b>Common laburnum</b>         |        |         |         |                                                      |                                  |         |           |            |                       |                       |
| <i>Laburnum anagyroides</i>    | MS     | 2% suc. | –       | –                                                    | 2.22 µM BAP                      | 24±2 °C | 14h /10h  | –          | Shoot organogenesis   | Timofeeva et al. 2014 |
| <i>L. anagyroides</i>          | 1/2 MS | 1% suc. | –       | –                                                    | 2.22 µM BAP                      | 24±2 °C | 14h /10h  | –          | Shoot multiplication  |                       |

|                                 |        |             |         |   |                                                                         |         |           |       |                                               |                                |
|---------------------------------|--------|-------------|---------|---|-------------------------------------------------------------------------|---------|-----------|-------|-----------------------------------------------|--------------------------------|
| <b>Lanterns</b>                 |        |             |         |   |                                                                         |         |           |       |                                               |                                |
| <i>Ceropegia attenuata</i> Hook | MS     | 3% suc.     | 0.2% gr | – | 13.31 µM BAP                                                            | 25±2 °C | 16 h/ 8 h | 4 wks | Shoot induction and multiplication            | Chavan et al. 2011             |
| <i>C. bulbosa</i> var. bulbosa  | MS     | 3% suc.     | 0.8% ag | – | 8.88 µM BAP + 0.54 µM NAA                                               | 25±2 °C | 16 h/ 8 h | 4 wks | Shoot induction and multiplication            | Dhir and Shekhawat 2014        |
| <i>C. bulbosa</i> var. lushii   | MS     | 3% suc.     | 0.8% ag | – | 8.88 µM BAP + 0.27 µM NAA                                               | 25±2 °C | 16 h/ 8 h | 4 wks |                                               |                                |
| <i>C. bulbosa</i> var. bulbosa  | MS     | 3% suc.     | 0.8% ag | – | 8.88 µM BA                                                              | 25±2 °C | 16 h/ 8 h | 4 wks | Shoot multiplication                          | Dhir and Shekhawat 2013        |
| <i>C. elegans</i>               | MS     | 3% suc.     | 0.8% ag | – | 23.2 µM KIN + 5.71 µM IAA                                               | 25±2 °C | 16 h/ 8 h | 4 wks | Shoot multiplication                          | Krishnareddy and Pullaiah 2012 |
| <i>C. ensifolia</i>             | MS     | 3% suc.     | 0.8% ag | – | 3 mg/L BAP + 0.2 mg/L TDZ                                               | 25±2 °C | 16 h/ 8 h | 6 wks | Shoot multiplication                          | Reddy et al. 2015              |
|                                 | MS     | 3% suc.     | 0.8% ag | – | 0.1 mg/L NAA + 0.05 mg/L BAP                                            | 25±2 °C | 16 h/ 8 h | 6 wks | Root organogenesis                            |                                |
| <i>C. evansii</i>               | MS     | 3% suc.     | 0.8% ag | – | 4 mg/L BAP + 0.3 mg/L IAA                                               | 25±1 °C | 16 h/ 8 h | –     | Shoot regeneration and multiplication         | Chavan et al. 2015             |
|                                 | MS     | 3% suc.     | 0.8% ag | – | 2 mg/L NAA + 1.5 mg/L IBA                                               | 25±1 °C | 16 h/ 8 h | –     | Root organogenesis                            |                                |
| <i>C. noorjahaniae</i>          | MS     | 3% suc.     | 0.2% cg | – | 2 mg/L BAP                                                              | 25±1 °C | 16 h/ 8 h | 4 wks | Shoot induction and multiplication            | Chavan et al. 2014             |
|                                 | 1/2 MS | 3% suc.     | 0.2% cg | – | 1 mg/L IAA                                                              | 25±1 °C | 16 h/ 8 h | 4 wks | Root organogenesis                            |                                |
| <i>C. panchganiensis</i>        | MS     | 3% suc.     | 0.2% cg | – | 13.31 µM BAP + 2.69 µM NAA                                              | 25±1 °C | 16 h/ 8 h |       | Shoot induction and multiplication            | Chavan et al. 2013             |
|                                 | MS     | 3% suc.     | 0.2% cg | – | 9.05 µM 2,4-D                                                           | 25±1 °C | 16 h/ 8 h | –     | Callus induction                              |                                |
|                                 | 1/2 MS | 175 mM suc. | –       | – | 4.44 µM BAP (flower bud); 17.74 µM BAP (microtuber); 7.36 µM IBA (root) | 25±1 °C | 16 h/ 8 h | –     | Flower bud, microtuber formation, and rooting |                                |



|                                                                            |     |           |         |                                         |                                                                                    |         |            |         |                                                 |                         |
|----------------------------------------------------------------------------|-----|-----------|---------|-----------------------------------------|------------------------------------------------------------------------------------|---------|------------|---------|-------------------------------------------------|-------------------------|
| <b>Dracaena/ Snake plant</b>                                               |     |           |         |                                         |                                                                                    |         |            |         |                                                 |                         |
| <i>Dracaena sanderiana</i><br>Sander ex Mast                               | MS  | –         | –       | –                                       | 6.78 µM 2,4-D (callus); 7.84 µM BAP (shoot); 7.38 µM IBA (root)                    | 25±2 °C | 16 h/ 8 h  | –       | Callus, shoot and root induction                | Aslam et al. 2013       |
| <b>Hyacinths</b>                                                           |     |           |         |                                         |                                                                                    |         |            |         |                                                 |                         |
| <i>Lachenalia viridiflora</i><br>(Turquoise hyacinth)                      | MS  | 3% suc.   | –       | 0.1 g/L MI                              | 2.5 µM Pic + 1 µM TDZ                                                              | 25±2 °C | 16 h/ 8 h  | 6 wks   | Embryogenic callus induction                    | Kumar et al. 2016       |
|                                                                            | MS  | 3% suc.   | –       | 0.1 g/L MI                              | 5 µM phloroglucinol                                                                | 25±2 °C | 16 h/ 8 h  | 6 wks   | Plantlet regeneration                           |                         |
| <i>Hyacinthus orientalis</i> subsp. <i>chionophyllus</i><br>Wendelbo       | MS  | 3% suc.   | 0.7% ag | 2 mg/L BA + 0.5 mg/L IAA                | 1 mg/L JA + 0.25 mg/L 2iP                                                          | 24±2 °C | 16 h/ 8 h  | 12 wks  | Bulb formation                                  | Doğan et al. 2020       |
|                                                                            | MS  | 3% suc.   | 0.7% ag | 2 mg/L BA + 0.5 mg/L IAA                | 2 mg/L JA + 1 mg/L IAA                                                             | 24±2 °C | 16 h/ 8 h  | 12 wks  | Bulb formation                                  |                         |
| <b>Dumb cane</b>                                                           |     |           |         |                                         |                                                                                    |         |            |         |                                                 |                         |
| <i>Dieffenbachia</i> cv. "Camouflage", "Camille", "Octopus", "Star Bright" | MS  | –         | 0.6% ag | –                                       | 5 µM TDZ + 1 µM 2,4-D                                                              | 22±3 °C | 16 h/ 8 h  | 8 wks   | Callus                                          | Shen et al. 2008        |
|                                                                            | MS  | –         | 0.6% ag | –                                       | 80 µM 2iP + 2 µM IAA                                                               | 22±3 °C | 16 h/ 8 h  | 8 wks   | Shoot organogenesis                             |                         |
| <b>Ixora</b>                                                               |     |           |         |                                         |                                                                                    |         |            |         |                                                 |                         |
| <i>Ixora coccinea</i>                                                      | MS  | –         | –       | 0, 0.5, 2 and 4 mg/L Kinetin and Zeatin | 0, 0.5, 2 and 4 mg/L of different type of cytokinins BAP or 0.5 mg/L IBA           | 25±2 °C | –          | 8 wks   | Shoot multiplication                            | Onsa et al. 2018        |
| <b>Rhododendron</b>                                                        |     |           |         |                                         |                                                                                    |         |            |         |                                                 |                         |
| <i>Rhododendron fortunei</i>                                               | WPM | 1.5% suc. | 0.7% ag | 4 mg/L 6P or ZT                         | 1.0 mg/L NAA                                                                       | 25 °C   | 116 h/ 8 h | 90 days | Axillary shoot induction                        | Wei et al. 2018         |
| <b>Lantena</b>                                                             |     |           |         |                                         |                                                                                    |         |            |         |                                                 |                         |
| <i>Lantana camara</i> L                                                    | MS  | –         | –       | –                                       | 12.0e20 mM TDZ (shoot), 5 or 10 mM NAA (root), 21.5 mM NAA and 22.5 mM BA (callus) | 25±2 °C | 16 h/ 8 h  | 4 wks   | Shoot multiplication, callus and root induction | Veraplakorn et al. 2018 |
| <b>Oleander</b>                                                            |     |           |         |                                         |                                                                                    |         |            |         |                                                 |                         |

|                                                    |     |         |         |             |                         |         |           |            |                        |                    |
|----------------------------------------------------|-----|---------|---------|-------------|-------------------------|---------|-----------|------------|------------------------|--------------------|
| <i>Nerium oleander</i> L.                          | MS  | 3% suc. | 0.7% ag | –           | 8.8 µM TDZ or 4.4 µM BA | 25±2 °C | 16 h/ 8 h | 45 days    | Shoot proliferation    | Vila et al. 2010   |
| Jasmine                                            |     |         |         |             |                         |         |           |            |                        |                    |
| <i>Jasminum grandiflorum</i> L.                    | MS  | –       | –       | –           | 1 mg/L BAP + 45 mg/L cw | 25±2 °C | 16 h/ 8 h | 4 wks      | Shoot proliferation    | Rahman et al. 2018 |
|                                                    | MS  | –       | –       | –           | 1.5 mg/L IBA            | 25±2 °C | 16 h/ 8 h | 14–23 days | Rooting                |                    |
| Passion Flower                                     |     |         |         |             |                         |         |           |            |                        |                    |
| <i>Passiflora caerulea</i> L                       | MS  | –       | –       | –           | 2 mg/L BAP + 1 mg/L KIN | 26±1 °C | 16 h/ 8 h | 54 days    | Direct shoot induction | Rathod et al. 2014 |
| Honey Suckle                                       |     |         |         |             |                         |         |           |            |                        |                    |
| <i>Lonicera japonica</i><br>“Japanese honeysuckle” | DKW | 3% suc. | 0.7% ag | 100 mg/L MI | 5 µM BA                 | 25 °C   | 16 h/ 8 h | 12 wks     | Axillary micro shoots  | Osburn et al. 2009 |
| <i>L. japonica</i> “Amur honeysuckle”              | MS  | 3% suc. | 0.7% ag | 100 mg/L MI | 2.5 µM BA ± 1.25 µM IBA | 25 °C   | 16 h/ 8 h | 4 wks      | Shoot proliferation    |                    |



|                                                    |    |            |          |                           |                                                    |         |           |         |                                         |                        |
|----------------------------------------------------|----|------------|----------|---------------------------|----------------------------------------------------|---------|-----------|---------|-----------------------------------------|------------------------|
| <i>Epipremnum aureum</i> "Linden" and "Andre"      | MS | 2% suc.    | 0.6% ag. | 1, 5 or 10 µM TDZ         | 0.5 or 1.0 µM NAA                                  | 25 °C   | 16 h/ 8 h | 45 days | Shoot regeneration                      | Qu et al. 2002         |
| <i>Epipremnum aureum</i> "Álbino"                  | MS | 0.25% suc. | 5 g/L ag | 2 mg/L CPPU, 10 mg/L AA   | 0.2 mg/L NAA                                       | 23 °C   | 24 h/ 0 h | 37 days | Chorophyll development                  | Hung et al. 2021       |
| <b>Spider plant</b>                                |    |            |          |                           |                                                    |         |           |         |                                         |                        |
| <i>Chlorophytum borivillianum</i> Sant. Et Fernand | MS | –          | –        | 20 mg/L AdSO <sub>4</sub> | 2 mg/L BAP + 1 mg/L NAA                            | –       | –         | 45 days | shoot induction and shoot proliferation | Khatri et al. 2019     |
| <b>Common rue</b>                                  |    |            |          |                           |                                                    |         |           |         |                                         |                        |
| <i>Ruta graveolens</i>                             | MS | 3% suc.    | 1% ag    | –                         | 10 µM BA + 2.5 µM NAA                              | 25±2 °C | 16 h/ 8 h | 8 wks   | Shoot regeneration                      | Faisal et al 2018      |
| <i>R. graveolens</i>                               | MS | 3% suc.    | 0.8% ag  | –                         | 11 µM BA + 2.5 µM NAA                              | 24±3 °C | 16 h/ 8 h | 8 wks   | Shoot regeneration                      | Faisal et al 2005      |
| <b>Mezereum</b>                                    |    |            |          |                           |                                                    |         |           |         |                                         |                        |
| <i>Daphne mezereum</i> "Alba"                      | MS | Suc.       | ag       | MI                        | 1 mg/L BA + 0.1 mg/L NAA; 0.3 mg/L GA3 + 1 mg/L mT | –       | –         | 6 wks   | Shoot organogenesis                     | Nowakowska et al. 2019 |

Table S2. Effective elicitors for the in vitro culture in ornamentals.

| Plant species                              | Media            | Carbon source | Solidifying agent | Media supplements                                                                                                                                                                                                                                                                                                                                                                   | Effective concentration and combinations                                      | Temperature (°C) | Light /dark cycle | Culture period | Target of regeneration        | References                 |
|--------------------------------------------|------------------|---------------|-------------------|-------------------------------------------------------------------------------------------------------------------------------------------------------------------------------------------------------------------------------------------------------------------------------------------------------------------------------------------------------------------------------------|-------------------------------------------------------------------------------|------------------|-------------------|----------------|-------------------------------|----------------------------|
| <b>Cymbidium</b>                           |                  |               |                   |                                                                                                                                                                                                                                                                                                                                                                                     |                                                                               |                  |                   |                |                               |                            |
| <i>Cymbidium insigne</i>                   | mMS <sup>1</sup> | 2% suc.       | 0.22% pg          | –                                                                                                                                                                                                                                                                                                                                                                                   | 1 mg/L 5-ALA                                                                  |                  | 16 h/ 8 h         | 8 wks          | PLB regeneration              | Nahar and Shimasaki 2014   |
| <i>C. insigne</i>                          | mMS <sup>1</sup> | 2% suc.       | 0.2% pg           | –                                                                                                                                                                                                                                                                                                                                                                                   | 0.1 mg/L MeJA or 0.1 mg/L Lysozyme                                            | 25 °C            | 16 h/ 8 h         | 6 wks          | PLB regeneration              | Nahar et al. 2015          |
| <i>C. finlaysonianum</i>                   | mMS <sup>1</sup> | 2% suc.       | 0.22 % pg         | –                                                                                                                                                                                                                                                                                                                                                                                   | 0.01 mg/L 5-ALA                                                               |                  | 16 h/ 8 h         |                |                               |                            |
| <i>Cymbidium</i> Twilight Moon ‘Day Light’ | TC               | 2% suc.       |                   | 0.1 mg/L NAA + 0.1 mg/L KIN + 2 g/L Tt                                                                                                                                                                                                                                                                                                                                              | 1-2 mg/L AgNO <sub>3</sub>                                                    |                  |                   | 60 days        | PLB                           | da Silva 2013              |
| <b>Dendrobium</b>                          |                  |               |                   |                                                                                                                                                                                                                                                                                                                                                                                     |                                                                               |                  |                   |                |                               |                            |
| <i>Dendrobium</i> sp                       | VW               | 2% suc.       | –                 | 50 ml/L cw, 0.525 g/L KNO <sub>3</sub> , 0.25 g/L KH <sub>2</sub> PO <sub>4</sub> , 0.5 g/L (NH <sub>4</sub> ) <sub>2</sub> S0 <sub>4</sub> , 0.007 g/L MnSO <sub>4</sub> .4H <sub>2</sub> O, 0.025 g/L MgS0 <sub>4</sub> .7H <sub>2</sub> 0, 0.028 g/L FeS0 <sub>4</sub> .7H <sub>2</sub> 0 and 0.037 g/L Na <sub>2</sub> - EDTA, 10 mg/L auxin, 5 mg/L cytokines and 2 mg/L 2,4-D | 15 ppm of Ch                                                                  | –                | –                 | 3, 6 and 9 wks | PLB organogenesis             | Restanto et al 2016        |
| <i>Dendrobium</i> sp cv. ‘Eiskul’          | mVW              | 2% suc.       | 0.8% ag           | 15% cw                                                                                                                                                                                                                                                                                                                                                                              | 10 or 20 mg/L of 80% O-Ch (PLBs); 10 mg/L of 80% O-Ch or 80% P-Ch (plantlets) | 25±2 °C          | 16 h/ 8 h         | 3 months       | PLB-shoot induction           | Pornpienpakdee et al. 2010 |
| <i>D. phalaenopsis</i>                     | VW               | 2% suc.       | 1.2% ag           | 15% cw + 0.525 g/L KNO <sub>3</sub> + 0.25 g/L KH <sub>2</sub> PO <sub>4</sub> + 0.5 g/L (NH <sub>4</sub> ) <sub>2</sub> SO <sub>4</sub> + 0.007 g/L MnSO <sub>4</sub> .4H <sub>2</sub> O + 0.025g/L MgSO <sub>4</sub> .7H <sub>2</sub> O + 0.028 g/L FeSO <sub>4</sub> .7H <sub>2</sub> O + 0.037 g/L Na <sub>2</sub> -EDTA                                                        | 15 ppm (PLB) or 20 ppm (plantlet) of 1 kDa O-Ch-shrimp                        | 27 °C            | 16 h/ 8 h         | 12 wks         | PLB and plantlet regeneration | Nge et al. 2006            |
| <i>D. bigibbum</i> var. <i>compactum</i>   | mVW              | 2% suc.       | 0.8% ag           | 15% cw                                                                                                                                                                                                                                                                                                                                                                              | 10 mg/L O-Ch/P-Ch (70%, 80%, and 90%, except 90% O-Ch)                        | 25 °C            | 16 h/ 8 h         | 12 wks         | PLB organogenesis             | Kananont et al. 2010       |

|                                                    |                  |         |          |                                        |                                                                                   |         |            |              |                            |                           |
|----------------------------------------------------|------------------|---------|----------|----------------------------------------|-----------------------------------------------------------------------------------|---------|------------|--------------|----------------------------|---------------------------|
| <i>D. formosum</i>                                 | mVW              | 2% suc. | 0.8% ag  | 15% cw                                 | 10 or 20 mg/L of 70% P-Ch                                                         | 25 °C   | 16 h/ 8 h  | 12 wks       |                            |                           |
| <i>D. thyrsiflorum</i>                             | 1/2 MS           | –       | –        | 2 mg/L IBA + 0.6 mg/L NAA              | 0.5 mg/L PG                                                                       | 25±1 °C | 12 h/ 12 h | 5 wks        | Rooting                    | Bhattacharyya et al. 2015 |
| <b>Phalaenopsis</b>                                |                  |         |          |                                        |                                                                                   |         |            |              |                            |                           |
| <i>Phalaenopsis</i> cv. ‘Fmk02010’                 | mMS <sup>1</sup> | 2% suc. | 0.22% pg | –                                      | 0.01 mg/L CCC                                                                     | 25±2 °C | 16 h/ 8 h  | 42 days      | PLB regeneration           | Mehraj et al. 2019        |
| <i>Phalaenopsis</i> cv. ‘Fmk02010’                 | mMS <sup>1</sup> | 2% suc. | 0.2% pg  | –                                      | 0.1 mg/L HA9 + HA12                                                               | 25±2 °C | 16 h/ 8 h  | 42 days      | PLBs proliferation         | Mehraj and Shimasaki 2017 |
| <i>Phalaenopsis</i> cv. ‘Fmk02010’                 | mMS <sup>1</sup> | 2% suc. | 0.2% pg  | –                                      | 0.1 mg/L HA9; 0.1 mg/L HA12                                                       | 25±2 °C | 16 h/ 8 h  | 42 days      | PLBs proliferation         | Sultana et al. 2015a      |
| <i>Phalaenopsis</i> cv. ‘Fmk02010’                 | mMS <sup>1</sup> | 2% suc. | 0.2% pg  | –                                      | 0.1 mg/L NAG; 0.1 mg/L 5-ALA                                                      | 25±2 °C | 16 h/ 8 h  | 6 wks        | PLBs proliferation         | Sultana et al. 2015b      |
| <b>Cattleya</b>                                    |                  |         |          |                                        |                                                                                   |         |            |              |                            |                           |
| <i>Cattleya loddigesii</i>                         | KC               |         | 0.5% ag  | –                                      | 5 mL/L K <sub>2</sub> SiO <sub>3</sub> + 20 mg/L Na <sub>2</sub> SiO <sub>3</sub> | 25±1 °C | 16 h/ 8 h  | 120 days     | Rooting                    | Soares et al. 2011        |
| <b>Rose</b>                                        |                  |         |          |                                        |                                                                                   |         |            |              |                            |                           |
| <i>Rosa</i> x <i>hybrida</i> cv. Sena              | 1/2 MS           | 3% suc. |          | 0.1 g/L MI + 0.5 mg/L BA               | 2 mg/L AgNO <sub>3</sub>                                                          |         |            | 20 , 60 days | Flower induction           | Matos et al. 2020         |
| <i>Rosa</i> sp cv. Red Eden (climbing rose)        | 1/2 MS           | 3% suc. | 0.8% ag  | –                                      | 30 µM AgNO <sub>3</sub>                                                           | 26±2 °C | –          |              | Flower and root induction  | Quynh and Pha 2020        |
| <b>Anthurium</b>                                   |                  |         |          |                                        |                                                                                   |         |            |              |                            |                           |
| <i>Anthurium andraeanum</i> cv. Alabama and Dakota | 1/2 MS           | 3% suc. |          | 0.1 g/L MI + 0.5 mg/L KIN + 1.5 g/L ac | 1 mg/L AgNO <sub>3</sub>                                                          |         |            | 60 days      | Shoot multiplication       | Cardoso 2019              |
|                                                    | 1/2 MS           | 3% suc. |          | 0.1 g/L MI + 0.1 mg/L IBA + 1.5 g/L ac | 1-2 mg/L AgNO <sub>3</sub>                                                        |         |            | 60 days      | Rooting                    |                           |
| <b>Morning glory</b>                               |                  |         |          |                                        |                                                                                   |         |            |              |                            |                           |
| <i>Ipomoea purpurea</i>                            | MS               | 3% suc. |          |                                        | 5 mg/L Ch (mixture O-Ch-DP 2-15)                                                  |         |            | –            | Shoot induction and growth | Acemi et al. 2018         |
| <b>Periwinkle</b>                                  |                  |         |          |                                        |                                                                                   |         |            |              |                            |                           |

|                                                                    |        |         |         |             |                                               |       |           |        |                                            |                          |
|--------------------------------------------------------------------|--------|---------|---------|-------------|-----------------------------------------------|-------|-----------|--------|--------------------------------------------|--------------------------|
| <i>Catharanthus roseus</i>                                         | MS     | 3% suc. |         | 100 mg/L MI | 3 µM BA + 3 µM KIN + 0.1 µM AgNO <sub>3</sub> |       |           | –      | Plantlet regeneration and flower induction | Panigrahi et al. 2018    |
| <b>Tulip</b>                                                       |        |         |         |             |                                               |       |           |        |                                            |                          |
| <i>Tulipa gesneriana</i> cv. New Beet                              | 1/2 MS | 7% suc. | 0.1% ac | –           | 100 µM Pu + 100 µM Spe + 5 mL of 0.1% MeJA    | 16 °C | 16 h/ 8 h | 13 wks | Bulb formation                             | Podwyszyńska et al. 2015 |
| <i>T. gesneriana</i> cv. New Beet                                  | 1/2 MS | 7% suc. | 0.1% ac | –           | 50 µM Pu + 5 mL of 0.1% MeJA                  | 16 °C | 16 h/ 8 h | 13 wks | Bulb formation                             |                          |
| <i>T. gesneriana</i> cv. Fringed Black                             | 1/2 MS | 7% suc. | 0.1% ac | –           | 100 µM Pu + 5 mL of 0.1% MeJA                 | 16 °C | 16 h/ 8 h | 13 wks | Bulb formation                             |                          |
| <i>T. gesneriana</i> cv. P14 (late flowering, Lily-flowered Group) | 1/2 MS | 7% suc. | 0.1% ac | –           | 500 µM Orn + 5 mL of 0.1% MeJA                | 16 °C | 16 h/ 8 h | 13 wks | Bulb formation                             |                          |

|                                                                          |        |         |         |                         |                                                                    |         |           |        |                |                   |
|--------------------------------------------------------------------------|--------|---------|---------|-------------------------|--------------------------------------------------------------------|---------|-----------|--------|----------------|-------------------|
| <i>T. gesneriana</i> cv. P20<br>(meadseason flowering,<br>Fringed Group) | 1/2 MS | 7% suc. | 0.1% ac | –                       | 100 µM Pu + 5 mL of 0.1% MeJA or 100 µM<br>Spe + 5 mL of 0.1% MeJA | 16 °C   | 16 h/ 8 h | 13 wks | Bulb formation |                   |
| Hyacinths                                                                |        |         |         |                         |                                                                    |         |           |        |                |                   |
| <i>Hyacinthus orientalis</i> subsp.<br><i>chionophyllus</i> Wendelbo     | MS     | 3% suc. | 0.7% ag | 2 mg/L BA+ 0.5 mg/L IAA | 1 mg/L JA + 0.25 mg/L 2iP                                          | 24±2 °C | 16 h/ 8 h | 12 wks | bulb formation | Doğan et al. 2020 |
|                                                                          | MS     | 3% suc. | 0.7% ag | 2 mg/L BA+ 0.5 mg/L IAA | 2 mg/L JA + 1 mg/L IAA                                             | 24±2 °C | 16 h/ 8 h | 12 wks | bulb formation |                   |

Table S3. Effective organic additives for the in vitro culture in ornamentals.

| Plant species                              | Media  | Carbon source | Solidifying agent | Media supplements                                        | Effective factors      | Temperature (°C) | Light /dark cycle                  | Culture period  | Target of regeneration                         | Ref                  |
|--------------------------------------------|--------|---------------|-------------------|----------------------------------------------------------|------------------------|------------------|------------------------------------|-----------------|------------------------------------------------|----------------------|
| <b>Phalaenopsis orchid</b>                 |        |               |                   |                                                          |                        |                  |                                    |                 |                                                |                      |
| <i>Phalaenopsis</i> Hybrid 'Pink'          | MS     | 2% suc.       | –                 | –                                                        | 10% carrot juice       | –                | 15 h/ 7 h                          | 4 months        | Plantlet regeneration                          | Zahara et al. 2017   |
|                                            | VW     | 2% suc.       | –                 | –                                                        | 20% carrot juice       | –                | 15 h/ 7 h                          | 4 months        | Plantlet regeneration                          |                      |
| <i>P. amabilis</i> 'Blume'                 | NP     | –             | –                 | –                                                        | 15% tomato extract     | 25±1 °C          | 0 h/ 24 h (1st 14 days); 16 h/ 8 h | 12 wks          | somatic embryogenesis and plantlet generations | Mose et al. 2020     |
| <i>P. amabilis</i> BL. cv. 'Golden Horizon | 1/2 MS | 2% suc.       | 0.22% gr          | 10% cw + 2 g/L peptone + 1 g/L ac + 150 mg/L L-glutamone | 2.5 g/L banana powder  | 24±1 °C          | 16 h/ 8 h                          | 4, 6, and 8 wks | Rooting                                        | Sinha and Jahan 2011 |
| <i>Bulbophyllum auricomum</i> Lindl.       | MS     | 3% suc.       | 0.8% ag           | –                                                        | 15% coconut water (cw) | 25±2 °C          | 16 h/ 8 h                          | 1 and 2 months  | Callus induction and PLB proliferation         | Aung et al. 2022     |
| <i>Paphiopedilum rothschildianum</i>       | 1/2 MS | 3% suc.       | 3% gr             | –                                                        | 60 g/L BH              | 25±2 °C          | 0 h/ 24 h                          | 8 wks           | PLB proliferation                              | Ng et al. 2012       |
| <i>P. rothschildianum</i>                  | 1/2 MS | 3% suc.       | 3% gr             | –                                                        | 30% cw                 | 25±3 °C          | 1 h/ 24 h                          | 9 wks           | PLB proliferation                              |                      |
| <b>Dendrobium orchid</b>                   |        |               |                   |                                                          |                        |                  |                                    |                 |                                                |                      |
| <i>Dendrobium macrostachyum</i>            | MS     | 3% suc.       | 0.8% ag           | –                                                        | 15% cw                 | 25±2 °C          | –                                  | 10 wks          | Shoot regeneration                             | Pyati et al. 2002    |
| <i>D. officinale</i>                       | MS     | 3% suc.       | 0.55% cn          | 2 mg/L BA + 0.1 mg/L NAA                                 | 100 g/L potato extract | 26±2 °C          | 12 h/ 12 h                         | 6 days          | Shoot multiplication                           | Chen et al. 2014     |
| <i>D. densiflorum</i> Lindl.               | MS     | 3% suc.       | 0.8% ag           | 0.01 g/L MI                                              | 15% cw                 | 25±2 °C          | 16 h/ 8 h                          | –               | PLB proliferation and shoot development        | Pant et al. 2022     |

Table S4. Effective light emitting diodes (LEDs) for the in vitro culture in ornamentals.

| Plant spesces                            | Effective LEDs                                                 | Media            | Carbon source  | Solidifying agent | Media supplements                              | Temperature (°C) | Light /dark cycle | Clture period       | Organogenesis/ regeneration    | Ref                          |
|------------------------------------------|----------------------------------------------------------------|------------------|----------------|-------------------|------------------------------------------------|------------------|-------------------|---------------------|--------------------------------|------------------------------|
| Cymbidium orchid                         |                                                                |                  |                |                   |                                                |                  |                   |                     |                                |                              |
| Cymbidium "Twilight Moon “Day Light”     | 100% red                                                       | NN               | 2% suc.        | 0.8% bag          | 0.1 mg/L NAA + 0.01 mg/L TDZ                   | –                | 16 h/ 8 h         | 1 month             | Callus proliferation           | Le and Tanaka 2004           |
|                                          | 25% red +75% blue                                              | NN               | 2% suc.        | 0.8% bag          | 0.1 mg/L NAA + 0.01 mg/L TDZ                   | –                | 16 h/ 8 h         | 1 month             | PLBs formation                 |                              |
| Cymbidium “Golden Bird”                  | Red light (1:0)                                                | VW               | 2% suc.        | –                 | 2 g/L tryptone + 1 ml/L NN microelements       | 25±1 °C          | 16 h/ 8 h         | –                   | Plantlet regeneration          | Tanaka et al. 1998           |
| Cymbidium Waltz ‘Idol’                   | Red + green                                                    | mMS <sup>1</sup> | 2% suc.        | 0.2% pg           | –                                              | 25±2 °C          | 16 h/ 8 h         | 6 wks               | PLB regeneration               | Kaewjampa and Shimasaki 2012 |
| Cymbidium (eight hybrids)                | Different ratios (1:0; 1.5:1; 1:1; 1:1.5; 0:1) of red and blue | TC1              | 2% suc.        | 0.8% bag          | 0.1 mg/L NAA + 0.1 mg/L KIN + 2 g/L tryptone   | 25±1 °C          | 16 h/ 8 h         | –                   | PLB regeneration               | da Silva 2014b               |
| Phalaenopsis orchid                      |                                                                |                  |                |                   |                                                |                  |                   |                     |                                |                              |
| Phalaenopsis cv. ‘Fmk02010’              | Red → white                                                    | mMS <sup>1</sup> | 2% suc.        | 0.22% pg          | –                                              | 25±2 °C          | 16 h/ 8 h         | 42 days             | PLB regeneration               | Mehraj et al. 2019           |
|                                          | Blue → white                                                   | mMS <sup>1</sup> | 2% tre.        | 0.22% pg          | –                                              | 25±2 °C          | 16 h/ 8 h         | 42 days             | PLB regeneration               |                              |
|                                          | Red → green → white                                            | mMS <sup>1</sup> | 2% mal.        | 0.22% pg          | –                                              | 25±2 °C          | 16 h/ 8 h         | 42 days             | PLB regeneration               |                              |
| Phalaenopsis Hybrid                      | 80% red + 20% blue                                             | VW               | 1 % suc.       | –                 | –                                              | –                | –                 | 4 months            | PLB organogenesis              | Wongnok et al. 2008          |
|                                          | 90% red + 10% blue                                             |                  |                |                   | –                                              | –                | –                 | –                   | Shoot regeneration             |                              |
| Phalaenopsis                             | White or blue + red                                            | MS               | –              | 0.25% pg          | PGRs supplemented (not specified)              | 24±2 °C          | 16 h/ 8 h         | 60 days             | Plantlet regeneration          | Bello-Bello et al. 2017      |
| Dendrobium orchid                        |                                                                |                  |                |                   |                                                |                  |                   |                     |                                |                              |
| Dendrobium officinale                    | Different ratios (1:0; 0:1; 1:1; 2:1; 1:2) of red and blue     | 1/2 MS           | 3% suc.        | 0.7% ag           | 0.5 g/L NAA, 0.2 g/L 6-BA,                     | 25±2 °C          | 16 h/ 8 h         | 30, 60, and 90 days | PLB regeneration               | Lin et al. 2011              |
| D. sonia                                 | Yellow                                                         | MS               | 3% suc.        | 0.6% ag           | 11.1 μM BAP + 11.42 μM IAA                     | 22±2 °C          | 16 h/ 8 h         | 4 wks               | Shoot and PLB regeneration     | Billore et al. 2017          |
| D. sonia                                 | Yellow                                                         | MS               | 3% suc.        | 0.6% ag           | 2.5 mg/L BAP + 2 mg/L IAA                      | 22~25 °C         | 16 h/ 8 h         | –                   | Plantlet regeneration          | Billore et al. 2019          |
| D. kingianum                             | Blue                                                           | mMS <sup>1</sup> | 2% suc.        | 0.22% pg          | –                                              | 25±1 °C          | 16 h/ 8 h         | 4 wks               | PLB regeneration               | Habiba et al. 2014           |
| D. okinawense                            | Red                                                            | mMS <sup>1</sup> | 2% suc.        | 0.22% pg          | –                                              | 25±1 °C          | 16 h/ 8 h         | 42 days             | PLB proliferation              | Mehbub et al. 2022           |
| Cattleya orchid                          |                                                                |                  |                |                   |                                                |                  |                   |                     |                                |                              |
| Cattleya Lindl. hybrid Red, NAA al. 2007 | blue MS 3% suc. 0.8% bag 2                                     | mg/L             | AS + 5         | mg/L BA           | + 0.2 mg/L ZT + 1 mg/L 23±1 °C 16 h/ 8 h 3     | months           | Plantlet          |                     | regeneration Cybularz-Urban et |                              |
| Oncidium orchid                          |                                                                |                  |                |                   |                                                |                  |                   |                     |                                |                              |
| Oncidium “Gower Ramsey”                  | Red                                                            | MS               | 3% suc.        | 0.6% ag           | 0.1 g/L BA + 0.5 mg/L NAA                      | 25±2 °C          | 16 h/ 8 h         | 30 days             | PLB regeneration               | Mengxi et al. 2011           |
| Orchids in other genus                   |                                                                |                  |                |                   |                                                |                  |                   |                     |                                |                              |
| Paphiopedilum delenatii                  | Blue                                                           | SH               | 3% suc.        | 0.9% ag           | 1 mg/L TDZ + 0.3 mg/L NAA                      | 25±3 °C          | 16 h/ 8 h         | 4 months            | Shoot regeneration             | Luan et al. 2015             |
| Bletilla ochracea Schltr.                | Green, oranage                                                 | NDM              | 2% suc.        | 0.2% pg           | –                                              | 25±2 °C          | 16 h/ 8 h         | 3 wks               | Seed germination               | Godo et al. 2011             |
| B. ochracea Schltr.                      | Red, oranage                                                   | NDM              | 2% suc.        | 0.2% pg           | –                                              | 25±2 °C          | 16 h/ 8 h         | 4 wks               | Rhizoid                        |                              |
| B. ochracea Schltr.                      | White, blue                                                    | NDM              | 2% suc.        | 0.2% pg           | –                                              | 25±2 °C          | 16 h/ 8 h         | 3 months            | Plantlet regeneration          |                              |
| B. ochracea Schltr.                      | White, blue                                                    | NDM              | 2% suc.        | 0.2% pg           | –                                              | 25±2 °C          | 16 h/ 8 h         | 3 months            | Pseudobulb                     |                              |
| Calanthe                                 | Red + blue                                                     |                  | 1.5% & 3% suc. | 0.2% ag           | –                                              | 25±2 °C          | 16 h/ 8 h         | 8 wks               | Plantlet regeneration          | Baque et al. 2011            |
| Doritaenopsis                            | Red + blue                                                     | mHm              | 2% suc.        | 0.55% ag          | 30 g/L potato homogenate, 2 g/L Pt, 0.5 g/L ac | –                | 16 h/ 8 h         | 2, 5, 8 wks         | Plantlet regeneration          | Shin et al. 2008             |
| Microlaelia lundii                       | Blue                                                           | SM               | 3% suc.        | 0.8% ag           | 1 g/L ac                                       | 25±2 °C          | 16 h/ 8 h         | 200 days            | Plantlet regeneration          | Favetta et al. 2017          |
| Rose                                     |                                                                |                  |                |                   |                                                |                  |                   |                     |                                |                              |

|                                                      |                                                                                                                                               |    |         |          |                                                                                       |                               |            |              |                                                                                                                                                          |                              |
|------------------------------------------------------|-----------------------------------------------------------------------------------------------------------------------------------------------|----|---------|----------|---------------------------------------------------------------------------------------|-------------------------------|------------|--------------|----------------------------------------------------------------------------------------------------------------------------------------------------------|------------------------------|
| Rose                                                 | Blue                                                                                                                                          | MS | 3% suc. | 0.25% gr | 0.5 mg/L BAP + 0.1 g/L MI + 0.1g/L Ferrum                                             | 26±1 °C                       | 16 h/ 8 h  | 2, and 4 wks | Plantlet regeneration                                                                                                                                    | Azmi et al. 2015             |
| <i>Rosa × kordesii</i>                               | 80% red + 20% blue                                                                                                                            | MS | 3% suc. | 0.25% gr | 1.5 g/L BAP + 0.1 mg/L IBA + 0.1 g/L MI + 0.1g/L Ferrum                               | 26±1 °C                       | 16 h/ 8 h  | 30 days      | Plantlet regeneration                                                                                                                                    | Azmi et al. 2014             |
| <b>Chrysanthemum</b>                                 |                                                                                                                                               |    |         |          |                                                                                       |                               |            |              |                                                                                                                                                          |                              |
| <i>Chrysanthemum</i> ×<br><i>grandiflorum</i>        | 8% blue + 2% green + 65% red + 25% far-red                                                                                                    | MS | 3% suc. | 0.8% gr  | –                                                                                     | 23±0.5 °C                     | 16 h/ 8 h  | 10 wks       | Plantlet regeneration                                                                                                                                    | Miler et al. 2019            |
| <i>C. morifolium</i> cv. Ramat. Ellen                | 78% red + 14% blue + 8% far-red                                                                                                               | MS | –       | –        | 0.2 mg/L IAA + 0.05 mg/L BAP + ½ NH <sub>4</sub> NO <sub>3</sub> + ½ KNO <sub>3</sub> | –                             | –          | 42 days      | Plantlet regeneration                                                                                                                                    | Kurilčik et al. 2008         |
| <i>Dendranthema grandiflorum</i> cv. Kitam ‘Cheonsu’ | Red, and far-red (plant growth), red + blue (stomata size)                                                                                    | MS | 3% suc. | 0.24% gr | –                                                                                     | 25 °C (day) and 18 °C (night) | 16 h/ 8 h  | 5 wks        | Plantlet regeneration                                                                                                                                    | Kim et al. 2004              |
| <b>Weeping fig</b>                                   |                                                                                                                                               |    |         |          |                                                                                       |                               |            |              |                                                                                                                                                          |                              |
| <i>Ficus benjamina</i>                               | WF                                                                                                                                            | MS | 3% suc. | 0.6% gr  | 4 mg/L BA + 30 mg/L addenine sulfate                                                  | 23±0.5 °C                     | 16 h/ 8 h  | 12 wks       | Plantlet regeneration                                                                                                                                    | Miler et al. 2019            |
| <b>Gerbera</b>                                       |                                                                                                                                               |    |         |          |                                                                                       |                               |            |              |                                                                                                                                                          |                              |
| <i>Gerbera jamesonii</i>                             | 70% red + 30% blue with 80 µmol m <sup>-2</sup> s <sup>-1</sup> photosynthetic photon flux density                                            | MS | 3% suc. | 0.5% bag | 5 µM BA + 0.5 µM NAA                                                                  | 23/21±1 °C                    | 16 h/ 8 h  | 6 wks        | Shoot multiplication                                                                                                                                     | Cioć et al. 2019             |
| <i>G. jamesonii</i>                                  | 12% blue + 19% green + 61% red + 8% far-red; 8% blue + 2% green + 65% red + 25% far-red; 1% UV + 20% blue + 39% green + 35% red + 5% far-red; | MS | 3% suc. | 0.8% gr  | 3 mg/L KIN                                                                            | 23±0.5 °C                     | 16 h/ 8 h  | 8 wks        | Plantlet regeneration                                                                                                                                    | Miler et al. 2019            |
| <i>G. jamesonii</i>                                  | Red (shoot), blue (leaf size)                                                                                                                 | MS | 3% suc. | 0.5% bag | 1 µM IAA                                                                              | 25 °C (day) and 23 °C (night) | 16 h/ 8 h  | 6 wks        | Acclimatization efficiency                                                                                                                               | Pawłowska et al. 2018a       |
| <i>G. jamesonii</i> cv. “Dura”                       | 50% red + 50% blue (SM); 70% red + 30% blue (SM, PPC, abc); 100% red (SE); 100% blue (LDW)                                                    | MS | 3% suc. | 0.5% bag | 5 µM BA + 0.5 µM NAA                                                                  | 25 °C (day) and 23 °C (night) | 16 h/ 8 h  | 6 wks        | Shoot multiplication (SM); shoot elongation (SE); Photosynthetic pigment content (PPC); chlorophyll a and b and carotenoids (abc); Leaf dry weight (LDW) | Pawłowska et al. 2018b       |
| <b>Coral bells</b>                                   |                                                                                                                                               |    |         |          |                                                                                       |                               |            |              |                                                                                                                                                          |                              |
| <i>Heuchera</i> × <i>hybrida</i>                     | 8% blue + 2% green + 65% red + 25% far-red                                                                                                    | MS | 3% suc. | 0.8% gr  | 0.1 mg/L BA + 0.1 mg/L IAA                                                            | 23±0.5 °C                     | 16 h/ 8 h  | 13 wks       | Plantlet regeneration                                                                                                                                    | Miler et al. 2019            |
| <b>Bleeding heart</b>                                |                                                                                                                                               |    |         |          |                                                                                       |                               |            |              |                                                                                                                                                          |                              |
| <i>Lamprocapnos spectabilis</i>                      | WF                                                                                                                                            | MS | 3% suc. | 0.8% gr  | 0.25 mg/L BA + 0.25 mg/L IAA                                                          | 23±0.5 °C                     | 16 h/ 8 h  | 9 wks        | Plantlet regeneration                                                                                                                                    | Miler et al. 2019            |
| <b>Anthurium</b>                                     |                                                                                                                                               |    |         |          |                                                                                       |                               |            |              |                                                                                                                                                          |                              |
| <i>Anthurium andreanum</i>                           | Blue or white or blue + red                                                                                                                   | MS | –       | 0.25% pg | PGRs supplemented (not specified)                                                     | 24±2 °C                       | 16 h/ 8 h  | 60 days      | Plantlet regeneration                                                                                                                                    | Bello-Bello et al. 2017      |
| <i>A. andreanum</i>                                  | Blue + red                                                                                                                                    | MS | –       | –        | 2 mg/L BAP                                                                            | –                             | –          | 61 days      | Plantlet regeneration                                                                                                                                    | Martínez-Estrada et al. 2016 |
| <i>A. andreanum</i> Lind.                            | Blue, blue + red                                                                                                                              | MS | 3% suc. | 0.6% ag  | –                                                                                     | 25 °C                         | 12 h/ 12 h | 60 days      | Plantlet regeneration                                                                                                                                    | Gu et al. 2012               |
|                                                      | Red + blue                                                                                                                                    | MS | 3% suc. | 0.6% ag  | –                                                                                     | 25 °C                         | 12 h/ 12 h | 60 days      | Rooting                                                                                                                                                  |                              |



|                                                  |                                                                           |        |         |           |                                               |                                |           |            |                                    |                       |
|--------------------------------------------------|---------------------------------------------------------------------------|--------|---------|-----------|-----------------------------------------------|--------------------------------|-----------|------------|------------------------------------|-----------------------|
| Anthurium (Violeta and Pink Lady)                | 100% red (callus); 25% red + 75% blue or 100% blue (torpedo callus)       | NN     | –       | –         | 1 mg/L 2,4-D + 1 mg/L KIN + 1 mg/L BA         | 24 °C (day) and 18 °C (night)  | 16 h/ 8 h | 30-50 days | Callus                             | Budiarto 2010         |
|                                                  | 100% red or 75% red + 25% blue (SI); 25% red + 75% blue or 100% blue (SM) | NN     | –       | –         | 1 mg/L 2,4-D + 1 mg/L KIN + 1 mg/L BA         | 24 °C (day) and 18 °C (night)  | 16 h/ 8 h | 60 days    | Shoot induction and multiplication |                       |
| <b>Heliconia</b>                                 |                                                                           |        |         |           |                                               |                                |           |            |                                    |                       |
| <i>Heliconia champneiana</i> cv. Splash          | 100% red or (70% red + 30% blue                                           | MS     | 3% suc. | 0.18 gg   | 3 mg/L BAP                                    | 25±2 °C                        | 16 h/ 8 h | 6, 12 wks  | Plantlet regeneration              | Rodrigues et al. 2018 |
| <b>Paeony</b>                                    |                                                                           |        |         |           |                                               |                                |           |            |                                    |                       |
| <i>Paeonia suffruticosa</i>                      | 80% red + 20% blue                                                        | WPM    | 3% suc. | 0.21 gg   | 4 mg/L IBA                                    | 25±1 °C                        | 16 h/ 8 h | 45 days    | Plantlet regeneration              | Wang et al. 2012b     |
| <b>Spurflowers</b>                               |                                                                           |        |         |           |                                               |                                |           |            |                                    |                       |
| <i>Plectranthus scutellarioides</i>              | 80% red + 20% green                                                       | MS     | 3% suc. | 0.8% ag   | 0.5 g/L 2-(N-morpholino) ethane sulfonic acid | 25±1.5 °C                      | 16 h/ 8 h | 28 days    | Plantlet regeneration              | Cho et al. 2019       |
| <b>Crown of thorns</b>                           |                                                                           |        |         |           |                                               |                                |           |            |                                    |                       |
| <i>Euphorbia millii</i>                          | Blue                                                                      | MS     | 3% suc. | 0.8% ag   | 1 mg/L BA + 0.3 mg/L IAA                      | 25 °C                          | 16 h/ 8 h | 8 wks      | Plantlet regeneration              | Dewir et al. 2005     |
| <b>Lilies</b>                                    |                                                                           |        |         |           |                                               |                                |           |            |                                    |                       |
| <i>Spathiphyllum cannifolium</i>                 | red, red + far-red (1:1)                                                  | MS     | 3% suc. | 0.2% gr   | 1 mg/L BA + 0.3 mg/L IAA                      | 25 °C                          | 16 h/ 8 h | 2 wks      | Shoot proliferation                | Dewir et al. 2005     |
| <i>Lilium</i> hybrid “Pesaro”                    | Red + blue                                                                | MS     | 3% suc. | 0.24% gr  | 1 mg/L BA + 0.3 mg/L NAA                      | –                              | –         | 60 days    | Bulblets generation                | Lian et al. 2012      |
| <b>Giant protea</b>                              |                                                                           |        |         |           |                                               |                                |           |            |                                    |                       |
| <i>Protea cynaroides</i>                         | red                                                                       | MS     | 3% suc. | 0.9% ag   | –                                             | 21±2 (day) and 12±2 °C (night) | 16 h/ 8 h | 45 days    | Shoot and root regeneration        | Wu and Lin 2012       |
| <b>Red ginger</b>                                |                                                                           |        |         |           |                                               |                                |           |            |                                    |                       |
| <i>Alpinia purpurata</i> “Red Ginger” and “Pink” | white (other LED were not applied)                                        | MS     | 3% suc. | 0.6% ag   | 1.5 mg/L BAP + 0.1 mg/L NAA + 100 mg/L MI     | 25±2 °C                        | 16 h/ 8 h | 55 days    | Plantlet regeneration              | Pinheiro et al. 2019  |
| <b>Tsuru-rindo</b>                               |                                                                           |        |         |           |                                               |                                |           |            |                                    |                       |
| <i>Tripterospermum japonicum</i>                 | red (root), 70% red + 30% blue (plant growth)                             | MS 3%  | suc.    | 0.3% gr – | 24±1 °C 16 h/ 8 h 2, and 4 wks Plantlet       |                                |           |            | regeneration Moon et al. 2006      |                       |
| <b>Hosta</b>                                     |                                                                           |        |         |           |                                               |                                |           |            |                                    |                       |
| <i>Hosta plantaginea</i> “Joseon”                | red                                                                       | MS     | 3% suc. | 0.8% ag   | 0.1 mg/L MI                                   | 23±1 °C                        | 16 h/ 8 h | 6wks       | Plantlet regeneration              | Ku et al. 2016        |
| <b>Poplar</b>                                    |                                                                           |        |         |           |                                               |                                |           |            |                                    |                       |
| <i>Populus euramericana</i> “Dorskamp”           | 50% red + 50% blue                                                        | 1/2 MS | 3% suc. | 0.3% gr   | 4.4 μM BA + 2.2 μM ZT                         | 24±1 °C                        | 16 h/ 8 h | 4 wks      | Shoot regeneration                 | Kwon et al. 2015      |

Table S5. Studies in combination of light emitting diodes (LEDs) and plant growth regulators in vitro culture in ornamentals.

| Plant species | Effective LEDs | Media | Carbon source | Solidifying agent | Effective PGRs | Temperature | Photoperiod ( light/dark) | Culture period | Organogenesis/ regeneration | Ref |
|---------------|----------------|-------|---------------|-------------------|----------------|-------------|---------------------------|----------------|-----------------------------|-----|
|---------------|----------------|-------|---------------|-------------------|----------------|-------------|---------------------------|----------------|-----------------------------|-----|

|                                            |                                  |                  |          |              |                                                      |                            |           |         |                       |                                |
|--------------------------------------------|----------------------------------|------------------|----------|--------------|------------------------------------------------------|----------------------------|-----------|---------|-----------------------|--------------------------------|
| <b>Cymbidium orchid</b>                    |                                  |                  |          |              |                                                      |                            |           |         |                       |                                |
| <i>Cymbidium dayanum</i>                   | Green                            | mMS <sup>1</sup> | 2% suc.  | 0.2% pg      | 0.1 mg/L chondroitin sulfate                         | 25±1 °C                    | 16 h/ 8 h | 5-7 wks | PLB regeneration      | Nahar et al. 2016              |
| <i>C. finlaysonianum</i>                   | Green                            | mMS <sup>1</sup> | 2% suc.  | 0.2% pg      | 1 mg/L chondroitin sulfate                           | 25±1 °C                    | 17 h/ 8 h | 5-7 wks | PLB regeneration      |                                |
| <i>C. insigne</i>                          | Green                            | mMS <sup>1</sup> | 2% suc.  | 0.2% pg      | 1 mg/L CS                                            | 25±1 °C                    | 16 h/ 8 h | 8 wks   | PLB regeneration      | Nahar et al. 2013              |
| <i>C. dayanum</i>                          | Blue                             | mMS <sup>1</sup> | 2% suc.  | 0.2% pg      | 1 mg/L HA9                                           | –                          | 16 h/ 8 h | 5 wks   | PLBs proliferation    | Nahar et al. 2017              |
|                                            | red or green                     | mMS <sup>1</sup> | 2 % suc. | 0.2 % pg     | 1 mg/L Ch                                            | –                          | 17 h/ 8 h | 6 wks   | PLBs proliferation    |                                |
| <b>Dendrobium orchid</b>                   |                                  |                  |          |              |                                                      |                            |           |         |                       |                                |
| <i>Dendrobium okinawense</i>               | green                            | mMS <sup>1</sup> | 2% suc.  | 0.22% pg     | 0.01 mg/L PCIB                                       | 25±1 °C                    | 16 h/ 8 h | 42 days | PLB proliferation     | Mehbub et al. 2022             |
| <i>D kingianum</i>                         | White (other LEDs were not used) | mMS <sup>1</sup> | 2 % suc. | 0.22 % pg    | <b>Expt BA</b> : 0.1 g/L; <b>Expt HA9</b> : 0.1 mg/L | 25±1 °C                    | 16 h/ 8 h | 5 wks   | PLB regeneration      | Habiba et al. 2014             |
| <b>Gerbera</b>                             |                                  |                  |          |              |                                                      |                            |           |         |                       |                                |
| <i>Gerbera jamesonii</i> cv. Queen Rebecca | red, green                       | MS               | –        | –            | 5 mg/L KN                                            | 20-23 °C                   | 16h /8h   | 8 wks   | Shoot multiplication  | Gabryszewska and Rudnicki 1995 |
|                                            | red                              | MS               | –        | –            | 5 mg/L IAA                                           | 20 -24 °C                  | 16 h /8h  | 9 wks   | Rooting               |                                |
| <b>Myrtle</b>                              |                                  |                  |          |              |                                                      |                            |           |         |                       |                                |
| <i>Myrtus communis</i>                     | red                              | MS               | 3% suc.  | 0.5% bio ag  | 1 or 5 µM BA                                         | 23/21±1 °C<br>( day/night) | 16h /8h   | 6 wks   | Plantlet regeneration | Cioć et al. 2018               |
|                                            | 100 % blue or 70% red + 30% blue | MS               | 3 % suc. | 0.5 % bio ag | 5 µM BA                                              |                            | 16 h /8h  | 6 wks   | Fresh weight          |                                |
| <b>Bells of Ireland/ Shellflower</b>       |                                  |                  |          |              |                                                      |                            |           |         |                       |                                |
| <i>Moluccella laevis</i> L.                | PAR LED                          | MS               | 3% suc.  | 0.6% ag      | 3 µM BA + 0.5 µM NAA                                 | 25±0.5 °C                  | 16h /8h   | 3 wks   | Shoot multiplication  | Zielińska et al. 2020          |

## Supplemental references

1. Abu-Qaoud, H. Direct regeneration in *Cyclamen persicum* Mill. using seedling tissues. *An-Najah Univ. J. Res.-A* **2004**, *18*, 147–156.
2. Acemi, A. Chitosan versus plant growth regulators: a comparative analysis of their effects on in vitro development of *Serapias vomeracea* (Burm.f.) Briq. *Plant Cell Tiss. Organ Cult.* **2020**, *141*, 327–338.
3. Acemi, A.; Bayrak, B.; Çakır, M.; Demiryürek, E.; Gün, E.; Gueddari, N.E.E.; Özen, F. Comparative analysis of the effects of chitosan and common plant growth regulators on in vitro propagation of *Ipomoea purpurea* (L.) Roth from nodal explants. *In Vitro Cell. Dev. Biol.-Plant* **2018**, *54*, 537–544.
4. Afrin, S.; Rahman, M.A.; Khalekuzzaman, M.; Hasan, M.M.; Fahim, A.H.F.; Alam, M.A. Study on in vitro micropropagation of *Rosa* sp. *Bangladesh J. Agri.* **2022**, *47*, 66–74.
5. Ali, M.; Baloch, S.K.; Seema, N.; Yaeen, S.; Kaleri, A.A.; Kaleri, R.R.; Nizamani, G.S.; Subhapoto, G.F.; Kaleri, M.A.; Shahani, F.; Shahani, M. Influence of phytohormones on callus indication and micropropagation on rose (*Rosa indica* L.). *Journal of Basic & Applied Sciences* **2018**, *14*, 9–11.
6. Ali, M.R.; Mehraj, H.; Uddin, A.F.M.J. Kinetin (KIN) and indole-3-acetic acid (IAA) on in vitro shoot and root initiation of tuberose. *Int. J. Sust. Agril. Technol.* **2014**, *10*, 1–4.
7. Ali, M.R.; Akand, M.; Homaýra, H.; Mehraj, H.; Uddin, A.F.M.J. In vitro regeneration and rapid multiplication of tuberose. *Int. J. Bus. Soc. Sci. Res.* **2015**, *3*, 35–38.
8. Alsemaan, T. Micro-propagation of Damask rose (*Rosa damascena* Mill.) cv. Almarah. *Int. J. Agric. Res.* **2013**, *8*, 172–177.
9. Amer, E.M.; Fetouh, M.I.; Rasha, S.E. Micropropagation and acclimatization of *Gardenia jasminoides* Ellis. *J. Biol. Chem. Environ. Sci.* **2019**, *14*, 107–120.
10. Asghar, S.; Ahmad, T.; Hafiz, I. A.; Yaseen, M. In vitro propagation of orchid (*Dendrobium nobile*) var. Emma white. *Afr. J. Biotechnol.*, **2011**, *10*, 3097–3103.
11. Aslam, J.; Mujib, A.; Sharma, M.P. In vitro micropropagation of *Dracaena sanderiana* Sander ex Mast: An important indoor ornamental plant. *Saudi J. Biol. Sci.* **2013**, *20*, 63–68.
12. Aung, W.T.; Bang, K.S.; Yoon, S.A.; Ko, B.; Bae, J.H. Effects of different natural extracts and plant growth regulators on plant regeneration and callus induction from pseudobulbs explants through in vitro seed germination of endangered orchid *Bulbophyllum auricomum* Lindl. *J. Bio-Environ. Con.* **2022**, *31*, 133–141.
13. Azmi, N.S.; Ahmad, R.; Ibrahim, R. Effects of red and blue (RB) LED on the in vitro growth of *Rosa kordesii* in multiplication phase. In 2nd International Conference on Agriculture and Biotechnology, IACSIT Press, Singapore, Volume 79, 2014.
14. Azmi, N.S.; Ahmad, R.; Ibrahim, R. Fluorescent light (FL), red led and blue led spectrums effects on in vitro shoots multiplication. *J. Teknol.* **2016**, *78*, 6.
15. Baker, A.; Kaviani, B.; Nematzadeh, G.; Negahdar, N. Micropropagation of *Orchis catasetum*—A rare and endangered orchid. *Acta Sci. Pol.-Hortorum Cultus* **2014**, *13*, 197–205.
16. Bakheet, G.I.; Soliman, S.S.; Abdelkader, M.A.I.; Elashokhy, M.M.A. Effects of different croton (*Codiaeum variegatum* L.) genotypes and growth regulators on callus induction, micro propagation and antibacterial activities. *Zagazig J. Agric. Res.* **2018**, *45*, 331–347.
17. Balilashaki, K.; Vahedi, M.; Karimi, R. In vitro direct regeneration from node and leaf explants of *Phalaenopsis* cv. 'Surabaya'. *Plant Tissue Cult. Biotech.* **2015**, *25*, 193–205.
18. Baque, A.M.; Shin, Y.K.; Elshmary, T.; Lee, E.J.; Paek, K.Y. Effect of light quality, sucrose and coconut water concentration on the micropropagation of *Calanthe* hybrids ('Bukduseong' 'Hyesung' and 'Chunkwang' 'Hyesung'). *Aust. J. Crop Sci.* **2011**, *5*, 1247–1254.
19. Bello-Bello, J.J.; Perez-Sato, J.A.; Cruz-Cruz, C.A.; Martinez-Estrada, E. Light-emitting diodes: progress in plant micropropagation. In *Chlorophyll*, Jacob-Lopes, E., Zepka, L.Q., Queiroz, M.I., Eds.; IntechOpen: London, UK, Chapter 6, 2017; pp 93–103.
20. Belokurova, V.; Lystvan, K.; Volga, D.; Vasylenko, M.; Kuchuk, M. In vitro culture and some biochemical characteristics of *Fittonia albivenis* (Lindl. ex Veitch) Brummitt. *Agrobiodiv. Impr. Nut. Health Life Qual.* **2019**, *3*, 186–194.
21. Bhatt, A.; Stanly, C.; Keng, C.L. In vitro propagation of five *Alocasia* species. *Hortic. Bras.* **2013**, *31*, 210–215.
22. Bhattacharjee, B.; Islam, S.S. Effects of plant growth regulators on multiple shoot induction in *Vanda tessellata* (Roxb.) Hook. Ex G. Don an endangered medicinal orchid. *Int. J. Sci. Nat.* **2014**, *5*, 707–712.
23. Bhattacharyya, P.; Kumaria, S.; Job, N.; Tandon, P. Phyto-molecular profiling and assessment of antioxidant activity within micropropagated plants of *Dendrobium thyrsiflorum*: a threatened, medicinal orchid. *Plant Cell Tiss. Organ Cult.* **2015**, *122*, 535–550.
24. Bhattacharyya, P.; Kumaria, S.; Tandon, P. High frequency regeneration protocol for *Dendrobium nobile*: a model tissue culture approach for propagation of medicinally important orchid species. *S. Afr. J. Bot.* **2016**, *104*, 232–243.
25. Bhowmik, T.K.; Rahman, M.M. Micropropagation of commercially important orchid *Dendrobium palpebrae* Lindl. through in vitro developed pseudobulb culture. *J. Adv. Biotechnol. Exp. Ther.* **2020**, *3*, 225–232.
26. Billore, V.; Jain, M.; Suprasanna, P. Monochromatic radiation through light-emitting diode (LED) positively augments in vitro shoot regeneration in Orchid (*Dendrobium sonia*). *Can. J. Biotech.* **2017**, *1*, 50.

27. Billore, V.; Mirajkar, S.J.; Suprasanna, P.; Jain, M. Gamma irradiation induced effects on in vitro shoot cultures and influence of monochromatic light regimes on irradiated shoot cultures of *Dendrobium sonia* orchid. *Biotechnol. Rep.* **2019**, *22*, e00343.
28. Budiarto, K. Spectral quality affects morphogenesis on anthurium plantlet during in vitro culture. *AGRIVITA J. Agric. Sci.* **2010**, *32*, 234–240.
29. Bustam, B.M.; Dixon, K.; Bunn, E. *Ex situ* germplasm preservation and plant regeneration of a threatened terrestrial orchid, *Caladenia huegelii*, through micropropagation and cryopreservation. *Aust. J. Bot.* **2016**, *64*, 659–663.
30. Cardoso, J.C. Silver nitrate enhances *in vitro* development and quality of shoots of *Anthurium andraeanum*. *Sci. Hortic.* **2019**, *253*, 358–363.
31. Cardoso, J.C.; Habermann, G. Adventitious shoot induction from leaf segments in *Anthurium andraeanum* is affected by age of explant, leaf orientation and plant growth regulator. *Hortic. Environ. Biotechnol.* **2014**, *55*, 56–62.
32. Chauhan, S.; Promila Pathak, A.; Sharma, S.K. Teepol Regeneration of *Eulophia dabia* through rhizome explants and flowering: a study *in vitro*. *J. Orchid Soc. India* **2015**, *29*, 61–65.
33. Chavan, J. J.; Gaikwad, N. B.; Yadav, S. R. High multiplication frequency and genetic stability analysis of *Ceropegia panchganiensis*, a threatened ornamental plant of Western Ghats: conservation implications. *Sci. Hortic.* **2013**, *161*, 134–142.
34. Chavan, J.J.; Gaikwad, N.B.; Kshirsagar, P.R.; Umdale, S.D.; Bhat, K.V.; Dixit, G.B.; Yadav, S.R. Highly efficient *in vitro* proliferation and genetic stability analysis of micropropagated *Ceropegia evansii* by RAPD and ISSR markers: a critically endangered plant of Western Ghats. *Plant Biosyst.* **2015**, *149*, 442–450.
35. Chavan, J.J.; Nalawade, A.S.; Gaikwad, N.B.; Gurav, R.V.; Dixit, G.B.; Yadav, S.R. An efficient in vitro regeneration of *Ceropegia noorjahaniae*: an endemic and critically endangered medicinal herb of the Western Ghats. *Physiol. Mol. Biol. Plants* **2014**, *20*, 405–410.
36. Chavan, J.J.; Nimbalkar, M.S.; Adsul, A.A.; Kamble, S.S.; Gaikwad, N.B.; Dixit, G.B.; Gurav, R.V.; Bapat, V.A.; Yadav, S.R. Micropropagation and in vitro flowering of endemic and endangered plant *Ceropegia attenuata* Hook. *J. Plant Biochem. Biotechnol.* **2011**, *20*, 276–282.
37. Chen, B.; Trueman, S. J.; Li, J.; Li, Q.; Fan, H.; Zhang, J. Micropropagation of the endangered medicinal orchid, *Dendrobium officinale*. *Life Sci. J.* **2014**, *11*, 526–530.
38. Chen, J.T.; Chang, W.C. Direct somatic embryogenesis and plant regeneration from leaf explants of *Phalaenopsis amabilis*. *Biol. Plant.* **2006**, *50*, 169–173.
39. Chen, J.T.; Chang, W.C. TIBA affects the induction of direct somatic embryogenesis from leaf explants of *Oncidium*. *Plant Cell Tiss. Organ Cult.* **2004**, *79*, 315–320.
40. Chhargri, M.A.; Khan, M.T.; Nizamani, G.S.; Yasmeen, S.; Khan, I.A.; Aslam, M.M.; Rajpar A.A.; Tayyaba, Nizamani F.; Nizamani M.R.; Iqbal R.; Panhwar M.J.; Siddiqui, M.A. Effect of plant growth hormones on shoot and root regeneration in rose under *in vitro* conditions. *Adv. Life Sci.* **2020**, *8*, 93–97.
41. Cho, K.H.; Laux, V.Y.; Wallace-Springer, N.; Clark, D.G.; Folta, K.M.; Colquhoun, T.A. Effects of light quality on vegetative cutting and in vitro propagation of coleus (*Plectranthus scutellarioides*). *HortSci.* **2019**, *54*, 926–935.
42. Choi, H.; Yang, J.C.; Ryu, S.H.; Yoon, S.M.; Kim, S.Y.; Lee, S.Y. *In vitro* multiplication of *Hosta* Tratt. species native to Korea by shoot-tip culture. *Korean J. Plant Resour.* **2019**, *32*, 53–62.
43. Chookoh, N.; Chiu, Y.T.; Chang, C.; Hu, W.H.; Dai, T.E. Micropropagation of *Tolumnia* orchids through induction of protocorm-like bodies from leaf segments. *HortSci.* **2019**, *54*, 1230–1236.
44. Cioć, M.; Kalisz, A.; Żupnik, M.; Pawłowska, B. Different LED light intensities and 6-benzyladenine concentrations in relation to shoot development, leaf architecture, and photosynthetic pigments of *Gerbera jamesonii* Bolus *in vitro*. *Agronomy* **2019**, *9*, 358.
45. Cioć, M.; Szewczyk, A.; Żupnik, M.; Kalisz, A.; Pawłowska, B. LED lighting affects plant growth, morphogenesis and phytochemical contents of *Myrtus communis* L. *in vitro*. *Plant Cell Tiss. Organ Cult.* **2018**, *132*, 433–447.
46. Coello, C.Y.; Miceli, C.L.; Orantes, C.; Dendooven, L.; Gutiérrez, F.A. Plant growth regulators optimization for *in vitro* cultivation of the orchid *Guarianthe skinneri* (Bateman) Dressier & WE Higgins. *Gayana Bot.* **2010**, *67*, 19–26.
47. Cybularz-Urban, T.; Hanus-Fajerska, E.; Swiderski, A. Effect of light wavelength on in vitro organogenesis of a *Cattleya* hybrid. *Acta Biol. Crac. Ser. Bot.* **2007**, *49*, 113–118.
48. da Silva, J.A.T. Response of hybrid *Cymbidium* (Orchidaceae) protocorm-like bodies to 26 plant growth regulators. *Bot. Lith.* **2014a**, *20*, 3–13. da Silva, J.A.T. The effect of ethylene inhibitors (AgNO<sub>3</sub>, AVG), an ethylene-liberating compound (CEPA) and aeration on the formation of protocorm-like bodies of hybrid *Cymbidium* (Orchidaceae). *Front. Biol.* **2013**, *8*, 606–610.
49. da Silva, J.A.T. The response of protocorm-like bodies of nine hybrid *Cymbidium* cultivars to light-emitting diodes. *Environ. Exp. Biol.* **2014b**, *12*, 155–159.
50. Daneshvar, M.H.; Havil, M.; Lotfi Jalal-Abadi, A. Micropropagation of *Polianthes tuberosa* L. through direct organogenesis. *J. Plant Prod.* **2022**, *45*,
51. Decruse, S.W.; Gangaprasad, A.; Seeni, S.; Menon, V.S. A protocol for shoot multiplication from foliar meristem of *Vanda spathulata* (L.) Spreng. *Indian J. Exp. Biol.* **2003**, *41*, 924–927.

52. Deshmukh, V.D.; Kharde, A.V.; Talekar, B.K. Interactive effects of BA and IAA on shoot proliferation of gladiolus (*Gladiolus grandiflorus*) var. White Prosperity. *J. Oriental Res. Madras* **2021**, XC, II-VII.
53. Devi, P.; Kumar, P.; Sengar, R.S.; Yadav, M.K.; Kumar, M.; Singh, S.K.; Singh, S. *In-vitro* multiple shoots production from cormel shoot buds in gladiolus (*Gladiolus hybrida*). *Int. J. Curr. Microbiol. App. Sci.* **2019**, 8, 1345–1350.
54. Dewir, Y.H.; Chakrabarty, D.; Kim, S.J.; Hahn, E.J.; Paek, K.Y. Effect of light-emitting diode on growth and shoot proliferation of *Euphorbia millii* and *Spathiphyllum cannifolium*. *J. Kor. Soc. Hort. Sci.* **2005**, 46, 375–379.
55. Dhir, R.; Shekhawat, G.S. Ecorehabilitation and biochemical studies of *Ceropegia bulbosa* Roxb.: a threatened medicinal succulent. *Acta Physiol. Plant.* **2014**, 36, 1335–1343.
56. Dhir, R.; Shekhawat, G.S. Production, storability and morphogenic response of alginate encapsulated axillary meristems and genetic fidelity evaluation of *in vitro* regenerated *Ceropegia bulbosa*: a pharmaceutically important threatened plant species. *Ind. Crops Prod.* **2013**, 47, 139–144.
57. Doğan, S.; Çağlar, G.; Palaz, E. B. The effect of different applications on *in vitro* bulb development of an endemic hyacinth plant (*Hyacinthus orientalis* L. subsp. *chionophyllus* Wendelbo) grown in Turkey. *Turkish JAF Sci. Technol.* **2020**, 8, 1713–1719.
58. Driver, J.A.; A.H. Kuniyuki. *In vitro* propagation of Paradox walnut rootstock. *HortSci.* **1984**, 19, 507–509.
59. Duhoky, M.M.; Al-Mizory, L.S. *In vitro* micropropagation of selected *Bougainvillea* sp. through callus induction. *J. Agric. Vet. Sci.* **2014**, 6, 1–6.
60. Faisal, M.; Ahmad, N.; Anis, M. In vitro regeneration and mass propagation of *Ruta graveolens* L.—a multipurpose shrub. *HortSci.* **2005**, 40, 1478–1480.
61. Faisal, M.; Ahmad, N.; Anis, M.; Alatar, A.A.; Qahtan, A.A. Auxin-cytokinin synergism *in vitro* for producing genetically stable plants of *Ruta graveolens* using shoot tip meristems. *Saudi J. Biol. Sci.* **2018**, 25, 273–277.
62. Farooq, I.; Qadri, Z.A.; Rather, Z.A.; Nazki, I.T.; Banday, N.; Rafiq, S.; Mansoor, S. Optimization of an improved, efficient and rapid *in vitro* micropropagation protocol for *Petunia hybrida* Vilm. Cv. “Bravo”. *Saudi J. Biol. Sci.* **2021**, 28, 3701–3709.
63. Favetta, V.; Colombo, R.C.; Mangili Júnior, J.F.; de Faria, R.T. Light sources and culture media in the *in vitro* growth of the Brazilian orchid *Microlaelia lundii*. *Semina: Ciênc. Agrár.* **2017**, 38, 1775–1784.
64. Gabryszewska, E.; Rudnicki, R. The influence of light quality on the shoot proliferation and rooting of *Gerbera jamesonii* *in vitro*. *Acta Agrobot.* **1995**, 48, 105–111.
65. Gajbhiye, S.S.; Tripathi, M.K.; Vidya, M.S.; Singh, M.; Baghel, B.S.; Tiwari, S. Direct shoot organogenesis from cultured stem disc explants of tuberose (*Polianthes tuberosa* Linn.). *J. Agric. Technol.* **2011**, 7, 695–709.
66. Gantait, S.; Sinniah, U.R. Rapid micropropagation of monopodial orchid hybrid (*Aranda* Wan Chark Kuan ‘Blue’ × *Vanda coerulea* Griff. ex. Lindl.) through direct induction of protocorm-like bodies from leaf segments. *Plant Growth Regul.* **2012**, 68, 129–140.
67. Ghareeb, Z.F.; Taha, L.S. Micropropagation protocol for *Antigonon leptopus* an important ornamental and medicinal plant. *J. Genet. Eng. Biotechnol.* **2018**, 16, 669–675.
68. Godo, T.; Fujiwara, K.; Guan, K.; Miyoshi, K. Effects of wavelength of LED-light on *in vitro* asymbiotic germination and seedling growth of *Bletilla ochracea* Schltr. (Orchidaceae). *Plant Biotechnol.* **2011**, 28, 398–400.
69. Goswami, K.; Yasmin, S.; Nasiruddin, K. M.; Khatun, F.; Akte, J. *In vitro* regeneration of *Dendrobium* sp. of orchid using leaf tip as explant. *J. Environ. Sci. Nat. Resour.* **2015**, 8, 75–78.
70. Govindaraju, S.; Arulselvi, P. I. Effect of cytokinin combined elicitors (l-phenylalanine, salicylic acid and chitosan) on *in vitro* propagation, secondary metabolites and molecular characterization of medicinal herb—*Coleus aromaticus* Benth (L.). *J. Saudi Soc. Agric. Sci.* **2018**, 17, 435–444.
71. Gow, W.P.; Chen, J.T.; Chang, W.C. Effects of genotype, light regime, explant position and orientation on direct somatic embryogenesis from leaf explants of *Phalaenopsis* orchids. *Acta Physiol. Plant.* **2009**, 31, 363–369.
72. Gow, W.P.; Chen, J.T.; Chang, W.C. Enhancement of direct somatic embryogenesis and plantlet growth from leaf explants of *Phalaenopsis* by adjusting culture period and explant length. *Acta Physiol. Plant.* **2010**, 32, 621–627.
73. Gu, A.; Liu, W.; Ma, C.; Cui, J.; Henny, R.J.; Chen, J. Regeneration of *Anthurium andraeanum* from leaf explants and evaluation of microcutting rooting and growth under different light qualities. *HortSci.* **2012**, 47, 88–92.
74. Guo, W.L.; Chang, Y.C.A.; Kao, C.Y. Protocorm-like bodies initiation from root tips of *Cyrtopodium paranaense* (Orchidaceae). *HortSci.* **2010**, 45, 1365–1368.
75. Habas, R.R.; Turker, M.; Ozdemir, F.A. *In vitro* multiple shoot regeneration from *Petunia hybrida*. *Turkish JAF Sci. Technol.* **2019**, 7, 1554–1560.
76. Habiba, S.U.; Shimasaki, K.; Ahasan, M.M.; Alam, M.M. Effect of 6-benzylaminopurine (BA) and hyaluronic acid (HA) under white light emitting diode (LED) on organogenesis in protocorm-likebodies (PLBs) of *Dendrobium kingianum*. *Am.-Eurasian J. Agric. Environ. Sci.* **2014**, 14, 605–609.
77. Habiba, S.U.; Shimasaki, K.; Ahasan, M.M.; Alam, M.M. Effects of different light quality on growth and development of protocorm-like bodies (PLBs) in *Dendrobium kingianum* cultured in vitro. *Bangladesh Res. Pub. J.* **2014**, 10, 223–227.
78. Hajong, S.; Kumaria, S.; Tandon, P. Effect of plant growth regulators on regeneration potential of axenic nodal segments of *Dendrobium chrysanthum* Wall. ex Lindl. *J. Agr. Sci. Tech.* **2013**, 15, 1425–1435.

79. Han, B.H.; Yae, B.W.; Yu, H.J.; Peak, K.Y. Improvement of in vitro micropropagation of *Lilium* oriental hybrid 'Casablanca' by the formation of shoots with abnormally swollen basal plates. *Sci. Hortic.* **2005**, *103*, 351–359.
80. Haque, S.M.; Ghosh, B. In vitro completion of sexual life cycle: production of R1 plants of *Ipomoea quamoclit* L. *Propag. Ornament. Plants* **2013**, *13*, 19–24.
81. Hernández-Mendoza, F.; Carrillo-Castañeda, G.; García-Gaytán, V.; Pedraza-Santos, M.; de la Cruz-Torres, E.; MendozaCastillo, M. In vitro plant regeneration of *Polianthes tuberosa* L. from leaf and flower buds tissue. *Trop. Subtrop. Agroecosystems* **2021**, *24*, 55.
82. Hoda, E. In vitro regeneration and somaclonal variation of *Catharanthus roseus* Don. using leaf and internodal explants. *Alex. Sci. Exch. J.* **2013**, *34*, 452–459.
83. Hossen, M.M.; Saha, S.; Khatun, F. Effects of plant growth regulators on in vitro growth and development of orchid (*Dendrobium* sp.) from protocorm like bodies (PLBs). *J. Bangladesh Agric. Univ.* **2021**, *193*, 294–301.
84. Hung, C.Y.; Zhang, J.; Bhattacharya, C.; Li, H.; Kittur, F.S.; Oldham, C.E.; Wei, X.; Burkey, K.O.; Chen, J.; Xie, J. Transformation of long-lived albino *Epipremnum aureum* 'Golden Pothos' and restoring chloroplast development. *Front. Plant Sci.* **2021**, *12*, 647507.
85. Ibrahim, M.A.; Draaj, I.A. The effect of explant source and cytokinin concentration on the direct bulb formation of tulip (*Tulipa gesnerina* L.) by plant tissue culture technique. *Plant Cell Biotechnol. Mol. Biol.* **2020**, *21*, 111–119.
86. Islam, S.S.; Islam, T.; Bhattacharjee, B.; Mondal, T.K.; Subramaniam, S. In vitro pseudobulb based micropropagation for mass development of *Cymbidium finlaysonianum* Lindl. *Emir. J. Food Agric.* **2015**, *27*, 469–474.
87. İzgü, T.; Sevidink, B.; Çürük, P.; Şimşek, Ö.; Kaçar, Y.A.; da Silva, J.A.T.; Mendi, Y. Development of an efficient regeneration protocol for four *Cyclamen* species endemic to Turkey. *Plant Cell Tiss. Organ Cult.* **2016**, *127*, 95–113.
- a. Jabbarzadeh, Z.; Khosh-Khui, M. Factors affecting tissue culture of Damask rose (*Rosa damascena* Mill.). *Sci. Hortic.* **2005**, *105*, 475–482.
88. Jainol, J.E.; Gansau, J.A. Effect of growth regulators and explant orientation on shoot tip culture of Borneo endemic orchid, *Dimorphorchis lowii*. *Trans. Sci. Technol.* **2016**, *3*, 306–312.
89. Jalali, N.; Naderi, R.; Shahi-Gharahlar, A.; da Silva, J.A.T. Tissue culture of *Cyclamen* spp. *Sci. Hortic.* **2012**, *137*, 11–19.
90. Javaheri, N.; Kaviani, B. Effect of hormonal combination of auxin and cytokinin on micropropagation of eastern lily (*Lilium* oriental hybrid 'Casablanca') plant using bulb scale explant. *J. Hort. Sci.* **2022**, *36*, 57–69.
91. Kaewjampa, N.; Shimasaki, K. Effects of green LED lighting on organogenesis and superoxide dismutase (SOD) activities in protocorm-like bodies (PLBs) of *Cymbidium* cultured in vitro. *Environ. Control Biol.* **2012**, *50*, 247–254.
92. Kaewjampa, N.; Shimasaki, K.; Nahar, S.J. Hyaluronic acid can be a new plant growth regulator for hybrid *Cymbidium* micropropagation. *Plant Tissue Cult. Biotech.* **2012**, *22*, 59–64.
93. Kalimuthu, K.; Senthilkumar, R.; Vijayakumar, S. In vitro micropropagation of orchid, *Oncidium* sp. (Dancing Dolls). *Afr. J. Biotechnol.* **2007**, *6*, 1171–1174.
94. Kalyan, K.D.; Sil, S. Protocorm-like bodies and plant regeneration from foliar explants of *Coelogyne flaccida*, a horticulturally and medicinally important endangered orchid of eastern himalaya. *Lankesteriana* **2015**, *15*, 151–158.
95. Kananont, N.; Pichyangkura, R.; Chanprame, S.; Chadchawan, S.; Limpanavech, P. Chitosan specificity for the in vitro seed germination of two *Dendrobium* orchids (Asparagales: Orchidaceae). *Sci. Hortic.* **2010**, *124*, 239–247.
96. Kanchanapoom, K.; Posayapisit, N.; Kanchanapoom, K. In vitro flowering from cultured nodal explants of rose (*Rosa hybrida* L.). *Not. Bot. Horti Agrobot. Cluj-Napoca* **2009**, *37*, 261–263.
97. Kanchanapoom, K.; Sakpeth, P.; Kanchanapoom, L. In vitro flowering of shoots regenerated from cultured nodal explants of *Rosa hybrida* cv. 'Heirloom'. *ScienceAsia* **2010**, *36*, 161–164.
98. Kanwar, J.K.; Kumar, S. Influence of growth regulators and explants on shoot regeneration in carnation. *Hort. Sci.* **2009**, *36*, 140–146.
99. Kaur, S.; Bhutani, K.K. In vitro mass propagation of ornamentally and medicinally important *Coelogyne flaccida* Lindl. through pseudobulb segments. *Plant Tissue Cult. Biotech.* **2013**, *23*, 39–47.
100. Kazeroonian, R.; Mousavi, A.; Jari, S.K.; Tohidfar, M. Factors influencing in vitro organogenesis of *Chrysanthemum morifolium* cv. 'Resomee Splendid'. *Iranian J. Biotech.* **2018**, *16*, e1454.
101. Khalafalla, M.M.; Elgaali, E.I.; Ahmed, M.M. In vitro multiple shoot regeneration from nodal explants of *Vernonia amygdalina*-an important medicinal plant. *Afr. Crop Sci. Confer. Proceed.* **2007**, *8*, 747–752.
102. Khanchana, K.; Kannan, M.; Hemaprabha, K.; Ganga, M. Standardization of protocol for sterilization and in vitro regeneration in tuberose (*Polianthes tuberosa* L.). *Int. J. Chem. Stu.* **2019**, *7*, 236–241.
103. Khaskheli, A.J.; Khaskheli, M.I.; Khaskheli, M.A.; Shar, T.; Ahmad, W.; Lighari, U.A.; Khaskheli, M.A.; Khaskheli, A.A.; Makan, F.H. Proliferation, multiplication and improvement of micro-propagation system for mass clonal production of rose through shoot tip culture. *Am. J. Plant Sci.* **2018**, *9*, 296–310.
104. Khatri, P.; Rana, J.S.; Sindhu, A.; Jamdagni, P. Effect of additives on enhanced in-vitro shoot multiplication and their functional group identification of *Chlorophytum borivilianum* Sant. Et Fernand. *SN Appl. Sci.* **2019**, *1*, 1105.
105. Khatun, H.; Khatun, M.; Biswas, M.; Kabir, M.; Al-Amin, M. In vitro growth and development of *Dendrobium* hybrid orchid. *Bangladesh J. Agric. Res.* **2010**, *35*, 507–514.

106. Khatun, K.; Nath, U.K.; Rahman, M.S. Tissue culture of *Phalaenopsis*: Present status and future prospects. *J. Adv. Biotechnol. Exp. Therap.* **2020**, *3*, 273–285.
107. Khatun, M.; Khatun, H.; Khanam, D.; Al-Amin, M. *In vitro* root formation and plantlet development in *Dendrobium* orchid. *Bangladesh J. Agric. Res.* **2010**, *35*, 257–265.
108. Kher, M.M.; Nataraj, M.; Parmar, H.D.; Buchad, H. Micropropagation of *Merremia quinquefolia* (L.) Hallier F. from nodal explants. *J. Hortic. Res.* **2015**, *23*, 13–16.
109. Kim, S.J.; Hahn, E.J.; Heo, J.W.; Paek, K.Y. Effects of LEDs on net photosynthetic rate, growth and leaf stomata of chrysanthemum plantlets in vitro. *Sci. Hortic.* **2004**, *101*, 143–151.
110. Knudson, L. A new nutrient solution for the germination of orchid seed. *Amer. Orchid Soc. Bull.* **1946**, *15*, 214–217.
111. Krishnareddy, P.V.; Pullaiah, T. *In vitro* conservation of *Ceropegia elegans*, an endemic plant of South India. *Afr. J. Biotechnol.* **2012**, *11*, 12443–12449.
112. Kritskaya, T.A.; Kashin, A.S.; Kasatkin, M.Y. Micropropagation and somaclonal variation of *Tulipa suaveolens* (Liliaceae) in vitro. *Russ. J. Dev. Biol.* **2019**, *50*, 209–215.
113. Ku, B. S.; Cho, M. S. *In vitro* multiplication of *Hosta plantaginea* 'Joseon' by shoot-tip culture. *Flower Res. J.* **2016**, *24*, 328–336.
114. Kulus, D.; Miler, N. Application of plant extracts in micropropagation and cryopreservation of bleeding heart: An ornamental-medicinal plant species. *Agriculture* **2021**, *11*, 542.
115. Kumar, A.; Kumar, A.; Sharma, V.; Mishra, A.; Singh, S.; Kumar, P. *In vitro* regeneration of gladiolus (*Gladiolus hybrida* L.): Optimization of growth media and assessment of genetic fidelity. *Int. J. Curr. Microbiol. App. Sci.* **2018**, *7*, 2900–2909.
116. Kumar, A.; Sood, A.; Palni, U.; Gupta, A.; Palni, L.M. Micropropagation of *Rosa damascena* Mill. from mature bushes using thidiazuron. *J. Hort. Sci. Biotechnol.* **2001**, *76*, 30–34.
117. Kumar, V.; Moyo, M.; Van Staden, J. Enhancing plant regeneration of *Lachenalia viridiflora*, a critically endangered ornamental geophyte with high floricultural potential. *Sci. Hortic.* **2016**, *211*, 263–268.
118. Kumaria, S.; Kehie, M.; Bhowmik, S.S.D.; Singh, M.; Tandon, P. *In vitro* regeneration of *Begonia rubrovenia* var. *meisneri* CB Clarke—A rare and endemic ornamental plant of Meghalaya, India. *Indian J. Biotechnol.* **2012**, *11*, 300–303.
119. Kuo, H.L.; Chen, J.T.; Chang, W.C. Efficient plant regeneration through direct somatic embryogenesis from leaf explants of *Phalaenopsis* 'Little Steve'. *In Vitro Cell. Dev. Biol.—Plant* **2005**, *41*, 453–456.
120. Kurilčik, A.; Miklušytė-Čanova, R.; Dapkūnienė, S.; Žilinskaitė, S.; Kurilčik, G.; Tamulaitis, G.; Duchovskis, P.; Žukauskas, A. *In vitro* culture of *Chrysanthemum* plantlets using light-emitting diodes. *Cent. Eur. J. Biol.* **2008**, *3*, 161–167.
121. Kwon, A.R.; Cui, H.Y.; Lee, H.; Lee, H.; Shin, H.; Kang, K.S.; Park, S.Y. Light quality affects shoot regeneration, cell division, and wood formation in elite clones of *Populus euramericana*. *Acta Physiol. Plant.* **2015**, *37*, 65.
122. Le, V.T.; Tanaka, M. Effects of red and blue light-emitting diodes on callus induction, callus proliferation, and protocormlike body formation from callus in *Cymbidium* orchid. *Environ. Control Biol.* **2004**, *42*, 57–64.
123. Lian, M.L.; Murthy, H.N.; Paek, K.Y. Effects of light emitting diodes (LEDs) on the *in vitro* induction and growth of bulblets of *Lilium* oriental hybrid 'Pesaro'. *Sci. Hortic.* **2002**, *94*, 365–370.
124. Liberman, R.; Shahar, L.; Nissim-Levi, A.; Evenor, D.; Reuveni, M.; Oren-Shamir, M. Shoot regeneration from leaf explants of *Brunfelsia calycina*. *Plant Cell Tiss. Organ Cult.* **2010**, *100*, 345–348.
125. Lin, Y.; Li, J.; Li, B.; He, T.; Chun, Z. Effects of light quality on growth and development of protocorm-like bodies of *Dendrobium officinale* in vitro. *Plant Cell Tiss. Organ Cult.* **2011**, *105*, 329–335.
126. Longchar, T.B.; Deb, C.R. Optimization of *in vitro* propagation protocol of *Dendrobium heterocarpum* Wall. ex. Lindl. and clonal genetic fidelity assessment of the regenerates: An orchid of horticultural and medicinal importance. *S. Afr. J. Bot.* **2022**, *149*, 67–78.
127. Luan, V.Q.; Huy, N.P.; Nam, N.B.; Huong, T.T.; Hien, V.T.; Hien, N.T.T.; Hai, N.T.; Thinh, D.K.; Nhut, D.T. *Ex vitro* and *in vitro* *Paphiopedilum delenatii* Guillaumin stem elongation under light-emitting diodes and shoot regeneration via stem node culture. *Acta Physiol. Plant.* **2015**, *37*, 1–11.
128. Lukatkin, A.S.; Mokshin, E.V.; Bolshakova, E.V.; da Silva, J.A.T. Effects of inorganic salts concentration and alternative plant growth regulators on the *in vitro* organogenesis of a new hybrid *Cymbidium*. *BioTechnologia* **2019**, *100*, 279–288.
129. Lukatkin, A.S.; Mokshin, E.V.; da Silva, J.A.T. Use of alternative plant growth regulators and carbon sources to manipulate *Dianthus caryophyllus* L. shoot induction in vitro. *Rend. Fis. Acc. Lincei* **2017**, *28*, 583–588.
130. Luo, J.P.; Wang, Y.; Zha, X.Q.; Huang, L. Micropropagation of *Dendrobium densiflorum* Lindl. ex Wall. through protocormlike bodies: effects of plant growth regulators and lanthanoids. *Plant Cell Tiss. Organ Cult.* **2008**, *93*, 333.
131. Maheswari, N.U.; Vaishnavi, K. *In vitro* micropropagation of *Rosa damascena* Mill. *Asian J. Multidimen. Res.* **2018**, *7*, 107–114.
132. Malabadi, R.B.; Mulgund, G.S.; Kallappa, N. Micropropagation of *Dendrobium nobile* from shoot tip sections. *J. Plant Physiol.* **2005**, *162*, 473–478.
133. Marconi, P.L.; Radice, S. Organogenesis and somatic embryogenesis in *Codiaeum variegatum* (L.) Blume cv. "Corazón de Oro". *In Vitro Cell. Dev. Biol.—Plant* **1997**, *33*, 258–262.

134. Martin, K.P.; Madassery, J. Rapid in vitro propagation of *Dendrobium* hybrids through direct shoot formation from foliar explants, and protocorm-like bodies. *Sci. Hortic.* **2006**, *108*, 95–99.
135. Martínez-Estrada, E.; Caamal-Velázquez, J.H.; Morales-Ramos, V.; Bello-Bello, J.J. Light emitting diodes improve in vitro shoot multiplication and growth of *Anthurium andreanum* Lind. *Propag. Ornam. Plants* **2016**, *16*, 3–8.
136. Maślanka, M.; Bach, A. Induction of bulb organogenesis in in vitro cultures of tarda tulip (*Tulipa tarda* Stapf.) from seedderived explants. *In Vitro Cell. Dev. Biol.–Plant* **2014**, *50*, 712–721.
137. Masnoddin, M.; Repin, R.; Abd Aziz, Z. Micropropagation of an endangered Borneo orchid, *Paphiopedilum rothschildianum* callus using temporary immersion bioreactor system. *Thai Agric. Res. J.* **2016**, *34*, 161–171.
138. Matand, K.; Shoemake, M.; Li, C. High frequency in vitro regeneration of adventitious shoots in daylilies (*Heemerocallis* sp) stem tissue using thidiazuron. *BMC Plant Biol.* **2020**, *20*, 31.
139. Mata-Rosas, M.; Baltazar-García, R.J.; Chávez-Avila, V.M. In vitro regeneration through direct organogenesis from protocorms of *Oncidium tigrinum* Llave & Lex. (Orchidaceae), an endemic and threatened Mexican species. *HortSci.* **2011**, *46*, 1132–1135.
140. Mateen, R.M. Development and optimization of micro-propagation, in vitro methodology for gladiolus. *BioSci. Rev.* **2019**, *1*, 21–36.
141. Matos, A.V.C.D.S.D.; Oliveira, B.S.D.; Oliveira, M.E.B.S.D.; Cardoso, J.C. AgNO<sub>3</sub> improved micropropagation and stimulate in vitro flowering of rose (*Rosa x hybrida*) cv. Sena. *Ornam. Hortic.* **2020**, *27*, 33–40.
142. Mayer, J.L.S.; Stancato, G.C.; Appezzato-Da-Glória, B. Direct regeneration of protocorm-like bodies (PLBs) from leaf apices of *Oncidium flexuosum* Sims (Orchidaceae). *Plant Cell Tiss. Organ Cult.* **2010**, *103*, 411–416.
143. Mehbub, H.; Shimasaki, K.; Mehraj, H. Low concentration of anti-auxin and anti-fungal agent accelerates the PLB regeneration of *Dendrobium okinawense* under green LED. *Plants* **2022**, *11*, 1082.
144. Mehraj, H.; Alam, M.M.; Habiba, S.U.; Mehbub, H. LEDs Combined with CHO Sources and CCC priming PLB regeneration of *Phalaenopsis*. *Horticultrae* **2019**, *5*, 34.
145. Mehraj, H.; Shimasaki, K. In vitro PLBs organogenesis of *Phalaenopsis* using different concentrations of HA9 and HA12 combination. *J. Biosci. Agric. Res.* **2017**, *12*, 1036–1040.
146. Mei-Yin, C.; Sani, H. In vitro plantlet regeneration from nodal explant and callus induction of *Vernonia amygdalina* Delile. *J. Plant Sci.* **2018**, *6*, 1–6.
147. Memon, N.; Qasim, M.; Jaskani, M.J.; Ahmad, R. In vitro cormel production of gladiolus. *Pak. J. Agri. Sci.* **2010**, *47*, 115–123.
148. Mengxi, L.; Zhigang, X.; Yang, Y.; Yijie, F. Effects of different spectral lights on *Oncidium* PLBs induction, proliferation, and plant regeneration. *Plant Cell Tiss. Organ Cult.* **2011**, *106*, 1–10.
149. Miler, N.; Kulus, D.; Woźny, A.; Rymarz, D.; Hajzer, M.; Wierzbowski, K.; Nelke, R.; Szeffs, L. Application of widespectrum light-emitting diodes in micropropagation of popular ornamental plant species: a study on plant quality and cost reduction. *In Vitro Cell. Dev. Biol.–Plant* **2019**, *55*, 99–108.
150. Minerva, G.; Kumar, S. Micropropagation of gerbera (*Gerbera jamesonii* Bolus). In *Protocols for Micropropagation of Selected Economically-important Horticultural Plants*, Lambardi, M., Ozudogru, E., Jain, S., Eds.; Humana Press: New Jersey, USA, Chapter 24, 2012, pp. 305–316.
151. Mirzaei, S.; Zare, A.G.; Jafary, S. Evaluating micropropagation of Kashan Damask rose, Yasooj aromatic rose and their hybrid. *Int. J. Env. Agric. Biotech.* **2019**, *4*, 1407–1413.
152. Mitra, G.C.; Prasad, R.N.; Choudhury, R.A. Inorganic salts & differentiation of protocorms in seed callus of an orchid & correlated changes in its free amino acid content. *Indian J Exp. Biol.* **1976**, *14*, 350–351.
153. Moon, H.K.; Park, S.Y.; Kim, Y.W.; Kim, C.S. Growth of Tsuru-rindo (*Tripterosperrum japonicum*) cultured in vitro under various sources of light-emitting diode (LED) irradiation. *J. Plant Biol.* **2006**, *49*, 174–179.
154. Mose, W.; Daryono, B.S.; Indrianto, A.; Purwantoro, A.; Semiarti, E. Direct somatic embryogenesis and regeneration of an Indonesian orchid *Phalaenopsis amabilis* (L.) Blume under a variety of plant growth regulators, light regime, and organic substances. *Jordan J. Biol. Sci.* **2020**, *13*, 509–518.
155. Nahar, S.J.; Haque, S.M.; Kazuhiko, S. Application of chondroitin sulfate on organogenesis of two *Cymbidium* spp. under different sources of lights. *Not. Sci. Biol.* **2016**, *8*, 156–160.
156. Nahar, S.J.; Haque, S.M.; Shimasaki, K. Effect of light quality and plant growth regulator on organogenesis of orkid *Cymbidium dayanum*. *Bangladesh J. Agric. Res.* **2017**, *42*, 185–190.
157. Nahar, S.J.; Shimasaki, K. Application of 5-aminolevulinic acid for the in vitro micropropagation of *Cymbidium* as a potential novel plant regulator. *Environ. Control Biol.* **2014**, *52*, 117–121.
158. Nahar, S.J.; Shimasaki, K.; Haque, S.M. Chondroitin sulfate can be a new plant growth regulator for *Cymbidium* micropropagation. *Acta Hortic.* **2013**, *1014*, 449–455.
159. Nahar, S.J.; Shimasaki, K.; Huang, C.L.; Naruemol, K. Effect of plant growth regulators on organogenesis in protocormlike body (PLBs) of *Cymbidium dayanum* in vitro. *ARPN J. Agric. Biol. Sci.* **2011**, *6*, 28–33.
160. Nahar, S.J.; Syed, M.H.; Shimasaki, K. Organogenesis of *Cymbidium* orchid using elicitors. *J. Plant Develop.* **2015**, *22*, 13–20.



161. Naing, A.H.; Jeon, S.M.; Han, J.S.; Lim, S.H.; Lim, K.B.; Kim, C.K. Factors influencing *in vitro* shoot regeneration from leaf segments of *Chrysanthemum*. *C. R. Biol.* **2014**, *337*, 383–390.
162. Naing, A.H.; Myint, K.T.; Hwang, Y.J.; Park, I.S.; Chung, J.D.; Lim, K.B. Micropropagation and conservation of the wild medicinal orchid, *Coelogyne cristata*. *Horti. Environ. Biotechnol.* **2010**, *51*, 109–114.
163. Naing, A.H.; Park, K.I.; Chung, M.Y.; Lim, K.B.; Kim, C.K. Optimization of factors affecting efficient shoot regeneration in *Chrysanthemum* cv. Shinma. *Braz. J. Bot.* **2016**, *39*, 975–984.
164. Nasib, A.; Ali, K.; Khan, S. In vitro propagation of croton (*Codiaeum variegatum*). *Pak. J. Bot.* **2008**, *40*, 99–104.
165. Nasiruddin, K.M.; Begum, R.; Yasmin, S. Protocorm like bodies and plantlet regeneration from *Dendrobium formosum* leaf callus. *Asian J. Plant Sci.* **2003**, *2*, 955–957.
166. Nayak, N.R.; Chand, P.K.; Rath, S.P.; Patnaik, S.N. Influence of some plant growth regulators on the growth and organogenesis of *Cymbidium aloifolium* (L.) Sw. seed-derived rhizomes in vitro. *In Vitro Cell. Dev. Biol.–Plant* **1998**, *34*, 185.
167. Nayak, N.R.; Sahoo, S.; Patnaik, S.; Rath, S.P. Establishment of thin cross section (TCS) culture method for rapid micropropagation of *Cymbidium aloifolium* (L.) Sw. and *Dendrobium nobile* Lindl. (Orchidaceae). *Sci. Hortic.* **2002**, *94*, 107–116.
168. Ncube, B.; Finnie, J.F.; Van Staden, J. In vitro regeneration of *Cyrtanthus* species: ornamental plants with medicinal benefits. *In Vitro Cell. Dev. Biol.–Plant* **2015**, *51*, 42–51.
169. Ng, C.Y.; Saleh, N.M. In vitro propagation of *Paphiopedilum* orchid through formation of protocorm-like bodies. *Plant Cell Tiss. Organ Cult.* **2011**, *105*, 193–202.
170. Nge, K.L.; Nwe, N.; Chandkrachang, S.; Stevens, W.F. Chitosan as a growth stimulator in orchid tissue culture. *Plant Sci.* **2006**, *170*, 1185–1190.
171. Nikbakht, A.; Kafi, M.; Mirmasoudi, M.; Babalar M. Micropropagation of damask rose (*Rosa damascena* Mill.) cvs Azaran and Ghamsar. *Int. J. Agri. Biol.* **2005**, *7*, 535–538.
172. Niknejad, A.; Kadir, M.A.; Kadzimin, S.B. In vitro plant regeneration from protocorms-like bodies (PLBs) and callus of *Phalaenopsis gigantea* (Epidendroideae: Orchidaceae). *Afr. J. Biotechnol.* **2011**, *10*, 11808–11816.
173. Nowakowska, K.; Pacholczak, A.; Tepper, W. The effect of selected growth regulators and culture media on regeneration of *Daphne mezereum* L. 'Alba'. *Rend. Fis. Acc. Lincei* **2019**, *30*, 197–205.
174. Olsa, R.A.H.; Abdellatif, I.A.; Osman, M.G.; Abdullah, T.L. Effect of growth regulators in *in vitro* micropropagation of *Ixora coccinea*. *Intl. J. Sci.; Res. Pub.* **2018**, *8*, 144–149.
175. Oo, K.T.; Lwin, K.M.; Khai, A.A. In vitro micropropagation of rose (*Hybrid Rosa* spp.) through plant tissue culture technique. *J. Sci. Innov. Res.* **2021**, *10*, 1–4.
176. Osburn, L.D.; Yang, X.; Li, Y.; Cheng, Z.M. Micropropagation of Japanese honeysuckle (*Lonicera japonica*) and Amur honeysuckle (*L. maackii*) by shoot tip culture. *J. Environ. Hort.* **2009**, *27*, 195–199.
177. Panigrahi, J.; Dholu, P.; Shah, T.J.; Gantait, S. Silver nitrate-induced in vitro shoot multiplication and precocious flowering in *Catharanthus roseus* (L.) G. Don, a rich source of terpenoid indole alkaloids. *Plant Cell Tiss. Organ Cult.* **2018**, *132*, 579–584.
178. Panigrahi, J.; Dholu, P.; Shah, T.J.; Gantait, S. Silver nitrate-induced in vitro shoot multiplication and precocious flowering in *Catharanthus roseus* (L.) G. Don, a rich source of terpenoid indole alkaloids. *Plant Cell Tiss. Organ Cult.* **2018**, *132*, 579–584.
179. Pant, B.; Chand, K.; Paudel, M.R. Joshi, P.R.; Thapa, B.B.; Park, S.Y.; Shakya, S.; Thakuri, L.S.; Rajbahak, S.; Sah, A.K.; Baniya, M.K.; Gurung, P.R.; Maharjan, L.; Rajbhandari, P. Micropropagation, antioxidant and anticancer activity of pineapple orchid: *Dendrobium densiflorum* Lindl. *J. Plant Biochem. Biotechnol.* **2022**, *31*, 399–409.
180. Pant, B.; Swar, S. Micropropagation of *Cymbidium iridioides*. *Nepal J. Sci. Technol.* **2011**, *12*, 91–96.
181. Pant, B.; Thapa, D. In vitro mass propagation of an epiphytic orchid, *Dendrobium primulinum* Lindl. through shoot tip culture. *Afr. J. Biotechnol.* **2012**, *11*, 9970–9974.
182. Papafotiou, M.; Skylourakis, A. In vitro propagation of *Callistemon citrinus*. *Acta Hortic.* **2010**, *885*, 267–270.
183. Parida, R.; Mohanty, S.; Nayak, S. In vitro propagation of *Hedychium coronarium* Koen. through axillary bud proliferation. *Plant Biosyst.* **2013**, *147*, 905–912.
184. Parzymies, M.; Dąbski, M.; Pogorzalet, M.; Kozak, D.; Durlak, W.; Dudkiewicz, M. Rooting of a trumpet creeper (*Campsis radicans* (L.) seem.) microshoots in presence of auxins. *Acta Sci. Pol.–Hortorum Cultus* **2014**, *13*, 187–196.
185. Paudel, M.R.; Pant, B. In vitro micropropagation of rare orchid (*Esmeralda clarkei* Rehb. f.) from shoot tip section. *Int. J. Biol., Pharm. Allied Sci.* **2012**, *1*, 1587–1597.
186. Pawłowska, B.; Cioć, M.; Prokopiuk, B. How LED light rooting in vitro affected *Gerbera* acclimatization efficiency. *Acta Hortic.* **2018a**, *1201*, 583–590.
187. Pawłowska, B.; Żupnik, M.; Szewczyk-Taranek, B.; Cioć, M. Impact of LED light sources on morphogenesis and levels of photosynthetic pigments in *Gerbera jamesonii* grown in vitro. *Hortic. Environ. Biotechnol.* **2018b**, *59*, 115–123.
188. Pe, P.P.W.; Naing, A. H.; Soe, M.T.; Kang, H.; Park, K.I.; Kim, C.K. Establishment of meristem culture for virus-free and genetically stable production of the endangered plant *Hosta capitata*. *Sci. Hortic.* **2020**, *272*, 109591.

189. Picolotto, D.R.N.; Paiva, V.B.D.; Barros, F.D.; Padilha, D.R.C.; Cruz, A.C.F.D.; Otoni, W.C. Micropropagation of *Cyrtopodium paludicolum* (Orchidaceae) from root tip explants. *Crop Breed. Appl. Biotechnol.* **2017**, *17*, 191–197.
190. Pinheiro, M.V.M.; Schmidt, D.; Diel, M.I.; Santos, J.D.; Thiesen, L.A.; Azevedo, G.C.V.D.; Holz, E. *In vitro* propagation of alpinia cultivars in different light sources. *Ornam. Hortic.* **2019**, *25*, 49–54.
191. Plessis, H.J.D.; Nikolova, R.V.; Egan, B.A.; Kleynhans, R. Preliminary study on *in vitro* shoot culture of *Hibiscus coddii* subsp. *barnardii*, an indigenous South African flowering plant. *Ornam. Hortic.* **2021**, *27*, 408–416.
192. Podwyszyńska, M.; Kosson, R.; Treder, J. Polyamines and methyl jasmonate in bulb formation of *in vitro* propagated tulips. *Plant Cell Tiss. Organ Cult.* **2015**, *123*, 591–605.
193. Podwyszyńska, M.; Marasek-Ciolakowska, A. Micropropagation of tulip via somatic embryogenesis. *Agronomy* **2020**, *10*, 1857.
194. Pornpienpakdee, P.; Singhasurasak, R.; Chaivasap, P.; Pichyangkura, R.; Bunjongrat, R.; Chadchawan, S.; Limpanavech, P. Improving the micropropagation efficiency of hybrid *Dendrobium* orchids with chitosan. *Sci. Hortic.* **2010**, *124*, 490–499.
195. Pradhan, S.; Paudel, Y.P.; Pant, B. Efficient regeneration of plants from shoot tip explants of *Dendrobium densiflorum* Lindl., a medicinal orchid. *Afr. J. Biotechnol.* **2013**, *12*, 1378–1383.
196. Prasad, G.; Seal, T.; Mao, A.A.; Vijayan, D.; Lokho, A. Assessment of clonal fidelity and phytomedicinal potential in micropropagated plants of *Bulbophyllum odoratissimum*—An endangered medicinal orchid of Indo Burma megabiodiversity hotspot. *S. Afr. J. Bot.* **2021**, *141*, 487–497.
197. Ptak, A.; Bach, A. Somatic embryogenesis in tulip (*Tulipa gesneriana* L.) flower stem cultures. *In Vitro Cell. Dev. Biol.—Plant* **2007**, *43*, 35–39.
198. Pyati, A.N.; Murthy, H.N.; Hahn, E.J.; Paek, K.Y. *In vitro* propagation of *Dendrobium macrostachyum* Lindl.—a threatened orchid. *Indian J. Exp. Biol.* **2002**, *40*, 620–623.
199. Qu, L.; Chen, J.; Henny, R.J.; Huang, Y.; Caldwell, R.D.; Robinson, C.A. Thidiazuron promotes adventitious shoot regeneration from pothos (*Epipremnum aureum*) leaf and petiole explants. *In Vitro Cell. Dev. Biol.—Plant* **2014**, *50*, 561–567.
200. Quynh, N.P.D.; Pha, N.T. Effect of culture media on micropropagation and *in vitro* flowering of red Eden Rose (*Rosa* ‘Red Eden’). *Dong Thap Univ. J. Sci.* **2020**, *9*, 93–99.
201. Quynh, N.P.D.; Pha, N.T. Effect of culture media on micropropagation and *in vitro* flowering of Red Eden Rose (*Rosa* ‘Red Eden’). *Dong Thap Univ. J. Sci.* **2020**, *9*, 93–99.
202. Raghuvanshi, S.; Tripathi, M.K.; Vidhya-Sankar, M.; Singh, O.P. Establishment of low-cost effective protocol for massive *in vitro* propagation in *Polianthes tuberosa* Linn. *Plant Cell Biotech. Mol. Biol.* **2013**, *14*, 49–59.
203. Rahman, M.S.; Mouri, N.J.; Nandi, N.C.; Akter, S.; Khan, M.S. *In vitro* micropropagation of *Jasminum grandiflorum* L. *Bangladesh J. Sci. Ind. Res.* **2018**, *53*, 277–282.
204. Rathod, H.P.; Pohare, M.B.; Bhor, S.A.; Jadhav, K.P.; Batule, B.S.; Shahakar, S.B.; Wagh, S.G.; Wadekar, H.B.; Kelatkar, S.K.; Kulkarni, M.R. *In vitro* micro propagation of blue passion flower (*Passiflora caerulea* L.). *Trends Biosci.* **2014**, *7*, 30793082.
205. Reddy, M.C.; Bramhachari, P.V.; Murthy, K.S.R. Optimized plant tissue culture protocol for *in vitro* morphogenesis of an endangered medicinal herb *Ceropegia ensifolia* Bedd. *Trop. Subtrop. Agroecosystems* **2015**, *18*, 95–101.
206. Restanto, D.P.; Santoso, B.; Kriswanto, B.; Supardjono, S. The application of chitosan for protocorm like bodies (PLB) induction of orchid (*Dendrobium* sp) *in vitro*. *Agric. Agric. Sci. Procedia* **2016**, *9*, 462–468.
207. Rittirat, S.; Kongruk, S.; Te-chato, S. Induction of protocorm-like bodies (PLBs) and plantlet regeneration from wounded protocorms of *Phalaenopsis cornucervi* (Breda) Blume & Rchb. f. *Int. J. Agric. Technol.* **2012**, *8*, 2397–2407.
208. Riva, S.S.; Islam, A.; Hoque, M.E. *In vitro* regeneration and rapid multiplication of *Dendrobium bensoniae*, an indigenous ornamental orchid. *Agriculturists*, **2016**, *14*, 24–31.
209. Rodrigues, P.H.V.; Arruda, F.; Forti, V.A. Slow-grown *in vitro* conservation of *Heliconia champneiana* cv. Splash under different light spectra. *Sci. Agric.* **2018**, *75*, 163–166.
210. Roy, A.R.; Patel, R.S.; Patel, V.V.; Sajeer, S.; Deka, B.C. Asymbiotic seed germination, mass propagation and seedling development of *Vanda coerulea* Griff ex. Lindl. (Blue Vanda): An *in vitro* protocol for an endangered orchid. *Sci. Hortic.* **2011**, *128*, 325–331.
211. Roy, J.; Banerjee, N. Induction of callus and plant regeneration from shoot-tip explants of *Dendrobium fimbriatum* Lindl. var. *oculatum* Hk. f. *Sci. Hortic.* **2003**, *97*, 333–340.
212. Saito, H.; Nakano, M. Plant regeneration from suspension cultures of *Hosta sieboldiana*. *Plant Cell Tiss. Organ Cult.* **2002**, *71*, 23–28.
213. Saleh-E-In, M.M.; Bhattacharyya, P.; Van Staden, J. Chemical composition and cytotoxic activity of the essential oil and oleoresins of *in vitro* micropropagated *Ansellia africana* Lindl: A vulnerable medicinal orchid of Africa. *Molecules* **2021**, *26*, 4556.
214. Sangavai, C.; Chellapandi, P. *In vitro* propagation of a tuberose plant (*Polianthes tuberosa* L.). *Electron. J. Biol.* **2008**, *4*, 98–101.

215. Seo, S.G.; Ryu, S.H.; Zhou, Y.; Kim, S.H. Development of an efficient protocol for high-frequency regeneration system in *Hibiscus syriacus* L. *J. Plant Biotechnol.* **2017**, *44*, 164–170.
216. Shabbir, A.; Hameed, N.; Ali, A.; Bajwa, R. Effect of different cultural conditions on micropropagation of rose (*Rosa indica* L.). *Pak. J. Bot.* **2009**, *41*, 2877–2882.
217. Sharma, U.; Kataria, V.; Shekhawat, N.S. In vitro propagation, ex vitro rooting and leaf micromorphology of *Bauhinia racemosa* Lam.: a leguminous tree with medicinal values. *Physiol. Mol. Biol. Plants* **2017**, *23*, 969–977.
218. Sheela, V. L.; Sarada, S.; Anitha, S. Development of protocorm-like bodies and shoots in *Dendrobium* cv. Sonia following gamma irradiation. *J. Trop. Agric.* **2006**, *44*, 86–87.
219. Shen, X.; Kane, M. E.; Chen, J. Effects of genotype, explant source, and plant growth regulators on indirect shoot organogenesis in *Dieffenbachia* cultivars. *In Vitro Cell. Dev. Biol.–Plant* **2008**, *44*, 282–288.
220. Sherif, N.A.; Senthil Kumar, T.; Rao, M.V. DNA barcoding and genetic fidelity assessment of micropropagated *Aenhenrya rotundifolia* (Blatt.) C.S. Kumar and F.N. Rasm.: a critically endangered jewel orchid. *Physiol. Mol. Biol. Plants* **2020**, *26*, 2391–2405.
221. Shiau, Y.J.; Nalawade, S.M.; Hsia, C.N.; Mulabagal V.; Tsay, H.S. In vitro propagation of the Chinese medicinal plant, *Dendrobium candidum* wall. ex lindl., from axenic nodal segments. *In Vitro Cell. Dev. Biol.–Plant* **2005**, *41*, 666–670.
222. Shin, K.S.; Murthy, H.N.; Heo, J.W.; Hahn, E.J.; Paek, K.Y. The effect of light quality on the growth and development of in vitro cultured *Doritaenopsis* plants. *Acta Physiol. Plant.* **2008**, *30*, 339–343.
223. Singh, K.; Madhavan, J.; Sadhukhan, R.; Chandra, S.; Rao, U.; Mandal, P.K. Production of nematode free plantlets in *Polianthes tuberosa* using in vitro culture techniques. *Hortic. Environ. Biotechnol.* **2020**, *61*, 929–937.
224. Singh, N.; Kumaria, S. A combinational phytomolecular-mediated assessment in micropropagated plantlets of *Coelogyne ovalis* Lindl.: A horticultural and medicinal orchid. *Proc. Natl. Acad. Sci., India, Sect. B Biol. Sci.* **2020**, *90*, 455–466.
225. Sinha, P.; Jahan, M.A.A. Clonal propagation of *Phalaenopsis amabilis* (L.) BL. cv. 'Golden Horizon' through In vitro culture of leaf segments. *Bangladesh J. Sci. Ind. Res.* **2011**, *46*, 163–168.
226. Soares, J.D.R.; Pasqual, M.; Rodrigues, F.A.; Villa, F.; Araujo, A.G.D. Silicon sources in the micropropagation of the *Cattleya* group orchid. *Acta Sci. Agron.* **2011**, *33*, 503–507.
227. Song, K.; Kim, D.H.; Sivanesan, I. Effect of plant growth regulators on micropropagation of *Hosta minor* (Baker) Nakai through shoot tip culture. *Propag. Ornament. Plants* **2020**, *20*, 57–62.
228. Sopalun, K.; Thammasiri, K.; Ishikawa, K. Micropropagation of the Thai orchid *Grammatophyllum speciosum* blume. *Plant Cell Tiss. Organ Cult.* **2010**, *101*, 143–150.
229. Souza, E.H.; Soares, T.L.; Souza, F.V.D.; Santos-Serejo, J.A. Micropropagation of *Heliconia rostrata* and *Heliconia bihai* from mature zygotic embryos. *Acta Hort.* **2008**, *865*, 315–320.
230. Sultana, K.S.; Hasan, K.M.; Hasan, K.M.; Sultana, S.; Mehraj, H.; Shimasaki, K.; Habiba, S.U. Effect of hyaluronic acid (ha) on organogenesis in protocorm-like bodies (PLBs) of *Phalaenopsis* 'Fmk02010' cultured in vitro. *Am. Eurasian J. Agric. Environ. Sci.* **2015a**, *15*, 1721–1724.
231. Sultana, K.S.; Hasan, K.M.; Hasan, K.M.; Sultana, S.; Mehraj, H.; Ahasan, M.; Shimasaki, K.; Habiba, S.U. Effect of two elicitors on organogenesis in protocorm-like bodies (PLBs) of *Phalaenopsis* 'Fmk02010' cultured in vitro. *World Appl. Sci. J.* **2015b**, *33*, 1528–1532.
232. Sunitibala Devi, Y.; Neelashree, N. Micropropagation of the monopodial orchid, *Rhynchostylis retusa* (L.). *Int. J. Life Sci.* **2018**, *6*, 181–186.
233. Surendranath, R.; Ganga, M.; Jawaharlal, M. In vitro propagation of tuberose. *Environ. Ecol.* **2015**, *34*, 2556–2560.
234. Tanaka, M.; Takamura, T.; Watanabe, H.; Endo, M.; Yanagi, T.; Okamoto, K. In vitro growth of *Cymbidium* plantlets cultured under superbright red and blue light-emitting diodes (LEDs). *J. Hortic. Sci. Biotech.* **1998**, *73*, 39–44.
235. Tao, J.; Yu, L.; Kong, F.; Zhao, D. Effects of plant growth regulators on in vitro propagation of *Cymbidium faberi* Rolfe. *Afr. J. Biotechnol.* **2011**, *10*, 15639–15646.
236. Tawfik, A.A.; Ibrahim, O.H.M.; Abdul-Hafeez, E.Y.; Ibrahim, S.A. Optimizing micropropagation protocol for *Rosa hybrida* cv. Eiffel Tower with improved in vitro rooting ability. *Egypt. J. Hort.* **2018**, *45*, 323–335.
237. Thokchom, R.; Maitra, S. Micropropagation of *Anthurium andreanum* cv. Jewel from leaf explants. *J. Crop Weed* **2017**, *13*, 23–27.
238. Thokchom, R.; Maitra, S. Micropropagation of *Anthurium andreanum* cv. Jewel from leaf explants. *J. Crop Weed* **2017**, *13*, 23–27.
239. Tibkwang, A.; Junkasiraporn, S.; Chotikadachanarong, K. Effects of cytokinin and sucrose on tissue culture of *Rosa chinensis* Jacq. var. *minima* Voss. *Burapha Sci. J.* **2018**, *23*, 712–721.
240. Tikendra, L.; Kojiam, A.S.; Nongdam, P. Molecular markers based genetic fidelity assessment of micropropagated *Dendrobium chrysotoxum* Lindl. *Meta Gene*, **2019**, *20*, 100562.
241. Tikendra, L.; Potshangbam, A.M.; Dey, A.; Devi, T.R.; Sahoo, M.R.; Nongdam, P. RAPD, ISSR, and SCoT markers based genetic stability assessment of micropropagated *Dendrobium fimbriatum* Lindl. var. *oculatum* Hk. f.- an important endangered orchid. *Physiol. Mol. Biol. Plants* **2021**, *27*, 341–357.

242. Timofeeva, S.N.; Elkonin, L.A.; Tyrtov, V.S. Micropropagation of *Laburnum anagyroides* Medic. through axillary shoot regeneration. *In Vitro Cell. Dev. Biol.–Plant* **2014**, *50*, 561–567.
243. Tirkey, D.S.; Nirala, D.P.; Kumari, D.P.N.P. Micropropagation from nodal explants of rose (*Rosa hybrida* L.) at different concentration of BAP (6-Benzyl Amino Purine). *Int. J. Chem. Stud.* **2019**, *SP6*, 427–430.
244. Torabi-Giglou, M.; Hajieghrari, B. *In vitro* study on regeneration of *Gladiolus grandiflorus* corm calli as affected by plant growth regulators. *Pak. J. Biol. Sci.* **2008**, *1*, 1147–1154.
245. Tour, J.; Ikram, U.; Bilal, M.; Ali, M.; Zaheer, U.; Nawaz, M.A. Efficient *in vitro* propagation of *Amaranthus viridis* L. using node explants. *Acta Sci. Pol. Hortorum Cultus* **2020**, *19*, 41–51.
246. Tripathi, M.K.; Malviya, R.K.; Vidhyashankar, M.; Patel, R.P. Effect of plant growth regulators on *in vitro* morphogenesis in gladiolus (*Gladiolus hybridus* Hort.) from cultured corm slice. *Int. J. Agric. Tech.* **2017**, *13*, 583–599.
247. Ülfer, R.; Türkoğlu, N.; Özdemir, F.A. Micropropagation of *Zinnia elegans* L. *Int. J. Agri. For. Life Sci.* **2020**, *4*, 161–6.
248. Veraplakorn, V. *In vitro* micropropagation and allelopathic effect of lantana (*Lantana camara* L.). *Agric. Nat. Resour.* **2017**, *51*, 478–484.
249. Vila, I.; Sales, E.; Ollero, J.; Munoz-Bertomeu, J.; Segura, J.; Arrillaga, I. Micropropagation of oleander (*Nerium oleander* L.). *HortSci.* **2010**, *45*, 98–102.
250. Wang, G.Y.; Yuan, M.F.; Hong, Y. *In vitro* flower induction in roses. *In Vitro Cell. Dev. Biol.–Plant* **2002**, *38*, 513–518.
251. Wang, H.Y.; He, S.L.; Tanaka, M.; Van, P.T.; da Silva, J.A.T. Effect of IBA concentration, carbon source, substrate, and light source on root induction ability of tree peony (*Paeonia suffruticosa* Andr.) plantlets *in vitro*. *Europ. J. Hort. Sci.* **2012b**, *77*, 122.
252. Wang, H.Y.; He, S.L.; Tanaka, M.; Van, P.T.; da Silva, J.A.T. Effect of IBA concentration, carbon source, substrate, and light source on root induction ability of tree peony (*Paeonia suffruticosa* Andr.) plantlets *in vitro*. *Europ. J. Hort. Sci.* **2012a**, *77*, S122–S128.
253. Waseem, K.; Jilani, M.S.; Jaskani, M.J.; Khan, M.S.; Kiran, M.; Khan, G.U. Significance of different plant growth regulators on the regeneration of chrysanthemum plantlets (*Dendranthema morifolium* L.) through shoot tip culture. *Pak. J. Bot.* **2011**, *43*, 1843–1848.
254. Wei, A.; Xu, Y.; Yang, N.; Jiang, L.; Hu, J.; Yang, H.; Cai, C.; Chen, J.; Chen, G.; Pan, D. *In vitro* propagation of *Codiaeum variegatum* ‘Golden Queen’. *Chinese J. Trop. Crops* **2019**, *40*, 724–730.
255. Wei, X.; Chen, J.; Zhang, C.; Wang, Z. *In vitro* shoot culture of *Rhododendron fortunei*: An important plant for bioactive phytochemicals. *Ind. Crops Prod.* **2018**, *126*, 459–465.
256. Winhelmann, M.C.; Tedesco, M.; Lucchese, J.R.; Fior, C.S.; Schafer, G. (*In vitro* propagation of *Angelonia integerrima*. *Rodriguésia* **2019**, *70*, e02232017.
257. Wojtania, A.; Matysiak, B. *In vitro* propagation of *Rosa* ‘Konstancin’ (*R. rugosa* × *R. beggeriana*), a plant with high nutritional and pro-health value. *Folia Hort.* **2018**, *30*, 259–267.
258. Wongnok, A.; Piluek, C.; Techasilpitak, T.; Tantivivat, S. Effects of light emitting diodes on micropropagation of *Phalaenopsis* orchids. *Acta Hort.* **2008**, *788*, 149–156.
259. Wu, H.C.; Lin, C.C. Red light-emitting diode light irradiation improves root and leaf formation in difficult-to-propagate *Protea cynaroides* L. plantlets *in vitro*. *HortSci.* **2012**, *47*, 1490–1494.
260. Xu, J.; Beleski, D.G.; Vendrame, W.A. Effects of culture methods and plant growth regulators on *in vitro* propagation of
261. *Brassavola nodosa* (L.) Lindl. hybrid. *In Vitro Cell. Dev. Biol.–Plant* **2022**, <https://doi.org/10.1007/s11627-022-10276-7>
262. Yalcin-Mendi, Y.; Unek, C.; Eldogan, S.; Akakacar, Y.; Serce, S.; Curuk, P.; Kocaman, E. The effects of different hormones on regeneration of gazania (*Gazania rigens*). *Rom. Biotechnol. Lett.* **2009**, *14*, 4728–4732.
263. Yamaner, Ö.; Erdag, B. Direct shoot formation and microtuberization from aseptic seedlings of *Cyclamen mirabile* Hildebr. *Biotechnology* **2008**, *7*, 328–332.
264. Youssef, N.M.; Shaaban, S.A.; Ghareeb, Z.F.; Taha, L.S. *In vitro* bulb formation of direct and indirect regeneration of *Lilium orientalis* cv. “Starfighter” plants. *Bull. Natl. Res. Cent.* **2019**, *43*, 211.
265. Zahara, M.; Datta, A.; Boonkorkaew, P.; Mishra, A. The effects of different media, sucrose concentrations and natural additives on plantlet growth of *Phalaenopsis* hybrid ‘Pink’. *Brazilian Archives of Biology and Technology* **2017**, *60*.
266. Zanello, C.A.; Cardoso, J.C. PLBs induction and clonal plantlet regeneration from leaf segment of commercial hybrids of *Phalaenopsis*. *J. Hort. Sci. Biotechnol.* **2019**, *94*, 627–631.
267. Zhao, D.; Hu, G.; Chen, Z.; Shi, Y.; Zheng, L.; Tang, A.; Long, C. Micropropagation and *in vitro* flowering of *Dendrobium wangliangii*: a critically endangered medicinal orchid. *J. Med. Plants Res.* **2013**, *7*, 2098–2110.
268. Zhao, P.; Wu, F.; Feng, F.S.; Wang, W.J. Protocorm-like body (PLB) formation and plant regeneration from the callus culture of *Dendrobium candidum* Wall ex Lindl. *In Vitro Cell. Dev. Biol.–Plant* **2008**, *44*, 178–185.
269. Zielińska, S.; Piątczak, E.; Kozłowska, W.; Bohater, A.; Jezierska-Domaradzka, A.; Kolniak-Ostek, J.; Matkowski, A. LED illumination and plant growth regulators’ effects on growth and phenolic acids accumulation in *Moluccella laevis* L. *in vitro* cultures. *Acta Physiol. Plant.* **2020**, *42*, 72.
